# Supplementary material for: Enantioselective access to spiro[2,3-dihydrofuran-2,2′-inden-1-ones]viazinc catalyzed [3 + 2] annulation of α-hydroxy-1-indanones with yne–enones
Source: Royal Society of Chemistry journal article supplement (doi:10.1039/d3qo00825h), 2023-01-01
Supplement: d3qo00825h1.pdf [file d3qo00825h1.pdf]

## Supporting Information

### **Enantioselective access to spiro[2,3-dihydrofuran-2,2'-inden-1-ones] via zinc catalyzed [3 + 2] annulation of $\alpha$ -hydroxy-1-indanones with yne-enones**

Jiao-Jiao Han, Tao Jiang, Cui Zhang, Dan-Dan Cui, Yuan-Zhao Hua,\* Guang-Jian Mei, Min-Can Wang,\* and Shi-Kun Jia\*

College of Chemistry and Institute of Green Catalysis, Zhengzhou University, Zhengzhou City, Henan 450000, P. R. China

Email: hyzhao@zzu.edu.cn, wangmincan@zzu.edu.cn, jiashikun@zzu.edu.cn

### **Table of Contents**

|                                                                         |             |
|-------------------------------------------------------------------------|-------------|
| <b>1. General Information</b>                                           | <b>S2</b>   |
| <b>2. General Procedure for optimization of the reaction conditions</b> | <b>S2</b>   |
| <b>3. Synthesis of enantioenriched 3</b>                                | <b>S2</b>   |
| <b>4. Scale-up reaction</b>                                             | <b>S16</b>  |
| <b>5. The late-stage functionalization</b>                              | <b>S17</b>  |
| <b>6. Derivatization</b>                                                | <b>S18</b>  |
| <b>7. References</b>                                                    | <b>S21</b>  |
| <b>8. NMR Spectra</b>                                                   | <b>S22</b>  |
| <b>9. HPLC</b>                                                          | <b>S63</b>  |
| <b>10. Single-crystal X-ray diffraction</b>                             | <b>S101</b> |

## General Information

All reactions were carried out under an atmosphere of argon using oven-dried glassware. Super dry solvents, metal catalysts, were purchased from chemical companies and used without further treatment. Flash column chromatography was performed using silica gel (300-400 mesh). <sup>1</sup>H NMR, <sup>13</sup>C NMR, <sup>19</sup>F NMR spectra were recorded in CDCl<sub>3</sub> or DMSO-d<sub>6</sub> on a 400 MHz spectrometer; chemical shifts are reported in ppm with the solvent signals as reference, and coupling constants (*J*) are given in Hertz. The peak information is described as: s = singlet, d = doublet, t = triplet, q = quartet, m = multiplet. High-resolution mass spectra (HRMS) were obtained using an Agilent LC-MSAD-Trap-XCT instrument using electrospray ionization time-of-flight (ESI-TOF). High performance liquid chromatography (HPLC) was performed on instrument consisted of JASCO model PU-1580 intelligent HPLC pump and JASCO model UV-1575 intelligent UV-vis detector (254 nm) using Daicel Chiralpak IC, ID (4.6 mm × 250 mm) columns. Melting points were determined using YRT-3 melting point apparatus. Optical rotations were measured with Perkin Elmer, model 341 Polarimeter. The instrumentation used for the crystal measurement is Oxford Gemini E X-ray single-crystal diffractometer.  $\alpha$ -Hydroxy-1-indanones<sup>1</sup> and yne-enones<sup>2</sup> were synthesized according to the literature.

## General Procedure for optimization of the reaction conditions

Under a nitrogen atmosphere, a solution of diethylzinc (20  $\mu$ L, 1.0 M in hexane, 0.02 mmol, 0.2 eq) was added dropwise to a solution of **L** (0.01 mmol, 0.1 eq) in solvent (2 mL). After the mixture was stirred for 30 min at 40 °C, then,  $\alpha$ -hydroxy-1-indanone **1a** (0.1 mmol, 14.8 mg, 1.0 eq), yne-enone **2a** (0.1 mmol, 24.6 mg, 1.0 eq), and additives were added. The reaction mixture was stirred for 48 h at the same temperature. The reaction was quenched with NH<sub>4</sub>Cl solution (2 mL), and the aqueous layer was extracted with CH<sub>2</sub>Cl<sub>2</sub> (3 × 5 mL). The combined organic layer was washed with brine and dried over Na<sub>2</sub>SO<sub>4</sub>. The solvent was removed under reduced pressure by using a rotary evaporator. The residue was purified by flash chromatography with petroleum ether/ethyl acetate (4/1) to afford the desired product **3a**.

## Synthesis of chiral spiro[2,3-dihydrofuran-2,2'-inden-1-ones]

Under a nitrogen atmosphere, a solution of diethylzinc (40  $\mu$ L, 1.0 M in hexane, 0.04 mmol, 0.2 eq) was added dropwise to a solution of **L1** (0.02 mmol, 14.0 mg, 0.1 eq) in toluene (2 mL). After the mixture was stirred for 30 min at 40 °C. Then,  $\alpha$ -hydroxy-1-indanone **1a** (0.2 mmol, 29.6 mg, 1.0 eq), yne-enone **2a** (0.2 mmol, 49.2 mg, 1.0 eq) and 2-Br-4-ClPhOH (0.04 mmol, 8.28 mg, 0.2 eq) were added. The reaction mixture was stirred for 48 h at 40 °C. The reaction was quenched with NH<sub>4</sub>Cl solution (4 mL), and the aqueous layer was extracted with CH<sub>2</sub>Cl<sub>2</sub> (3 × 5 mL). The combined organic layer was washed with brine and dried over Na<sub>2</sub>SO<sub>4</sub>. The solvent was removed under reduced pressure by using a rotary evaporator. The residue was purified by flash chromatography with petroleum ether/ethyl acetate (4/1) to afford the desired product **3a**.

**(2R,3R)-4-acetyl-5-benzyl-3-phenyl-3H-spiro[furan-2,2'-inden]-1'(3'H)-one (3a):**

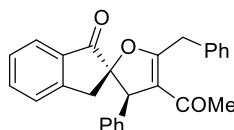

**3a**

Followed the general procedure, using **1a** (0.2 mmol, 29.6 mg), **2a** (0.2 mmol, 49.8 mg) and **L1** (0.02 mmol, 14.1 mg). Purified by flash column chromatography (petroleum ether/ethyl acetate 4:1)

to afforded **3a** as a light yellow oil (54.2 mg, 65% yield, >20:1 dr);  $[\alpha]_D^{20} = -152.8$  ( $c = 2.0$ , DCM, 98% ee);  $^1\text{H NMR}$  (400 MHz,  $\text{CDCl}_3$ )  $\delta$  7.82 – 7.64 (m, 1H), 7.49 – 7.40 (m, 1H), 7.38 – 7.13 (m, 9H), 7.09 – 7.02 (m, 1H), 6.90 (s, 2H), 4.48 (s, 1H), 4.12 (dd,  $J = 92.8, 14.2$  Hz, 2H), 2.72 (dd,  $J = 96.5, 17.6$  Hz, 2H), 1.82 (s, 3H);  $^{13}\text{C NMR}$  (101 MHz,  $\text{CDCl}_3$ )  $\delta$  200.5, 194.6, 169.4, 150.7, 139.4, 136.4, 136.0, 133.3, 129.1, 129.0, 128.5, 128.2, 128.0, 126.7, 126.3, 125.3, 116.0, 93.1, 53.8, 36.2, 34.2, 29.8; **HRMS** (ESI):  $m/z$   $[\text{M} + \text{Na}]^+$  calcd for  $[\text{C}_{27}\text{H}_{22}\text{NaO}_3]^+$ : 417.1461, found: 417.1462; **HPLC**: Daicel Chiralpak IC,  $n$ -hexane/ $i$ -PrOH = 70/30, flow rate = 1 mL/min,  $\lambda = 254$  nm,  $t_{\text{major}} = 21.87$  min and  $t_{\text{minor}} = 10.83$  min.

**(2R,3R)-4-acetyl-5-benzyl-5'-fluoro-3-phenyl-3H-spiro[furan-2,2'-inden]-1'(3'H)-one (3b):**

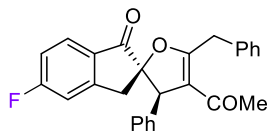

**3b**

Followed the general procedure, using **1b** (0.2 mmol, 33.4 mg), **2a** (0.2 mmol, 49.8 mg) and **L1** (0.02 mmol, 14.2 mg). Purified by flash column chromatography (petroleum ether/ethyl acetate 4:1) to afforded **3b** as a light yellow oil (67.9 mg, 78% yield, >20:1 dr);  $[\alpha]_D^{20} = -133.8$  ( $c = 2.0$ , DCM, 97% ee);  $^1\text{H NMR}$  (400 MHz,  $\text{CDCl}_3$ )  $\delta$  7.88 – 7.78 (m, 1H), 7.43 – 7.37 (m, 2H), 7.35 – 7.27 (m, 5H), 7.26 – 7.21 (m, 1H), 7.12 – 7.06 (m, 1H), 6.99 (s, 2H), 6.86 – 6.79 (m, 1H), 4.57 (s, 1H), 4.20 (dd,  $J = 92.2, 14.4$  Hz, 2H), 2.79 (dd,  $J = 94.1, 17.9$  Hz, 2H), 1.92 (s, 3H);  $^{13}\text{C NMR}$  (101 MHz,  $\text{CDCl}_3$ )  $\delta$  198.7, 194.6, 169.2, 167.8(d,  $J = 258.7$ Hz), 153.7 (d,  $J = 10.5$  Hz), 139.2, 136.3, 129.6 (d,  $J = 1.8$  Hz), 129.2, 129.0, 128.5, 128.1, 127.8 (d,  $J = 10.6$  Hz), 126.8, 116.6 (d,  $J = 23.8$  Hz), 116.0, 113.2 (d,  $J = 22.6$  Hz), 93.1, 53.9, 36.2, 34.2, 29.8;  $^{19}\text{F NMR}$  (376 MHz,  $\text{CDCl}_3$ )  $\delta$  -99.7; **HRMS** (ESI):  $m/z$   $[\text{M} + \text{Na}]^+$  calcd for  $[\text{C}_{27}\text{H}_{21}\text{FNaO}_3]^+$ : 435.1367, found: 435.1375; **HPLC**: Daicel Chiralpak IC,  $n$ -hexane/ $i$ -PrOH = 70/30, flow rate = 1 mL/min,  $\lambda = 254$  nm,  $t_{\text{major}} = 21.35$  min and  $t_{\text{minor}} = 11.26$  min.

**(2R,3R)-4-acetyl-5-benzyl-5'-chloro-3-phenyl-3H-spiro[furan-2,2'-inden]-1'(3'H)-one (3c):**

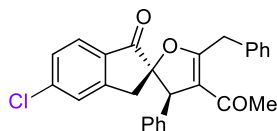

**3c**

Followed the general procedure, using **1c** (0.2 mmol, 36.4 mg), **2a** (0.2 mmol, 49.8 mg) and **L1** (0.02 mmol, 14.0 mg). Purified by flash column chromatography (petroleum ether/ethyl acetate 4:1) to afforded **3c** as a light yellow oil (57.7 mg, 64% yield, >20:1 dr);  $[\alpha]_D^{20} = -164.6$  ( $c = 1.0$ , DCM, 98% ee);  $^1\text{H NMR}$  (400 MHz,  $\text{CDCl}_3$ )  $\delta$  7.74 (d,  $J = 8.2$  Hz, 1H), 7.44 – 7.35 (m, 3H), 7.35 – 7.29 (m, 4H), 7.29 – 7.21 (m, 2H), 7.16 (s, 1H), 6.99 (s, 2H), 4.56 (s, 1H), 4.20 (dd,  $J = 90.6, 14.3$  Hz, 2H), 2.78 (dd,  $J = 95.0, 17.9$  Hz, 2H), 1.91 (s, 3H);  $^{13}\text{C NMR}$  (101 MHz,  $\text{CDCl}_3$ )  $\delta$  199.1, 194.6, 169.3, 152.3, 142.6, 139.1, 136.3, 131.7, 129.2, 129.1, 129.0, 128.5, 128.1, 126.8, 126.5, 126.4, 116.0, 93.0, 53.8, 36.0, 34.1, 29.8; **HRMS** (ESI):  $m/z$   $[\text{M} + \text{Na}]^+$  calcd for  $[\text{C}_{27}\text{H}_{21}\text{ClNaO}_3]^+$ : 451.1071, found: 451.1078; **HPLC**: Daicel Chiralpak IC,  $n$ -hexane/ $i$ -PrOH = 70/30, flow rate = 1 mL/min,  $\lambda = 254$  nm,  $t_{\text{major}} = 22.86$  min and  $t_{\text{minor}} = 11.50$  min.

**(2R,3R)-4-acetyl-5-benzyl-5'-bromo-3-phenyl-3H-spiro[furan-2,2'-inden]-1'(3'H)-one (3d):**

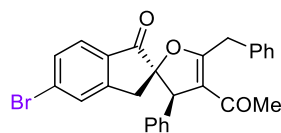

**3d**

Followed the general procedure, using **1d** (0.2 mmol, 45.4 mg), **2a** (0.2 mmol, 49.8 mg) and **L1** (0.02 mmol, 14.0 mg). Purified by flash column chromatography (petroleum ether/ethyl acetate 4:1) to afforded **3d** as a light yellow oil (64.4 mg, 65% yield, >20:1 dr);  $[\alpha]_D^{20} = -123.4$  (c = 2.0, DCM, 98% ee); **<sup>1</sup>H NMR** (400 MHz, CDCl<sub>3</sub>) δ 7.66 (d, *J* = 8.2 Hz, 1H), 7.55 – 7.50 (m, 1H), 7.40 (d, *J* = 7.2 Hz, 2H), 7.36 – 7.27 (m, 6H), 7.26 – 7.22 (m, 1H), 7.05 – 6.92 (m, 2H), 4.55 (s, 1H), 4.19 (dd, *J* = 90.0, 14.3 Hz, 2H), 2.78 (dd, *J* = 94.4, 17.9 Hz, 2H), 1.91 (s, 3H); **<sup>13</sup>C NMR** (101 MHz, CDCl<sub>3</sub>) δ 199.3, 194.6, 169.2, 152.2, 139.1, 136.3, 132.1, 132.0, 131.6, 129.6, 129.2, 129.0, 128.6, 128.1, 126.8, 126.5, 116.0, 92.9, 53.8, 35.9, 34.2, 29.8; **HRMS** (ESI): *m/z* [M + Na]<sup>+</sup> calcd for [C<sub>27</sub>H<sub>21</sub>BrNaO<sub>3</sub>]<sup>+</sup>: 495.0566, found: 495.0569; **HPLC**: Daicel Chiralpak IC, *n*-hexane/*i*-PrOH = 70/30, flow rate = 1 mL/min, λ = 254 nm, *t*<sub>major</sub> = 29.59 min and *t*<sub>minor</sub> = 14.15 min.

**(2R,3R)-4-acetyl-5-benzyl-5'-methoxy-3-phenyl-3H-spiro[furan-2,2'-inden]-1'(3'H)-one (3e):**

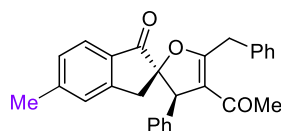

**3e**

Followed the general procedure, using **1e** (0.2 mmol, 32.2 mg), **2a** (0.2 mmol, 49.8 mg) and **L1** (0.02 mmol, 14.0 mg). Purified by flash column chromatography (petroleum ether/ethyl acetate 4:1) to afforded **3e** as a light yellow oil (63.0 mg, 73% yield, >20:1 dr);  $[\alpha]_D^{20} = -191.3$  (c = 2.0, DCM, 94% ee); **<sup>1</sup>H NMR** (400 MHz, CDCl<sub>3</sub>) δ 7.70 (d, *J* = 7.9 Hz, 1H), 7.45 – 7.39 (m, 2H), 7.36 – 7.23 (m, 6H), 7.19 (d, *J* = 7.9 Hz, 1H), 7.09 – 6.88 (m, 3H), 4.56 (s, 1H), 4.20 (dd, *J* = 101.6, 14.3 Hz, 2H), 2.75 (dd, *J* = 95.1, 17.7 Hz, 2H), 2.37 (s, 3H), 1.90 (s, 3H); **<sup>13</sup>C NMR** (101 MHz, CDCl<sub>3</sub>) δ 200.0, 194.7, 169.4, 151.2, 147.6, 139.5, 136.4, 130.9, 129.5, 129.1, 129.0, 128.5, 127.9, 126.7, 126.6, 125.2, 116.0, 93.3, 53.9, 36.1, 34.2, 29.8, 22.2; **HRMS** (ESI): *m/z* [M + Na]<sup>+</sup> calcd for [C<sub>28</sub>H<sub>24</sub>NaO<sub>3</sub>]<sup>+</sup>: 431.1618, found: 431.1623; **HPLC**: Daicel Chiralpak IC, *n*-hexane/*i*-PrOH = 70/30, flow rate = 1 mL/min, λ = 254 nm, *t*<sub>major</sub> = 32.91 min and *t*<sub>minor</sub> = 12.82 min.

**(2R,3R)-4-acetyl-5-benzyl-5'-methoxy-3-phenyl-3H-spiro[furan-2,2'-inden]-1'(3'H)-one (3f):**

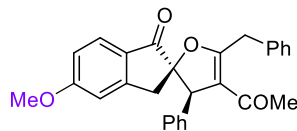

**3f**

Followed the general procedure, using **1f** (0.2 mmol, 35.4 mg), **2a** (0.2 mmol, 49.8 mg) and **L1** (0.02 mmol, 14.0 mg). Purified by flash column chromatography (petroleum ether/ethyl acetate 4:1) to afforded **3f** as a light yellow oil (57.2 mg, 64% yield, >20:1 dr);  $[\alpha]_D^{20} = -182.1$  (c = 2.0, DCM, 98% ee); **<sup>1</sup>H NMR** (400 MHz, CDCl<sub>3</sub>) δ 7.66 (d, *J* = 8.6 Hz, 1H), 7.34 (d, *J* = 7.4 Hz, 2H), 7.26 – 7.22 (m, 2H), 7.21 – 7.12 (m, 4H), 7.01 – 6.86 (m, 2H), 6.85 – 6.80 (m, 1H), 6.55 – 6.45 (m, 1H), 4.51 (s, 1H), 4.12 (dd, *J* = 107.5, 14.3 Hz, 2H), 3.72 (s, 3H), 2.67 (dd, *J* = 89.9, 17.8 Hz, 2H), 1.82 (s, 3H); **<sup>13</sup>C NMR** (101 MHz, CDCl<sub>3</sub>) δ 198.6, 194.7, 169.4, 166.3, 153.9, 139.6, 136.5, 129.1, 129.0,

128.5, 127.8, 127.1, 126.7, 126.2, 116.2, 116.0, 109.5, 93.4, 55.7, 53.9, 36.4, 34.2, 29.8; **HRMS** (ESI):  $m/z$   $[M + Na]^+$  calcd for  $[C_{28}H_{24}NaO_4]^+$ : 447.1567, found: 447.1568; **HPLC**: Daicel Chiralpak IC, *n*-hexane/*i*-PrOH = 70/30, flow rate = 1 mL/min,  $\lambda$  = 254 nm,  $t_{major}$  = 61.12 min and  $t_{minor}$  = 22.59 min.

**(2R,3R)-4-acetyl-5-benzyl-6'-fluoro-3-phenyl-3H-spiro[furan-2,2'-inden]-1'(3'H)-one (3g):**

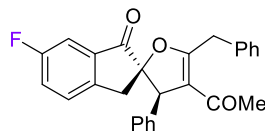

**3g**

Followed the general procedure, using **1g** (0.2 mmol, 33.0 mg), **2a** (0.2 mmol, 49.8 mg) and **L1** (0.02 mmol, 14.0 mg). Purified by flash column chromatography (petroleum ether/ethyl acetate 4:1) to afforded **3g** as a light yellow oil (60.9 mg, 70% yield, >20:1 dr);  $[\alpha]_D^{20}$  = -102.4 ( $c$  = 2.0, DCM, 98% ee); **<sup>1</sup>H NMR** (400 MHz,  $CDCl_3$ )  $\delta$  7.47 – 7.43 (m, 1H), 7.41 (d,  $J$  = 7.3 Hz, 2H), 7.36 – 7.26 (m, 6H), 7.26 – 7.22 (m, 1H), 7.16 – 7.11 (m, 1H), 7.07 – 6.90 (m, 2H), 4.55 (s, 1H), 4.20 (dd,  $J$  = 82.3, 14.4 Hz, 2H), 2.77 (dd,  $J$  = 96.3, 17.4 Hz, 2H), 1.92 (s, 3H); **<sup>13</sup>C NMR** (101 MHz,  $CDCl_3$ )  $\delta$  199.7 (d,  $J$  = 2.7 Hz), 194.6, 169.3, 162.6 (d,  $J$  = 249.5 Hz), 146.2, 139.1, 136.3, 135.0 (d,  $J$  = 7.4 Hz), 129.2, 129.0, 128.6, 128.1, 127.8 (d,  $J$  = 7.8 Hz), 126.8, 123.7 (d,  $J$  = 23.6 Hz), 116.0, 111.1 (d,  $J$  = 22.1 Hz), 93.6, 53.8, 35.7, 34.2, 29.8; **<sup>19</sup>F NMR** (376 MHz,  $CDCl_3$ )  $\delta$  -112.6; **HRMS** (ESI):  $m/z$   $[M + Na]^+$  calcd for  $[C_{27}H_{21}FNaO_3]^+$ : 435.1367, found: 435.1370; **HPLC**: Daicel Chiralpak IC, *n*-hexane/*i*-PrOH = 70/30, flow rate = 1 mL/min,  $\lambda$  = 254 nm,  $t_{major}$  = 19.81 min and  $t_{minor}$  = 13.21 min.

**(2R,3R)-4-acetyl-5-benzyl-6'-chloro-3-phenyl-3H-spiro[furan-2,2'-inden]-1'(3'H)-one (3h):**

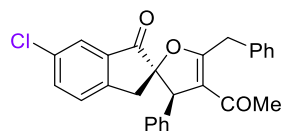

**3h**

Followed the general procedure, using **1h** (0.2 mmol, 36.5 mg), **2a** (0.2 mmol, 49.8 mg) and **L1** (0.02 mmol, 14.0 mg). Purified by flash column chromatography (petroleum ether/ethyl acetate 4:1) to afforded **3h** as a light yellow oil (67.7 mg, 75% yield, >20:1 dr);  $[\alpha]_D^{20}$  = -132.2 ( $c$  = 3.0, DCM, 98% ee); **<sup>1</sup>H NMR** (400 MHz,  $CDCl_3$ )  $\delta$  7.81 – 7.71 (m, 1H), 7.53 – 7.48 (m, 1H), 7.40 (d,  $J$  = 7.4 Hz, 2H), 7.36 – 7.29 (m, 4H), 7.28 – 7.21 (m, 2H), 7.10 (d,  $J$  = 8.2 Hz, 1H), 7.06 – 6.87 (m, 2H), 4.54 (s, 1H), 4.20 (dd,  $J$  = 84.0, 14.4 Hz, 2H), 2.77 (dd,  $J$  = 96.7, 17.7 Hz, 2H), 1.92 (s, 3H); **<sup>13</sup>C NMR** (101 MHz,  $CDCl_3$ )  $\delta$  199.3, 194.6, 169.2, 148.8, 139.1, 136.2, 136.0, 134.8, 134.6, 129.2, 129.0, 128.6, 128.1, 127.6, 126.8, 125.0, 116.0, 93.3, 53.8, 35.8, 34.1, 29.8; **HRMS** (ESI):  $m/z$   $[M + Na]^+$  calcd for  $[C_{27}H_{21}ClNaO_3]^+$ : 451.1071, found: 451.1078; **HPLC**: Daicel Chiralpak IC, *n*-hexane/*i*-PrOH = 70/30, flow rate = 1 mL/min,  $\lambda$  = 254 nm,  $t_{major}$  = 21.44 min and  $t_{minor}$  = 12.64 min.

**(2R,3R)-4-acetyl-5-benzyl-6'-bromo-3-phenyl-3H-spiro[furan-2,2'-inden]-1'(3'H)-one (3i):**

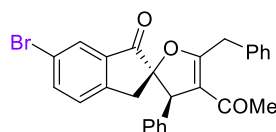

**3i**

Followed the general procedure, using **1i** (0.2 mmol, 45.2 mg), **2a** (0.2 mmol, 49.8 mg) and **L1** (0.02 mmol, 14.0 mg). Purified by flash column chromatography (petroleum ether/ethyl acetate 4:1) to afforded **3i** as a light yellow oil (59.4 mg, 60% yield, >20:1 dr);  $[\alpha]_D^{20} = -115.7$  (c = 2.0, DCM, 98% ee); **<sup>1</sup>H NMR** (400 MHz, CDCl<sub>3</sub>)  $\delta$  7.97 – 7.86 (m, 1H), 7.68 – 7.61 (m, 1H), 7.40 (d,  $J = 7.3$  Hz, 2H), 7.35 – 7.27 (m, 5H), 7.26 – 7.22 (m, 1H), 7.05 (d,  $J = 8.1$  Hz, 1H), 7.03 – 6.84 (m, 2H), 4.54 (s, 1H), 4.20 (dd,  $J = 84.9, 14.4$  Hz, 2H), 2.74 (dd,  $J = 96.3, 17.8$  Hz, 2H), 1.91 (s, 3H); **<sup>13</sup>C NMR** (101 MHz, CDCl<sub>3</sub>)  $\delta$  199.1, 194.6, 169.2, 149.2, 139.0, 138.8, 136.2, 135.1, 129.2, 129.0, 128.6, 128.1, 128.1, 127.9, 126.8, 122.3, 116.0, 93.2, 53.8, 35.9, 34.1, 29.8; **HRMS** (ESI):  $m/z$  [M + Na]<sup>+</sup> calcd for [C<sub>27</sub>H<sub>21</sub>BrNaO<sub>3</sub>]<sup>+</sup>: 495.0566, found: 495.0573; **HPLC**: Daicel Chiralpak IC, *n*-hexane/*i*-PrOH = 70/30, flow rate = 1 mL/min,  $\lambda = 254$  nm,  $t_{\text{major}} = 25.41$  min and  $t_{\text{minor}} = 13.54$  min.

**(2R,3R)-4-acetyl-5-benzyl-6'-methyl-3-phenyl-3H-spiro[furan-2,2'-inden]-1'(3'H)-one (3j):**

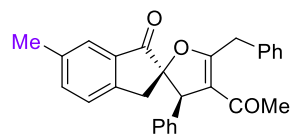

**3j**

Followed the general procedure, using **1j** (0.2 mmol, 32.2 mg), **2a** (0.2 mmol, 49.8 mg) and **L1** (0.02 mmol, 14.0 mg). Purified by flash column chromatography (petroleum ether/ethyl acetate 4:1) to afforded **3j** as a light yellow oil (68.1 mg, 79% yield, >20:1 dr);  $[\alpha]_D^{20} = -155.3$  (c = 1.7, DCM, 99% ee); **<sup>1</sup>H NMR** (400 MHz, CDCl<sub>3</sub>)  $\delta$  7.59 (s, 1H), 7.44 – 7.39 (m, 2H), 7.39 – 7.26 (m, 6H), 7.26 – 7.21 (m, 1H), 7.05 (d,  $J = 7.8$  Hz, 1H), 7.03 – 6.85 (m, 2H), 4.55 (s, 1H), 4.21 (dd,  $J = 95.8, 14.3$  Hz, 2H), 2.75 (dd,  $J = 99.5, 17.5$  Hz, 2H), 2.39 (s, 3H), 1.91 (s, 3H); **<sup>13</sup>C NMR** (101 MHz, CDCl<sub>3</sub>)  $\delta$  200.6, 194.7, 169.5, 148.1, 139.4, 138.3, 137.3, 136.4, 133.4, 129.1, 129.0, 128.5, 127.9, 126.7, 126.0, 125.2, 115.9, 93.5, 53.8, 35.9, 34.2, 29.8, 21.2; **HRMS** (ESI):  $m/z$  [M + Na]<sup>+</sup> calcd for [C<sub>28</sub>H<sub>24</sub>NaO<sub>3</sub>]<sup>+</sup>: 431.1618, found: 431.1628; **HPLC**: Daicel Chiralpak IC, *n*-hexane/*i*-PrOH = 70/30, flow rate = 1 mL/min,  $\lambda = 254$  nm,  $t_{\text{major}} = 33.75$  min and  $t_{\text{minor}} = 12.19$  min.

**(2R,3R)-4-acetyl-5-benzyl-6'-methoxy-3-phenyl-3H-spiro[furan-2,2'-inden]-1'(3'H)-one (3k):**

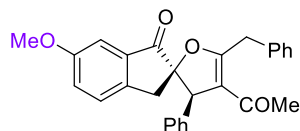

**3k**

Followed the general procedure, using **1k** (0.2 mmol, 35.4 mg), **2a** (0.2 mmol, 49.8 mg) and **L1** (0.02 mmol, 14.0 mg). Purified by flash column chromatography (petroleum ether/ethyl acetate 4:1) to afforded **3k** as a light yellow oil (58.1 mg, 65% yield, >20:1 dr);  $[\alpha]_D^{20} = -227.2$  (c = 1.0, DCM, 98% ee); **<sup>1</sup>H NMR** (400 MHz, CDCl<sub>3</sub>)  $\delta$  7.42 (d,  $J = 7.4$  Hz, 2H), 7.35 – 7.26 (m, 5H), 7.25 – 7.18 (m, 2H), 7.16 – 7.12 (m, 1H), 7.04 (d,  $J = 8.4$  Hz, 1H), 7.03 – 6.84 (m, 2H), 4.55 (s, 1H), 4.21 (dd,  $J = 86.3, 14.3$  Hz, 2H), 3.83 (s, 3H), 2.73 (dd,  $J = 97.8, 17.3$  Hz, 2H), 1.91 (s, 3H); **<sup>13</sup>C NMR** (101 MHz, CDCl<sub>3</sub>)  $\delta$  200.5, 194.6, 169.5, 159.9, 143.6, 139.4, 136.4, 134.4, 129.1, 129.0, 128.5, 127.9, 127.1, 126.7, 125.4, 115.9, 106.4, 93.8, 55.7, 53.9, 35.6, 34.2, 29.8; **HRMS** (ESI):  $m/z$  [M + Na]<sup>+</sup> calcd for [C<sub>28</sub>H<sub>24</sub>NaO<sub>4</sub>]<sup>+</sup>: 447.1567, found: 447.1575; **HPLC**: Daicel Chiralpak IC, *n*-hexane/*i*-PrOH = 70/30, flow rate = 1 mL/min,  $\lambda = 254$  nm,  $t_{\text{major}} = 45.15$  min and  $t_{\text{minor}} = 14.44$  min.

**(2*R*,3*R*)-4-acetyl-5-benzyl-4'-chloro-3-phenyl-3*H*-spiro[furan-2,2'-inden]-1'(3'*H*)-one (3*l*):**

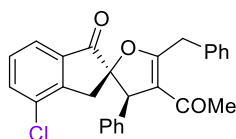

**3*l***

Followed the general procedure, using **1*l*** (0.2 mmol, 36.5 mg), **2*a*** (0.2 mmol, 49.8 mg) and **L1** (0.02 mmol, 14.0 mg). Purified by flash column chromatography (petroleum ether/ethyl acetate 4:1) to afforded **3*l*** as a light yellow oil (58.6 mg, 65% yield, >20:1 dr);  $[\alpha]_D^{20} = -104.0$  (c = 2.0, DCM, 99% ee);  $^1\text{H NMR}$  (400 MHz,  $\text{CDCl}_3$ )  $\delta$  7.72 (d,  $J = 7.5$  Hz, 1H), 7.55 (d,  $J = 7.7$  Hz, 1H), 7.45 – 7.38 (m, 2H), 7.38 – 7.28 (m, 6H), 7.27 – 7.22 (m, 1H), 7.08 – 6.87 (m, 2H), 4.57 (s, 1H), 4.20 (dd,  $J = 85.1, 14.4$  Hz, 2H), 2.79 (dd,  $J = 91.4, 18.2$  Hz, 2H), 1.93 (s, 3H);  $^{13}\text{C NMR}$  (101 MHz,  $\text{CDCl}_3$ )  $\delta$  199.7, 194.6, 169.1, 148.4, 138.9, 136.2, 135.6, 135.2, 132.6, 129.7, 129.3, 129.0, 128.6, 128.2, 126.8, 123.5, 116.0, 92.8, 53.8, 35.2, 34.1, 29.8, 29.7; **HRMS** (ESI):  $m/z$   $[\text{M} + \text{Na}]^+$  calcd for  $[\text{C}_{27}\text{H}_{21}\text{ClNaO}_3]^+$ : 451.1071, found: 451.1073; **HPLC**: Daicel Chiralpak IC, *n*-hexane/*i*-PrOH = 70/30, flow rate = 1 mL/min,  $\lambda = 254$  nm,  $t_{\text{major}} = 21.23$  min and  $t_{\text{minor}} = 11.20$  min.

**(2*R*,3*R*)-4-acetyl-5-benzyl-4'-bromo-3-phenyl-3*H*-spiro[furan-2,2'-inden]-1'(3'*H*)-one (3*m*):**

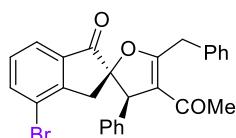

**3*m***

Followed the general procedure, using **1*m*** (0.2 mmol, 45.2 mg), **2*a*** (0.2 mmol, 49.8 mg) and **L1** (0.02 mmol, 14.0 mg). Purified by flash column chromatography (petroleum ether/ethyl acetate 4:1) to afforded **3*m*** as a light yellow oil (62.4 mg, 63% yield, >20:1 dr);  $[\alpha]_D^{20} = -172.2$  (c = 2.0, DCM, 99% ee);  $^1\text{H NMR}$  (400 MHz,  $\text{CDCl}_3$ )  $\delta$  7.79 – 7.68 (m, 2H), 7.40 (d,  $J = 7.4$  Hz, 2H), 7.37 – 7.27 (m, 6H), 7.26 – 7.22 (m, 1H), 7.09 – 6.85 (m, 2H), 4.56 (s, 1H), 4.21 (dd,  $J = 83.0, 14.4$  Hz, 2H), 2.74 (dd,  $J = 94.7, 18.1$  Hz, 2H), 1.92 (s, 3H);  $^{13}\text{C NMR}$  (101 MHz,  $\text{CDCl}_3$ )  $\delta$  199.9, 194.6, 169.2, 150.4, 138.8, 138.7, 136.2, 135.3, 129.9, 129.3, 129.0, 128.6, 128.2, 126.8, 124.1, 121.8, 116.0, 92.8, 53.8, 37.2, 34.2, 29.8; **HRMS** (ESI):  $m/z$   $[\text{M} + \text{Na}]^+$  calcd for  $[\text{C}_{27}\text{H}_{21}\text{BrNaO}_3]^+$ : 495.0566, found: 495.0573; **HPLC**: Daicel Chiralpak IC, *n*-hexane/*i*-PrOH = 70/30, flow rate = 1 mL/min,  $\lambda = 254$  nm,  $t_{\text{major}} = 22.90$  min and  $t_{\text{minor}} = 11.81$  min.

**(2*R*,3*R*)-4-acetyl-5-benzyl-4'-methyl-3-phenyl-3*H*-spiro[furan-2,2'-inden]-1'(3'*H*)-one (3*n*):**

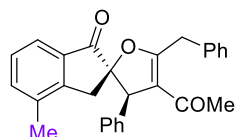

**3*n***

Followed the general procedure, using **1*n*** (0.2 mmol, 32.2 mg), **2*a*** (0.2 mmol, 49.8 mg) and **L1** (0.02 mmol, 14.0 mg). Purified by flash column chromatography (petroleum ether/ethyl acetate 4:1) to afforded **3*n*** as a light yellow oil (58.6 mg, 68% yield, >20:1 dr);  $[\alpha]_D^{20} = -145.0$  (c = 2.0, DCM, 96% ee);  $^1\text{H NMR}$  (400 MHz,  $\text{CDCl}_3$ )  $\delta$  7.66 (d,  $J = 7.4$  Hz, 1H), 7.43 (d,  $J = 7.4$  Hz, 2H), 7.38 – 7.26 (m, 7H), 7.25 – 7.21 (m, 1H), 7.09 – 6.81 (m, 2H), 4.55 (s, 1H), 4.22 (dd,  $J = 102.9, 14.3$  Hz, 2H), 2.67 (dd,  $J = 97.0, 17.5$  Hz, 2H), 2.00 (s, 3H), 1.91 (s, 3H);  $^{13}\text{C NMR}$  (101 MHz,  $\text{CDCl}_3$ )  $\delta$

200.9, 194.7, 169.6, 149.6, 139.3, 136.5, 136.4, 135.6, 133.1, 129.1, 129.0, 128.5, 128.3, 128.0, 126.7, 122.7, 115.7, 93.3, 54.0, 34.8, 34.2, 29.8, 17.6; **HRMS** (ESI):  $m/z$   $[M + Na]^+$  calcd for  $[C_{28}H_{24}NaO_3]^+$ : 431.1618, found: 431.1626; **HPLC**: Daicel Chiralpak IC, *n*-hexane/*i*-PrOH = 70/30, flow rate = 1 mL/min,  $\lambda$  = 254 nm,  $t_{major}$  = 33.90 min and  $t_{minor}$  = 14.63 min.

**(2R,3R)-4-acetyl-5-benzyl-4'-methoxy-3-phenyl-3H-spiro[furan-2,2'-inden]-1'(3'H)-one (3o):**

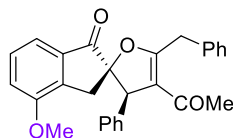

**3o**

Followed the general procedure, using **1o** (0.2 mmol, 35.4 mg), **2a** (0.2 mmol, 49.8 mg) and **L1** (0.02 mmol, 14.0 mg). Purified by flash column chromatography (petroleum ether/ethyl acetate 4:1) to afforded **3o** as a light yellow oil (66.2 mg, 74% yield, >20:1 dr);  $[\alpha]_D^{20} = -283.3$  ( $c = 2.0$ , DCM, 97% ee); **<sup>1</sup>H NMR** (400 MHz,  $CDCl_3$ )  $\delta$  7.40 (d,  $J = 7.8$  Hz, 3H), 7.37 – 7.26 (m, 6H), 7.25 – 7.20 (m, 1H), 7.08 – 6.95 (m, 3H), 4.59 (s, 1H), 4.18 (dd,  $J = 107.2, 14.3$  Hz, 2H), 3.72 (s, 3H), 2.73 (dd,  $J = 80.7, 18.2$  Hz, 2H), 1.91 (s, 3H); **<sup>13</sup>C NMR** (101 MHz,  $CDCl_3$ )  $\delta$  200.7, 194.7, 169.1, 156.5, 139.8, 139.4, 136.4, 134.6, 129.7, 129.1, 129.0, 128.5, 127.9, 126.7, 116.7, 116.3, 116.3, 92.9, 55.4, 53.6, 34.2, 33.1, 29.8; **HRMS** (ESI):  $m/z$   $[M + Na]^+$  calcd for  $[C_{28}H_{24}NaO_4]^+$ : 447.1567, found: 447.1567; **HPLC**: Daicel Chiralpak IC, *n*-hexane/*i*-PrOH = 70/30, flow rate = 1 mL/min,  $\lambda$  = 254 nm,  $t_{major}$  = 31.25 min and  $t_{minor}$  = 14.12 min.

**(2R,3R)-4-acetyl-5-benzyl-3-(4-chlorophenyl)-3H-spiro[furan-2,2'-inden]-1'(3'H)-one (3p):**

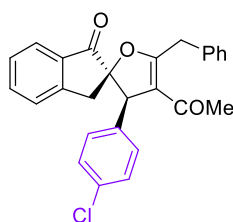

**3p**

Followed the general procedure, using **1a** (0.2 mmol, 29.4 mg), **2b** (0.2 mmol, 56.3 mg) and **L1** (0.02 mmol, 14.0 mg). Purified by flash column chromatography (petroleum ether/ethyl acetate 4:1) to afforded **3p** as a light yellow oil (67.7 mg, 75% yield, >20:1 dr);  $[\alpha]_D^{20} = -230.0$  ( $c = 2.3$ , DCM, 98% ee); **<sup>1</sup>H NMR** (400 MHz,  $CDCl_3$ )  $\delta$  7.81 (d,  $J = 7.6$  Hz, 1H), 7.61 – 7.53 (m, 1H), 7.46 – 7.37 (m, 3H), 7.37 – 7.30 (m, 2H), 7.29 – 7.22 (m, 3H), 7.19 (d,  $J = 7.6$  Hz, 1H), 7.01 – 6.82 (m, 2H), 4.54 (s, 1H), 4.19 (dd,  $J = 88.6, 14.4$  Hz, 2H), 2.82 (dd,  $J = 110.0, 17.6$  Hz, 2H), 1.95 (s, 3H); **<sup>13</sup>C NMR** (101 MHz,  $CDCl_3$ )  $\delta$  200.1, 194.1, 169.6, 150.4, 138.0, 136.2, 133.8, 133.2, 129.6, 129.3, 129.0, 128.6, 128.4, 126.8, 126.3, 125.4, 116.1, 92.9, 53.1, 36.1, 34.2, 29.7; **HRMS** (ESI):  $m/z$   $[M + Na]^+$  calcd for  $[C_{27}H_{21}ClNaO_3]^+$ : 451.1071, found: 451.1075; **HPLC**: Daicel Chiralpak IC, *n*-hexane/*i*-PrOH = 70/30, flow rate = 1 mL/min,  $\lambda$  = 254 nm,  $t_{major}$  = 22.83 min and  $t_{minor}$  = 11.71 min.

**(2R,3R)-4-acetyl-5-benzyl-3-(*p*-tolyl)-3H-spiro[furan-2,2'-inden]-1'(3'H)-one (3q):**



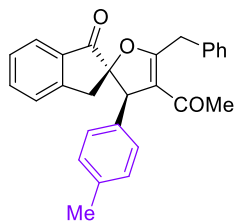

**3q**

Followed the general procedure, using **1a** (0.2 mmol, 29.4 mg), **2c** (0.2 mmol, 52.0 mg) and **L1** (0.02 mmol, 14.0 mg). Purified by flash column chromatography (petroleum ether/ethyl acetate 4:1) to afforded **3q** as a light yellow oil (70.7 mg, 82% yield, >20:1 dr);  $[\alpha]_D^{20} = -254.2$  (c = 2.8, DCM, 96% ee); **<sup>1</sup>H NMR** (400 MHz, CDCl<sub>3</sub>)  $\delta$  7.80 (d,  $J = 7.6$  Hz, 1H), 7.57 – 7.50 (m, 1H), 7.44 – 7.35 (m, 3H), 7.34 – 7.28 (m, 2H), 7.24 (d,  $J = 6.3$  Hz, 1H), 7.16 (d,  $J = 7.7$  Hz, 1H), 7.13 – 7.03 (m, 2H), 6.96 – 6.77 (m, 2H), 4.52 (s, 1H), 4.20 (dd,  $J = 91.9, 14.3$  Hz, 2H), 2.82 (dd,  $J = 82.4, 17.6$  Hz, 2H), 2.32 (s, 3H), 1.91 (s, 3H); **<sup>13</sup>C NMR** (101 MHz, CDCl<sub>3</sub>)  $\delta$  200.6, 194.8, 169.3, 150.8, 137.7, 136.5, 136.3, 136.0, 133.3, 129.8, 129.0, 128.5, 128.2, 126.7, 126.3, 125.3, 116.0, 93.2, 53.5, 36.2, 34.2, 29.8, 21.2; **HRMS** (ESI):  $m/z$   $[M + Na]^+$  calcd for  $[C_{28}H_{24}NaO_3]^+$ : 431.1618, found: 431.1626; **HPLC**: Daicel Chiralpak IC, *n*-hexane/*i*-PrOH = 70/30, flow rate = 1 mL/min,  $\lambda = 254$  nm,  $t_{major} = 25.04$  min and  $t_{minor} = 12.90$  min.

**(2R,3R)-4-acetyl-5-benzyl-3-(3-chlorophenyl)-3H-spiro[furan-2,2'-inden]-1'(3'H)-one (3r):**

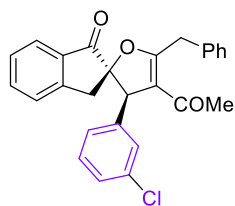

**3r**

Followed the general procedure, using **1a** (0.2 mmol, 29.4 mg), **2d** (0.2 mmol, 56.3 mg) and **L1** (0.02 mmol, 14.0 mg). Purified by flash column chromatography (petroleum ether/ethyl acetate 4:1) to afforded **3r** as a light yellow oil (72.2 mg, 80% yield, >20:1 dr);  $[\alpha]_D^{20} = -216.6$  (c = 4.0, DCM, 96% ee); **<sup>1</sup>H NMR** (400 MHz, CDCl<sub>3</sub>)  $\delta$  7.81 (d,  $J = 7.7$  Hz, 1H), 7.60 – 7.54 (m, 1H), 7.46 – 7.37 (m, 3H), 7.37 – 7.30 (m, 2H), 7.28 – 7.18 (m, 4H), 7.06 – 6.78 (m, 2H), 4.53 (s, 1H), 4.20 (dd,  $J = 91.1, 14.4$  Hz, 2H), 2.82 (dd,  $J = 115.3, 17.7$  Hz, 2H), 1.97 (s, 3H); **<sup>13</sup>C NMR** (101 MHz, CDCl<sub>3</sub>)  $\delta$  200.0, 194.0, 169.7, 150.5, 141.7, 136.2, 136.1, 133.1, 130.4, 128.9, 128.6, 128.4, 128.2, 126.9, 126.3, 125.4, 116.0, 92.9, 53.3, 36.2, 34.2, 29.8; **HRMS** (ESI):  $m/z$   $[M + Na]^+$  calcd for  $[C_{27}H_{21}ClNaO_3]^+$ : 451.1071, found: 451.1072; **HPLC**: Daicel Chiralpak IC, *n*-hexane/*i*-PrOH = 70/30, flow rate = 1 mL/min,  $\lambda = 254$  nm,  $t_{major} = 21.49$  min and  $t_{minor} = 10.85$  min.

**(2R,3R)-4-acetyl-5-benzyl-3-(3-methoxyphenyl)-3H-spiro[furan-2,2'-inden]-1'(3'H)-one (3s):**

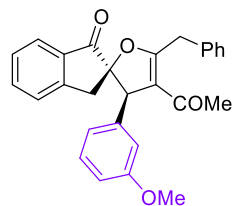

**3s**

Followed the general procedure, using **1a** (0.2 mmol, 29.4 mg), **2e** (0.2 mmol, 55.2 mg) and **L1** (0.02 mmol, 14.0 mg). Purified by flash column chromatography (petroleum ether/ethyl acetate 4:1)

to afforded **3s** as a light yellow oil (63.5 mg, 71% yield, >20:1 dr);  $[\alpha]_{\text{D}}^{20} = -265.0$  ( $c = 3.0$ , DCM, 97% ee);  $^1\text{H NMR}$  (400 MHz,  $\text{CDCl}_3$ )  $\delta$  7.82 (d,  $J = 7.7$  Hz, 1H), 7.60 – 7.52 (m, 1H), 7.48 – 7.35 (m, 3H), 7.35 – 7.27 (m, 2H), 7.27 – 7.16 (m, 3H), 6.83 – 6.76 (m, 1H), 6.75 – 6.26 (m, 2H), 4.52 (s, 1H), 4.20 (dd,  $J = 151.6, 13.3$  Hz, 2H), 3.62 (s, 3H), 2.83 (dd,  $J = 89.7, 17.7$  Hz, 2H), 1.93 (s, 3H);  $^{13}\text{C NMR}$  (101 MHz,  $\text{CDCl}_3$ )  $\delta$  200.5, 194.7, 169.5, 150.9, 141.0, 136.6, 136.0, 133.2, 130.1, 129.1, 128.5, 128.2, 126.7, 126.3, 125.4, 115.7, 93.1, 55.1, 53.7, 36.2, 34.2, 29.8; **HRMS** (ESI):  $m/z$   $[\text{M} + \text{Na}]^+$  calcd for  $[\text{C}_{28}\text{H}_{24}\text{NaO}_4]^+$ : 447.1567, found: 447.1574; **HPLC**: Daicel Chiralpak IC, *n*-hexane/*i*-PrOH = 70/30, flow rate = 1 mL/min,  $\lambda = 254$  nm,  $t_{\text{major}} = 33.41$  min and  $t_{\text{minor}} = 14.05$  min.

**(2R,3R)-4-acetyl-5-benzyl-3-(2-chlorophenyl)-3H-spiro[furan-2,2'-inden]-1'(3'H)-one (3t):**

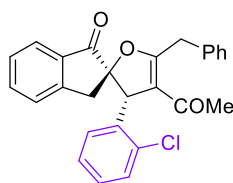

**3t**

Followed the general procedure, using **1a** (0.2 mmol, 29.4 mg), **2f** (0.2 mmol, 56.3 mg) and **L1** (0.02 mmol, 14.0 mg). Purified by flash column chromatography (petroleum ether/ethyl acetate 4:1) to afforded **3t** as a light yellow oil (58.6 mg, 65% yield, 6:1 dr);  $[\alpha]_{\text{D}}^{20} = -109.8$  ( $c = 3.0$ , DCM, 89% ee);  $^1\text{H NMR}$  (400 MHz,  $\text{CDCl}_3$ )  $\delta$  7.82 (d,  $J = 7.7$  Hz, 1H), 7.59 – 7.54 (m, 1H), 7.43 – 7.38 (m, 3H), 7.35 – 7.29 (m, 3H), 7.27 – 7.18 (m, 4H), 7.15 – 7.10 (m, 1H), 5.24 (s, 1H), 4.20 (dd,  $J = 97.7, 14.3$  Hz, 2H), 2.79 (dd,  $J = 94.9, 17.8$  Hz, 2H), 1.91 (s, 3H);  $^{13}\text{C NMR}$  (101 MHz,  $\text{CDCl}_3$ )  $\delta$  200.0, 194.5, 169.8, 150.9, 137.2, 136.3, 136.1, 134.3, 133.1, 129.8, 129.4, 129.1, 129.0, 128.6, 128.2, 127.7, 126.8, 126.2, 125.4, 115.1, 92.6, 49.2, 36.4, 34.2, 29.5; **HRMS** (ESI):  $m/z$   $[\text{M} + \text{Na}]^+$  calcd for  $[\text{C}_{27}\text{H}_{21}\text{ClNaO}_3]^+$ : 451.1071, found: 451.1078; **HPLC**: Daicel Chiralpak IC, *n*-hexane/*i*-PrOH = 70/30, flow rate = 1 mL/min,  $\lambda = 254$  nm,  $t_{\text{major}} = 15.07$  min and  $t_{\text{minor}} = 11.42$  min.

**(2R,3R)-4-acetyl-5-benzyl-3-(2-methoxyphenyl)-3H-spiro[furan-2,2'-inden]-1'(3'H)-one (3u):**

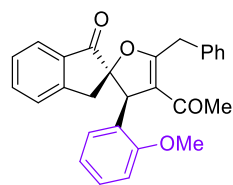

**3u**

Followed the general procedure, using **1a** (0.2 mmol, 29.4 mg), **2g** (0.2 mmol, 55.2 mg) and **L1** (0.02 mmol, 14.0 mg). Purified by flash column chromatography (petroleum ether/ethyl acetate 4:1) to afforded **3u** as a light yellow oil (51.0 mg, 57% yield, >20:1 dr);  $[\alpha]_{\text{D}}^{20} = -70.6$  ( $c = 2.0$ , DCM, 89% ee);  $^1\text{H NMR}$  (400 MHz,  $\text{CDCl}_3$ )  $\delta$  7.83 (d,  $J = 7.6$  Hz, 1H), 7.55 – 7.51 (m, 1H), 7.42 (d,  $J = 7.3$  Hz, 2H), 7.40 – 7.36 (m, 1H), 7.33 – 7.29 (m, 2H), 7.26 – 7.21 (m, 2H), 7.14 (d,  $J = 7.6$  Hz, 1H), 7.06 – 7.03 (m, 1H), 6.93 (t,  $J = 7.4$  Hz, 1H), 6.72 (d,  $J = 8.1$  Hz, 1H), 5.13 (s, 1H), 4.19 (dd,  $J = 107.2, 14.4$  Hz, 2H), 3.24 (s, 3H), 2.75 (dd,  $J = 74.3, 17.7$  Hz, 2H), 1.92 (s, 3H);  $^{13}\text{C NMR}$  (101 MHz,  $\text{CDCl}_3$ )  $\delta$  201.3, 195.2, 169.4, 156.9, 151.2, 136.6, 135.6, 133.6, 129.0, 128.9, 128.5, 128.4, 127.8, 127.4, 126.6, 126.0, 125.0, 121.0, 114.2, 110.1, 92.8, 54.6, 46.9, 36.6, 34.2, 29.4; **HRMS** (ESI):  $m/z$   $[\text{M} + \text{Na}]^+$  calcd for  $[\text{C}_{28}\text{H}_{24}\text{NaO}_4]^+$ : 447.1567, found: 447.1574; **HPLC**: Daicel Chiralpak IC, *n*-hexane/*i*-PrOH = 70/30, flow rate = 1 mL/min,  $\lambda = 254$  nm,  $t_{\text{major}} = 27.71$  min and

$t_{\text{minor}} = 18.73$  min.

**(2R,3R)-4-acetyl-5-benzyl-3-(naphthalen-2-yl)-3H-spiro[furan-2,2'-inden]-1'(3'H)-one (3v):**

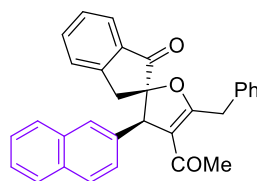

**3v**

Followed the general procedure, using **1a** (0.2 mmol, 29.4 mg), **2h** (0.2 mmol, 59.2 mg) and **L1** (0.02 mmol, 14.0 mg). Purified by flash column chromatography (petroleum ether/ethyl acetate 4:1) to afforded **3v** as a light yellow oil (68.2 mg, 73% yield, >20:1 dr);  $[\alpha]_{\text{D}}^{20} = -280.7$  ( $c = 3.0$ , DCM, 93% ee); **<sup>1</sup>H NMR** (400 MHz, CDCl<sub>3</sub>)  $\delta$  7.87 – 7.76 (m, 3H), 7.70 – 7.65 (m, 1H), 7.54 – 7.44 (m, 6H), 7.40 – 7.33 (m, 3H), 7.30 – 7.25 (m, 1H), 7.20 – 6.93 (m, 2H), 4.73 (s, 1H), 4.26 (dd,  $J = 115.1$ , 14.1 Hz, 2H), 2.82 (dd,  $J = 103.9$ , 17.7 Hz, 2H), 1.92 (s, 3H); **<sup>13</sup>C NMR** (101 MHz, CDCl<sub>3</sub>)  $\delta$  200.5, 194.7, 169.6, 150.8, 136.9, 136.5, 136.1, 133.4, 133.2, 133.0, 129.1, 128.6, 128.3, 127.9, 127.8, 126.8, 126.6, 126.3, 125.4, 116.1, 93.1, 53.9, 36.3, 34.3, 29.9; **HRMS** (ESI):  $m/z$   $[M + \text{Na}]^+$  calcd for  $[\text{C}_{31}\text{H}_{24}\text{NaO}_3]^+$ : 467.1618, found: 467.1616; **HPLC**: Daicel Chiralpak IC, *n*-hexane/*i*-PrOH = 70/30, flow rate = 1 mL/min,  $\lambda = 254$  nm,  $t_{\text{major}} = 28.91$  min and  $t_{\text{minor}} = 13.78$  min.

**(2R,3R)-4-acetyl-5-benzyl-3-(thiophen-2-yl)-3H-spiro[furan-2,2'-inden]-1'(3'H)-one (3w):**

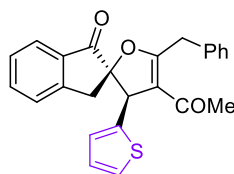

**3w**

Followed the general procedure, using **1a** (0.2 mmol, 29.4 mg), **2i** (0.2 mmol, 50.4 mg) and **L1** (0.02 mmol, 14.0 mg). Purified by flash column chromatography (petroleum ether/ethyl acetate 4:1) to afforded **3w** as a light yellow oil (46.5 mg, 55% yield, 2.5:1 dr);  $[\alpha]_{\text{D}}^{20} = -206.5$  ( $c = 2.0$ , DCM, 98%/98% ee); **<sup>1</sup>H NMR** (400 MHz, CDCl<sub>3</sub>)  $\delta$  7.86 – 7.73 (m, 1H), 7.62 – 7.55 (m, 1H), 7.43 – 7.36 (m, 3H), 7.35 – 7.29 (m, 3H), 7.27 – 7.22 (m, 2H), 6.99 – 6.94 (m, 1H), 6.72 (d,  $J = 3.4$  Hz, 1H), 4.82 (s, 1H), 4.47 – 4.31 (m, 1H), 4.14 – 3.95 (m, 1H), 3.05 – 2.98 (m, 1H), 2.91 – 2.82 (m, 1H), 2.01 (s, 3H); **<sup>13</sup>C NMR** (101 MHz, CDCl<sub>3</sub>)  $\delta$  200.1, 194.3, 169.6, 150.8, 143.9, 136.3, 136.2, 133.2, 129.0, 128.5, 128.3, 127.5, 126.7, 126.4, 126.2, 125.8, 125.4, 116.2, 93.0, 48.7, 35.7, 34.2, 29.5; **HRMS** (ESI):  $m/z$   $[M + \text{Na}]^+$  calcd for  $[\text{C}_{25}\text{H}_{20}\text{NaO}_3\text{S}]^+$ : 423.1025, found: 423.1029; **HPLC**: Daicel Chiralpak IC, *n*-hexane/*i*-PrOH = 70/30, flow rate = 1 mL/min,  $\lambda = 254$  nm, major product:  $t_{\text{major}} = 23.17$  min and  $t_{\text{minor}} = 12.34$  min; minor product:  $t_{\text{major}} = 20.17$  min and  $t_{\text{minor}} = 11.43$  min.

**(2R,3R)-5-benzyl-1'-oxo-3-phenyl-1',3'-dihydro-3H-spiro[furan-2,2'-indene]-4-carbaldehyde (3x):**

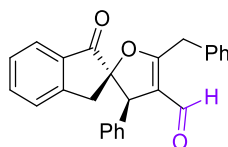

**3x**

Followed the general procedure, using **1a** (0.2 mmol, 29.4 mg), **2j** (0.2 mmol, 46.4 mg) and **L1** (0.02 mmol, 14.0 mg). Purified by flash column chromatography (petroleum ether/ethyl acetate 4:1) to afforded **3x** as a light yellow oil (52.4 mg, 65% yield, >20:1 dr);  $[\alpha]_{\text{D}}^{20} = -303.0$  (c = 2.0, DCM, 98% ee); **<sup>1</sup>H NMR** (400 MHz, CDCl<sub>3</sub>)  $\delta$  9.85 (s, 1H), 7.80 (d,  $J = 7.7$  Hz, 1H), 7.58 – 7.52 (m, 1H), 7.41 – 7.34 (m, 5H), 7.31 – 7.28 (m, 1H), 7.26 – 7.22 (m, 3H), 7.16 (d,  $J = 7.7$  Hz, 1H), 7.00 – 6.90 (m, 2H), 4.54 (s, 1H), 4.08 (dd,  $J = 35.9, 15.1$  Hz, 2H), 2.86 (dd,  $J = 101.7, 17.7$  Hz, 2H); **<sup>13</sup>C NMR** (101 MHz, CDCl<sub>3</sub>)  $\delta$  200.1, 184.2, 174.5, 150.6, 138.2, 136.2, 135.0, 133.2, 128.9, 128.8, 128.8, 128.3, 128.1, 127.7, 127.4, 126.3, 125.4, 119.6, 94.4, 51.3, 35.8, 33.2; **HRMS** (ESI): m/z  $[M + Na]^+$  calcd for [C<sub>26</sub>H<sub>20</sub>NaO<sub>3</sub>]<sup>+</sup>: 403.1305, found: 403.1308; **HPLC**: Daicel Chiralpak IC, *n*-hexane/*i*-PrOH = 70/30, flow rate = 1 mL/min,  $\lambda = 254$  nm,  $t_{\text{major}} = 46.57$  min and  $t_{\text{minor}} = 50.78$  min.

**(2R,3R)-5-benzyl-3-phenyl-4-propionyl-3H-spiro[furan-2,2'-inden]-1'(3'H)-one (3y):**

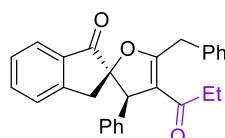

**3y**

Followed the general procedure, using **1a** (0.2 mmol, 29.4 mg), **2k** (0.2 mmol, 52.0 mg) and **L1** (0.02 mmol, 14.0 mg). Purified by flash column chromatography (petroleum ether/ethyl acetate 4:1) to afforded **3y** as a light yellow oil (72.4 mg, 84% yield, 10:1 dr);  $[\alpha]_{\text{D}}^{20} = -272.1$  (c = 2.7, DCM, 99%/92% ee); **<sup>1</sup>H NMR** (400 MHz, CDCl<sub>3</sub>)  $\delta$  7.81 (d,  $J = 7.6$  Hz, 1H), 7.54 (t,  $J = 7.1$  Hz, 1H), 7.46 – 7.41 (m, 2H), 7.38 (t,  $J = 7.4$  Hz, 1H), 7.35 – 7.31 (m, 2H), 7.31 – 7.19 (m, 4H), 7.15 (d,  $J = 7.7$  Hz, 1H), 7.08 – 6.86 (m, 2H), 4.57 (s, 1H), 4.35 (d,  $J = 14.3$  Hz, 1H), 4.08 (d,  $J = 14.3$  Hz, 1H), 2.92 (d,  $J = 17.6$  Hz, 1H), 2.67 (d,  $J = 17.7$  Hz, 1H), 2.47 – 2.32 (m, 1H), 1.98 – 1.84 (m, 1H), 0.89 (t,  $J = 7.2$  Hz, 3H); **<sup>13</sup>C NMR** (101 MHz, CDCl<sub>3</sub>)  $\delta$  200.5, 197.5, 168.9, 150.8, 139.5, 136.6, 136.0, 133.3, 129.7, 129.1, 128.5, 128.2, 127.9, 126.6, 126.3, 125.3, 115.6, 93.1, 53.4, 36.2, 34.6, 34.2, 7.6; **HRMS** (ESI): m/z  $[M + Na]^+$  calcd for [C<sub>28</sub>H<sub>24</sub>NaO<sub>3</sub>]<sup>+</sup>: 431.1618, found: 431.1621; **HPLC**: Daicel Chiralpak ID, *n*-hexane/*i*-PrOH = 80/20, flow rate = 1 mL/min,  $\lambda = 254$  nm, major product:  $t_{\text{major}} = 18.90$  min and  $t_{\text{minor}} = 23.60$  min; minor product:  $t_{\text{major}} = 17.56$  min and  $t_{\text{minor}} = 13.62$  min.

**(2R,3R)-5-benzyl-4-butyryl-3-phenyl-3H-spiro[furan-2,2'-inden]-1'(3'H)-one (3z):**

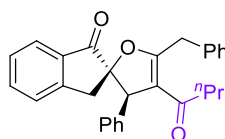

**3z**

Followed the general procedure, using **1a** (0.2 mmol, 29.4 mg), **2l** (0.2 mmol, 54.8 mg) and **L1** (0.02 mmol, 14.0 mg). Purified by flash column chromatography (petroleum ether/ethyl acetate 4:1) to afforded **3z** as a light yellow oil (67.7 mg, 76% yield, 5:1 dr);  $[\alpha]_{\text{D}}^{20} = -255.1$  (c = 2.0, DCM, 94%/53% ee); **<sup>1</sup>H NMR** (400 MHz, CDCl<sub>3</sub>)  $\delta$  7.81 (d,  $J = 7.6$  Hz, 1H), 7.57 – 7.51 (m, 1H), 7.45 – 7.36 (m, 3H), 7.34 – 7.30 (m, 2H), 7.29 – 7.21 (m, 4H), 7.16 (d,  $J = 7.6$  Hz, 1H), 7.10 – 6.84 (m, 2H), 4.58 (s, 1H), 4.33 (d,  $J = 14.3$  Hz, 1H), 4.08 (d,  $J = 14.3$  Hz, 1H), 2.80 (dd,  $J = 97.3, 17.6$  Hz, 2H), 2.41 – 2.26 (m, 1H), 2.00 – 1.84 (m, 1H), 1.58 – 1.33 (m, 2H), 0.72 (t,  $J = 7.4$  Hz, 3H); **<sup>13</sup>C NMR** (101 MHz, CDCl<sub>3</sub>)  $\delta$  200.6, 197.1, 168.9, 150.8, 139.5, 136.6, 136.0, 133.3, 129.0, 129.0, 128.7, 128.5, 128.2, 127.9, 126.6, 126.3, 125.3, 115.8, 93.0, 53.5, 43.3, 36.2, 34.2, 17.1, 13.7; **HRMS** (ESI): m/z  $[M + Na]^+$  calcd for [C<sub>29</sub>H<sub>26</sub>NaO<sub>3</sub>]<sup>+</sup>: 445.1774, found: 445.1781; **HPLC**: Daicel

Chiralpak IC, *n*-hexane/*i*-PrOH = 70/30, flow rate = 1 mL/min,  $\lambda$  = 254 nm, major product:  $t_{\text{major}}$  = 9.34 min and  $t_{\text{minor}}$  = 7.33 min; minor product:  $t_{\text{major}}$  = 6.03 min and  $t_{\text{minor}}$  = 8.75 min.

**(2*R*,3*R*)-4-benzoyl-5-benzyl-5'-methyl-3-phenyl-3*H*-spiro[furan-2,2'-inden]-1'(3'*H*)-one (3aa):**

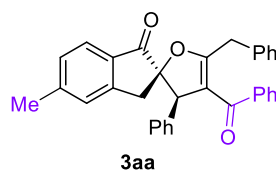

Followed the general procedure, using **1e** (0.2 mmol, 32.4 mg), **2m** (0.2 mmol, 61.3 mg) and **L1** (0.02 mmol, 14.0 mg). Purified by flash column chromatography (petroleum ether/ethyl acetate 4:1) to afforded **3aa** as a light yellow oil (65.8 mg, 70% yield, >20:1 dr);  $[\alpha]_{\text{D}}^{20}$  = -66.2 ( $c$  = 2.0, DCM, 96% ee); **<sup>1</sup>H NMR** (400 MHz, CDCl<sub>3</sub>)  $\delta$  7.72 (d,  $J$  = 7.9 Hz, 1H), 7.65 – 7.56 (m, 2H), 7.42 – 7.35 (m, 1H), 7.34 – 7.25 (m, 6H), 7.25 – 7.13 (m, 5H), 6.97 – 6.84 (m, 3H), 4.79 (s, 1H), 3.83 (dd,  $J$  = 48.3, 14.9 Hz, 2H), 2.83 (dd,  $J$  = 77.9, 17.7 Hz, 2H), 2.35 (s, 3H); **<sup>13</sup>C NMR** (101 MHz, CDCl<sub>3</sub>)  $\delta$  200.5, 192.5, 168.5, 151.5, 147.6, 140.5, 139.0, 136.2, 131.3, 131.1, 129.5, 129.0, 128.7, 128.5, 128.3, 127.9, 127.4, 126.7, 126.7, 125.1, 117.3, 93.2, 55.0, 35.9, 34.4, 22.2; **HRMS** (ESI):  $m/z$  [M + Na]<sup>+</sup> calcd for [C<sub>33</sub>H<sub>26</sub>NaO<sub>3</sub>]<sup>+</sup>: 493.1774, found: 493.1767; **HPLC**: Daicel Chiralpak IC, *n*-hexane/*i*-PrOH = 70/30, flow rate = 1 mL/min,  $\lambda$  = 254 nm,  $t_{\text{major}}$  = 14.61 min and  $t_{\text{minor}}$  = 24.32 min.

**Methyl3-((2*R*,3*R*)-4-acetyl-1'-oxo-3-phenyl-1',3'-dihydro-3*H*-spiro[furan-2,2'-inden]-5-yl)methyl)benzoate (3ab):**

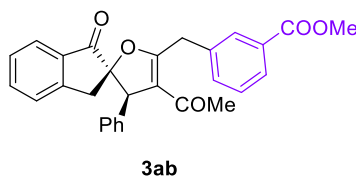

Followed the general procedure, using **1a** (0.2 mmol, 29.4 mg), **2n** (0.2 mmol, 60.8 mg) and **L1** (0.02 mmol, 14.0 mg). Purified by flash column chromatography (petroleum ether/ethyl acetate 4:1) to afforded **3ab** as a light yellow oil (67.5 mg, 71% yield, >20:1 dr);  $[\alpha]_{\text{D}}^{20}$  = -253.5 ( $c$  = 3.0, DCM, 96% ee); **<sup>1</sup>H NMR** (400 MHz, CDCl<sub>3</sub>)  $\delta$  8.10 (s, 1H), 7.93 (d,  $J$  = 7.7 Hz, 1H), 7.81 (d,  $J$  = 7.6 Hz, 1H), 7.71 – 7.62 (m, 1H), 7.56 (t,  $J$  = 7.4 Hz, 1H), 7.45 – 7.37 (m, 2H), 7.35 – 7.26 (m, 3H), 7.21 – 7.15 (m, 1H), 7.11 – 6.88 (m, 2H), 4.57 (s, 1H), 4.26 (dd,  $J$  = 77.0, 14.4 Hz, 2H), 3.91 (s, 3H), 2.82 (dd,  $J$  = 95.9, 17.6 Hz, 2H), 1.90 (s, 3H); **<sup>13</sup>C NMR** (101 MHz, CDCl<sub>3</sub>)  $\delta$  200.3, 194.8, 168.6, 167.1, 150.7, 139.2, 136.8, 136.1, 133.6, 133.2, 130.4, 130.1, 129.2, 128.6, 128.3, 128.1, 128.0, 126.3, 125.4, 116.1, 93.2, 53.7, 52.1, 36.2, 33.9, 29.8; **HRMS** (ESI):  $m/z$  [M + Na]<sup>+</sup> calcd for [C<sub>29</sub>H<sub>24</sub>NaO<sub>5</sub>]<sup>+</sup>: 475.1516, found: 475.1520; **HPLC**: Daicel Chiralpak IC, *n*-hexane/*i*-PrOH = 70/30, flow rate = 1 mL/min,  $\lambda$  = 254 nm,  $t_{\text{major}}$  = 42.66 min and  $t_{\text{minor}}$  = 25.21 min.

**(2*R*,3*R*)-4-acetyl-5-(4-ethylbenzyl)-3-phenyl-3*H*-spiro[furan-2,2'-inden]-1'(3'*H*)-one (3ac):**

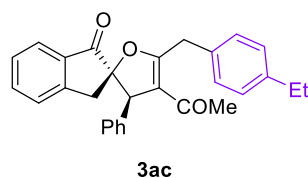

Followed the general procedure, using **1a** (0.2 mmol, 29.4 mg), **2o** (0.2 mmol, 54.8 mg) and **L1** (0.02 mmol, 14.0 mg). Purified by flash column chromatography (petroleum ether/ethyl acetate 4:1)

to afforded **3ac** as a light yellow oil (73.0 mg, 82% yield, >20:1 dr);  $[\alpha]_D^{20} = -177.7$  ( $c = 3.0$ , DCM, 97% ee); **<sup>1</sup>H NMR** (400 MHz, CDCl<sub>3</sub>)  $\delta$  7.81 (d,  $J = 7.7$  Hz, 1H), 7.57 – 7.52 (m, 1H), 7.42 – 7.36 (m, 1H), 7.35 – 7.31 (m, 2H), 7.30 – 7.24 (m, 3H), 7.18 – 7.12 (m, 3H), 7.07 – 6.86 (m, 2H), 4.57 (s, 1H), 4.17 (dd,  $J = 92.4, 14.4$  Hz, 2H), 2.81 (dd,  $J = 101.2, 17.8$  Hz, 2H), 2.66 – 2.58 (m, 2H), 1.91 (s, 3H), 1.23 (t,  $J = 7.6$  Hz, 3H); **<sup>13</sup>C NMR** (101 MHz, CDCl<sub>3</sub>)  $\delta$  200.5, 194.6, 169.7, 150.8, 142.6, 139.4, 136.0, 133.5, 133.3, 129.1, 128.9, 128.2, 128.0, 127.9, 126.3, 125.3, 116.0, 93.1, 53.8, 36.2, 33.8, 29.8, 28.5, 15.6; **HRMS** (ESI):  $m/z$  [M + Na]<sup>+</sup> calcd for [C<sub>29</sub>H<sub>26</sub>NaO<sub>3</sub>]<sup>+</sup>: 445.1774, found: 445.1783; **HPLC**: Daicel Chiralpak IC, *n*-hexane/*i*-PrOH = 70/30, flow rate = 1 mL/min,  $\lambda = 254$  nm,  $t_{\text{major}} = 26.14$  min and  $t_{\text{minor}} = 14.55$  min.

**(2*R*,3*R*)-4-acetyl-5-(2-chlorobenzyl)-3-phenyl-3*H*-spiro[furan-2,2'-inden]-1'(3'*H*)-one (3ad):**

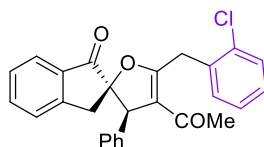

**3ad**

Followed the general procedure, using **1a** (0.2 mmol, 29.4 mg), **2p** (0.2 mmol, 56.3 mg) and **L1** (0.02 mmol, 14.0 mg). Purified by flash column chromatography (petroleum ether/ethyl acetate 4:1) to afforded **3ad** as a light yellow oil (72.2 mg, 80% yield, >20:1 dr);  $[\alpha]_D^{20} = -246.2$  ( $c = 3.0$ , DCM, 95% ee); **<sup>1</sup>H NMR** (400 MHz, CDCl<sub>3</sub>)  $\delta$  7.80 (d,  $J = 7.7$  Hz, 1H), 7.56 – 7.50 (m, 2H), 7.42 – 7.29 (m, 5H), 7.27 – 7.23 (m, 1H), 7.19 – 7.13 (m, 2H), 7.13 – 6.81 (m, 2H), 4.58 (s, 1H), 4.44 – 4.34 (m, 2H), 2.83 (dd,  $J = 93.6, 17.7$  Hz, 2H), 1.92 (s, 3H); **<sup>13</sup>C NMR** (101 MHz, CDCl<sub>3</sub>)  $\delta$  200.6, 194.5, 168.1, 150.7, 139.3, 136.1, 134.2, 134.0, 133.2, 130.4, 129.3, 129.2, 128.2, 128.1, 128.0, 127.0, 126.3, 125.3, 117.0, 93.2, 53.9, 36.2, 32.1, 29.7; **HRMS** (ESI):  $m/z$  [M + Na]<sup>+</sup> calcd for [C<sub>27</sub>H<sub>21</sub>ClNaO<sub>3</sub>]<sup>+</sup>: 451.1071, found: 451.1077; **HPLC**: Daicel Chiralpak IC, *n*-hexane/*i*-PrOH = 70/30, flow rate = 1 mL/min,  $\lambda = 254$  nm,  $t_{\text{major}} = 21.77$  min and  $t_{\text{minor}} = 11.16$  min.

**(2*R*,3*R*)-4-acetyl-3-phenyl-5-(thiophen-2-ylmethyl)-3*H*-spiro[furan-2,2'-inden]-1'(3'*H*)-one (3ae):**

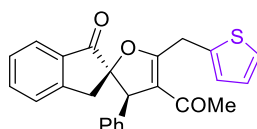

**3ae**

Followed the general procedure, using **1a** (0.2 mmol, 29.4 mg), **2q** (0.2 mmol, 50.4 mg) and **L1** (0.02 mmol, 14.0 mg). Purified by flash column chromatography (petroleum ether/ethyl acetate 4:1) to afforded **3ae** as a light yellow oil (58.4 mg, 69% yield, >20:1 dr);  $[\alpha]_D^{20} = -285.8$  ( $c = 2.0$ , DCM, 97% ee); **<sup>1</sup>H NMR** (400 MHz, CDCl<sub>3</sub>)  $\delta$  7.82 (d,  $J = 7.7$  Hz, 1H), 7.58 – 7.53 (m, 1H), 7.42 – 7.38 (m, 1H), 7.35 – 7.26 (m, 3H), 7.20 – 7.16 (m, 2H), 7.13 – 6.97 (m, 3H), 6.96 – 6.93 (m, 1H), 4.58 (s, 1H), 4.38 (dd,  $J = 139.2, 14.9$  Hz, 2H), 2.84 (dd,  $J = 109.1, 17.7$  Hz, 2H), 1.90 (s, 3H); **<sup>13</sup>C NMR** (101 MHz, CDCl<sub>3</sub>)  $\delta$  200.4, 194.6, 168.0, 150.8, 139.2, 137.8, 136.1, 133.3, 129.2, 128.3, 128.0, 126.8, 126.3, 126.3, 125.4, 124.4, 115.6, 93.3, 53.7, 36.3, 29.7, 28.7; **HRMS** (ESI):  $m/z$  [M + Na]<sup>+</sup> calcd for [C<sub>25</sub>H<sub>20</sub>NaO<sub>3</sub>S]<sup>+</sup>: 423.1025, found: 423.1029; **HPLC**: Daicel Chiralpak IC, *n*-hexane/*i*-PrOH = 70/30, flow rate = 1 mL/min,  $\lambda = 254$  nm,  $t_{\text{major}} = 30.73$  min and  $t_{\text{minor}} = 13.43$  min.

**(2*R*,3*R*)-4-acetyl-5'-methyl-5-pentyl-3-phenyl-3*H*-spiro[furan-2,2'-inden]-1'(3'*H*)-one (3af):**

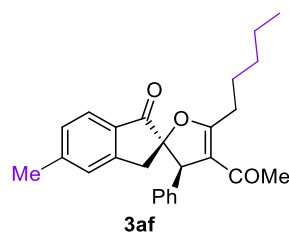

Followed the general procedure, using **1e** (0.2 mmol, 32.4 mg), **2r** (0.2 mmol, 45.4 mg) and **L1** (0.02 mmol, 14.0 mg). Purified by flash column chromatography (petroleum ether/ethyl acetate 4:1) to afforded **3af** as a light yellow oil (42.7 mg, 55% yield, >20:1 dr);  $[\alpha]_D^{20} = -156.8$  (c = 2.0, DCM, 96% ee); **<sup>1</sup>H NMR** (400 MHz, CDCl<sub>3</sub>)  $\delta$  7.64 (d,  $J = 7.9$  Hz, 1H), 7.31 – 7.18 (m, 3H), 7.14 (d,  $J = 7.9$  Hz, 1H), 7.09 – 6.94 (m, 2H), 6.92 (s, 1H), 4.43 (s, 1H), 2.88 – 2.82 (m, 1H), 2.82 – 2.68 (m, 2H), 2.64 – 2.55 (m, 1H), 2.32 (s, 3H), 1.81 (s, 3H), 1.67 – 1.56 (m, 2H), 1.39 – 1.26 (m, 4H), 0.84 (t,  $J = 7.1$  Hz, 3H); **<sup>13</sup>C NMR** (101 MHz, CDCl<sub>3</sub>)  $\delta$  199.0, 193.5, 171.5, 150.2, 146.5, 138.7, 129.9, 128.4, 128.0, 126.7, 125.6, 124.1, 114.4, 92.0, 52.7, 35.1, 30.6, 28.7, 27.3, 25.5, 21.3, 21.2, 13.0; **HRMS** (ESI):  $m/z$  [M + Na]<sup>+</sup> calcd for [C<sub>26</sub>H<sub>28</sub>NaO<sub>3</sub>]<sup>+</sup>: 411.1931, found: 411.1927; **HPLC**: Daicel Chiralpak IC, *n*-hexane/*i*-PrOH = 70/30, flow rate = 1 mL/min,  $\lambda = 254$  nm,  $t_{\text{major}} = 20.38$  min and  $t_{\text{minor}} = 8.37$  min.

**(2R,3R)-4-acetyl-5-benzyl-5'-bromo-3-(4-chlorophenyl)-3H-spiro[furan-2,2'-inden]-1'(3'H)-one (3ag):**

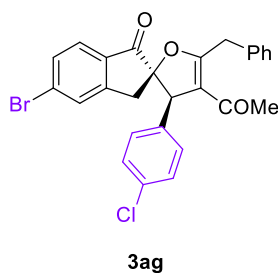

Followed the general procedure, using **1d** (0.2 mmol, 45.2 mg), **2b** (0.2 mmol, 56.4 mg) and **L1** (0.02 mmol, 14.0 mg). Purified by flash column chromatography (petroleum ether/ethyl acetate 4:1) to afforded **3ag** as a light yellow oil (79.4 mg, 75% yield, >20:1 dr);  $[\alpha]_D^{20} = -147.9$  (c = 3.0, DCM, 98% ee); **<sup>1</sup>H NMR** (400 MHz, CDCl<sub>3</sub>)  $\delta$  7.65 (d,  $J = 8.2$  Hz, 1H), 7.56 – 7.52 (m, 1H), 7.44 – 7.36 (m, 3H), 7.35 – 7.28 (m, 3H), 7.28 – 7.23 (m, 2H), 6.98 – 6.88 (m, 2H), 4.53 (s, 1H), 4.18 (dd,  $J = 86.3, 14.4$  Hz, 2H), 2.79 (dd,  $J = 105.4, 17.9$  Hz, 2H), 1.95 (s, 3H); **<sup>13</sup>C NMR** (101 MHz, CDCl<sub>3</sub>)  $\delta$  199.0, 194.0, 169.4, 151.9, 137.7, 136.0, 134.0, 132.1, 132.0, 131.7, 129.6, 129.5, 128.9, 128.6, 126.9, 126.5, 116.1, 92.6, 53.1, 35.8, 34.2, 29.7; **HRMS** (ESI):  $m/z$  [M + Na]<sup>+</sup> calcd for [C<sub>27</sub>H<sub>20</sub>BrClNaO<sub>3</sub>]<sup>+</sup>: 529.0177, found: 529.0187; **HPLC**: Daicel Chiralpak IC, *n*-hexane/*i*-PrOH = 70/30, flow rate = 1 mL/min,  $\lambda = 254$  nm,  $t_{\text{major}} = 31.28$  min and  $t_{\text{minor}} = 17.28$  min.

**(2R,3R)-4-acetyl-5-(2-chlorobenzyl)-6'-methoxy-3-phenyl-3H-spiro[furan-2,2'-inden]-1'(3'H)-one (3ah):**

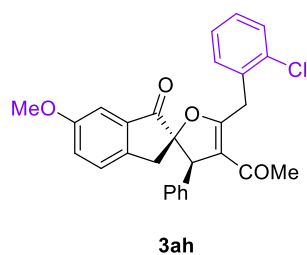

Followed the general procedure, using **1k** (0.2 mmol, 35.4 mg), **2p** (0.2 mmol, 56.3 mg) and **L1** (0.02 mmol, 14.0 mg). Purified by flash column chromatography (petroleum ether/ethyl acetate 4:1) to afforded **3ah** as a light yellow oil (80.8 mg, 84% yield, >20:1 dr);  $[\alpha]_{\text{D}}^{20} = -170.2$  (c = 3.0, DCM, 92% ee);  $^1\text{H NMR}$  (400 MHz,  $\text{CDCl}_3$ )  $\delta$  7.57 – 7.52 (m, 1H), 7.37 – 7.27 (m, 4H), 7.26 – 7.23 (m, 1H), 7.23 – 7.21 (m, 1H), 7.20 – 7.17 (m, 1H), 7.17 – 7.13 (m, 1H), 7.13 – 7.09 (m, 1H), 7.09 – 7.00 (m, 2H), 4.57 (s, 1H), 4.45 – 4.31 (m, 2H), 3.82 (s, 3H), 2.75 (dd,  $J = 93.8, 17.3$  Hz, 2H), 1.92 (s, 3H);  $^{13}\text{C NMR}$  (101 MHz,  $\text{CDCl}_3$ )  $\delta$  200.6, 194.5, 168.2, 159.9, 143.6, 139.3, 134.3, 134.2, 134.0, 130.4, 129.3, 129.1, 128.1, 128.0, 127.0, 127.0, 125.4, 116.9, 106.4, 93.9, 55.7, 54.1, 35.5, 32.1, 29.7; **HRMS** (ESI):  $m/z$   $[\text{M} + \text{Na}]^+$  calcd for  $[\text{C}_{28}\text{H}_{23}\text{ClNaO}_4]^+$ : 481.1177, found: 481.1181; **HPLC**: Daicel Chiralpak IC, *n*-hexane/*i*-PrOH = 70/30, flow rate = 1 mL/min,  $\lambda = 254$  nm,  $t_{\text{major}} = 37.74$  min and  $t_{\text{minor}} = 12.65$  min.

**(2*R*,3*R*)-4-acetyl-5'-chloro-5-(3,4-dichlorobenzyl)-3-phenyl-3*H*-spiro[furan-2,2'-inden]-1'(3'*H*)-one (3ai):**

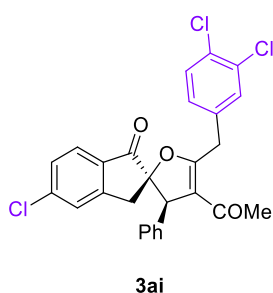

Followed the general procedure, using **1c** (0.2 mmol, 36.5 mg), **2s** (0.2 mmol, 63.4 mg) and **L1** (0.02 mmol, 14.0 mg). Purified by flash column chromatography (petroleum ether/ethyl acetate 4:1) to afforded **3ai** as a light yellow oil (81.0 mg, 78% yield, >20:1 dr);  $[\alpha]_{\text{D}}^{20} = -156.7$  (c = 3.0, DCM, 99% ee);  $^1\text{H NMR}$  (400 MHz,  $\text{CDCl}_3$ )  $\delta$  7.75 (d,  $J = 8.2$  Hz, 1H), 7.53 – 7.48 (m, 1H), 7.41 – 7.37 (m, 2H), 7.36 – 7.28 (m, 3H), 7.27 – 7.24 (m, 1H), 7.21 – 7.16 (m, 1H), 7.04 – 6.90 (m, 2H), 4.54 (s, 1H), 4.21 – 4.07 (m, 2H), 2.80 (dd,  $J = 92.5, 17.9$  Hz, 2H), 1.88 (s, 3H);  $^{13}\text{C NMR}$  (101 MHz,  $\text{CDCl}_3$ )  $\delta$  198.9, 194.8, 167.9, 152.0, 142.8, 138.7, 136.5, 132.4, 131.5, 131.0, 130.8, 130.4, 129.4, 129.2, 128.5, 128.3, 126.6, 126.5, 117.0, 116.1, 93.2, 53.7, 35.9, 33.2, 29.8; **HRMS** (ESI):  $m/z$   $[\text{M} + \text{Na}]^+$  calcd for  $[\text{C}_{27}\text{H}_{19}\text{Cl}_3\text{NaO}_3]^+$ : 519.0292, found: 519.0300; **HPLC**: Daicel Chiralpak IC, *n*-hexane/*i*-PrOH = 70/30, flow rate = 1 mL/min,  $\lambda = 254$  nm,  $t_{\text{major}} = 14.98$  min and  $t_{\text{minor}} = 8.89$  min.

**Scale-up reaction**

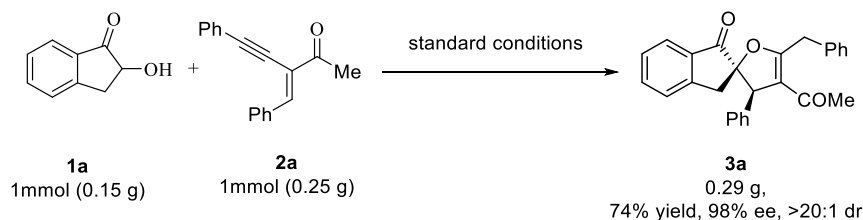

Under a nitrogen atmosphere, a solution of diethylzinc (200  $\mu\text{L}$ , 1.0 M in hexane, 0.2 mmol) was added dropwise to a solution of **L1** (0.1 mmol, 70 mg) in toluene (6 mL). After the mixture was stirred for 30 min at 40  $^{\circ}\text{C}$ . Then,  $\alpha$ -hydroxy-1-indanone **1a** (1.0 mmol, 0.15 g), yne-enone **2a** (1.0 mmol, 0.25 g) and 2-Br-4-ClPhOH (0.2 mmol, 41.6 mg) were added. The reaction mixture was stirred for 48 h at 40  $^{\circ}\text{C}$ . The reaction was quenched with  $\text{NH}_4\text{Cl}$  solution (10 mL), and the aqueous layer was extracted with  $\text{CH}_2\text{Cl}_2$  (3  $\times$  5 mL). The combined organic layer was washed with brine



and dried over Na<sub>2</sub>SO<sub>4</sub>. The solvent was removed under reduced pressure by using a rotary evaporator. The residue was purified by flash chromatography with petroleum ether/ethyl acetate (5/1) to afford the desired product **3a** (0.29 g) as a yellow oil.

### The late-stage functionalization

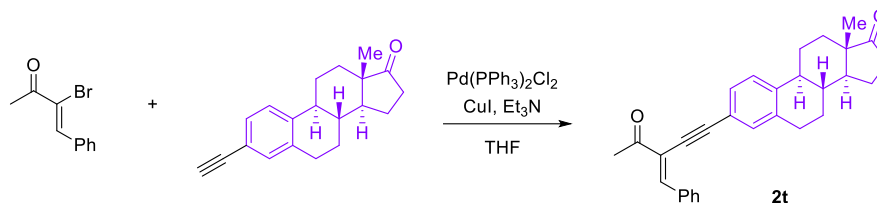

Followed the literature,<sup>2</sup> the  $\alpha$ -bromo- $\alpha,\beta$ -enone was dissolved in anhydrous THF (0.2 M), followed by addition of Pd(PPh<sub>3</sub>)<sub>2</sub>Cl<sub>2</sub> (0.02 equiv.) and CuI (0.04 equiv.). The reaction mixture was cooled to 0 °C and degassed with argon. Alkyne<sup>3</sup> (1.5 equiv.) and Et<sub>3</sub>N (3.0 equiv.) was added and the mixture was stirred overnight at ambient temperature. Upon completion, the reaction mixture was diluted with H<sub>2</sub>O (40 mL). The aqueous phase was extracted with Et<sub>2</sub>O (3 x 40 mL), washed with brine and the combined organic phase was dried over MgSO<sub>4</sub>. Then, it was filtered and the solvent removed.

**(8R,9S,13S,14S)-3-(3-((E)-benzylidene)-4-oxopent-1-yn-1-yl)-13-methyl-6,7,8,9,11,12,13,14,15,16-decahydro-17H-cyclopenta[*a*]phenanthren-17-one (2t):**

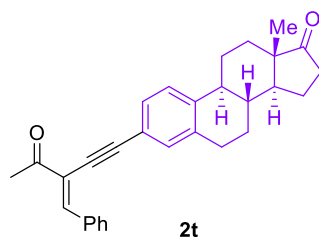

Light yellow solid in 70% isolated yield; **m.p.** = 182.5-183.0 °C; <sup>1</sup>H NMR (400 MHz, CDCl<sub>3</sub>)  $\delta$  8.14 – 8.03 (m, 2H), 7.79 (s, 1H), 7.47 – 7.38 (m, 3H), 7.36 – 7.27 (m, 3H), 2.98 – 2.87 (m, 2H), 2.60 (s, 3H), 2.56 – 2.47 (m, 1H), 2.47 – 2.38 (m, 1H), 2.36 – 2.28 (m, 1H), 2.22 – 2.10 (m, 1H), 2.09 – 1.96 (m, 3H), 1.67 – 1.45 (m, 6H), 0.92 (s, 3H); <sup>13</sup>C NMR (101 MHz, CDCl<sub>3</sub>)  $\delta$  220.6, 196.3, 142.5, 141.2, 137.0, 134.6, 131.8, 130.7, 130.7, 128.8, 128.6, 125.7, 120.1, 120.1, 99.4, 86.5, 50.5, 47.9, 44.5, 38.0, 35.8, 31.6, 29.2, 28.2, 26.3, 25.6, 21.6, 13.9; **HRMS** (ESI): *m/z* [M + H]<sup>+</sup> calcd for [C<sub>30</sub>H<sub>31</sub>O<sub>2</sub>]<sup>+</sup>: 423.2319, found: 423.2321.

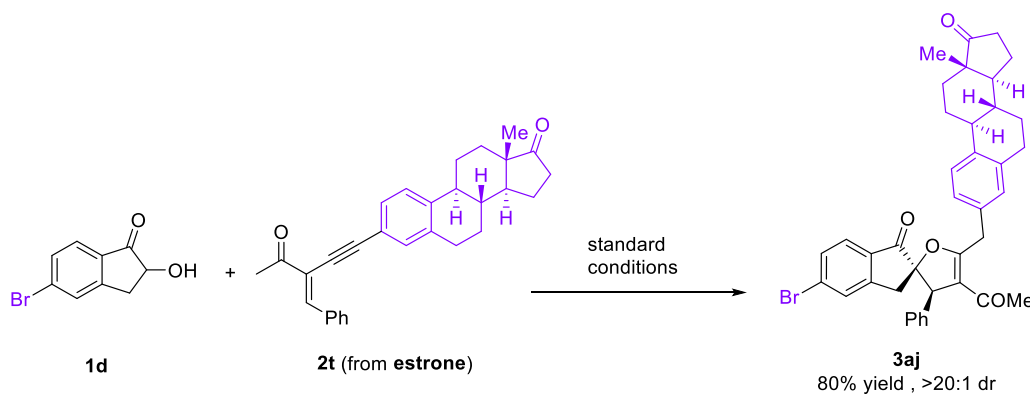

Under a nitrogen atmosphere, a solution of diethylzinc (40  $\mu$ L, 1.0 M in hexane, 0.04 mmol)

was added dropwise to a solution of **L1** (0.02 mmol, 14.0 mg) in toluene (4 mL). After the mixture was stirred for 30 min at 40 °C. Then,  $\alpha$ -hydroxy-1-indanone **1d** (0.2 mmol, 45.2 mg), yne-enone **2t** (0.2 mmol, 84.4 mg) and 2-Br-4-ClPhOH (0.04 mmol, 8.28 mg) were added. The reaction mixture was stirred for 48 h at 40 °C. The reaction was quenched with NH<sub>4</sub>Cl solution (4 mL), and the aqueous layer was extracted with CH<sub>2</sub>Cl<sub>2</sub> (3 × 5 mL). The combined organic layer was washed with brine and dried over Na<sub>2</sub>SO<sub>4</sub>. The solvent was removed under reduced pressure by using a rotary evaporator. The residue was purified by flash chromatography with petroleum ether/ethyl acetate (5/1) to afford the desired product **3aj** as a white solid.

**(2R,3R)-4-acetyl-5'-bromo-5-(((8R,9S,13S,14S)-13-methyl-17-oxo-7,8,9,11,12,13,14,15,16,17-decahydro-6H-cyclopenta[a]phenanthren-3-yl)methyl)-3-phenyl-3H-spiro[furan-2,2'-indan]-1'(3'H)-one (3aj):**

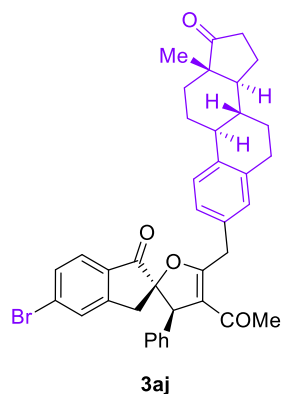

White solid in 80% isolated yield (107.4 mg, >20:1 dr); **m.p.** = 174.6-175.0 °C;  $[\alpha]_D^{20}$  = -38.9 (c = 1.0, DCM, >20:1 dr); **<sup>1</sup>H NMR** (400 MHz, CDCl<sub>3</sub>)  $\delta$  7.66 (d, *J* = 8.2 Hz, 1H), 7.52 (d, *J* = 8.2 Hz, 1H), 7.36 – 7.28 (m, 4H), 7.23 (s, 1H), 7.19 – 7.16 (m, 1H), 7.13 (s, 1H), 7.10 – 6.95 (m, 2H), 4.57 (s, 1H), 4.14 (dd, *J* = 48.9, 14.7 Hz, 2H), 2.96 – 2.89 (m, 3H), 2.74 – 2.65 (m, 1H), 2.55 – 2.39 (m, 2H), 2.32 – 2.24 (m, 1H), 2.20 – 1.98 (m, 4H), 1.93 (s, 3H), 1.70 – 1.54 (m, 3H), 1.52 – 1.43 (m, 3H), 0.91 (s, 3H); **<sup>13</sup>C NMR** (101 MHz, CDCl<sub>3</sub>)  $\delta$  221.0, 199.4, 194.4, 169.2, 152.2, 139.2, 138.1, 136.6, 133.5, 132.2, 132.0, 131.6, 129.6, 129.5, 129.2, 128.1, 126.5, 126.2, 125.6, 116.2, 92.8, 53.8, 50.5, 48.0, 44.4, 38.2, 36.0, 35.9, 33.6, 31.6, 29.8, 29.4, 26.6, 25.7, 21.6, 13.9; **HRMS** (ESI): *m/z* [M + Na]<sup>+</sup> calcd for [C<sub>39</sub>H<sub>37</sub>BrNaO<sub>4</sub>]<sup>+</sup>: 671.1767, found: 671.1776.

## Derivatization

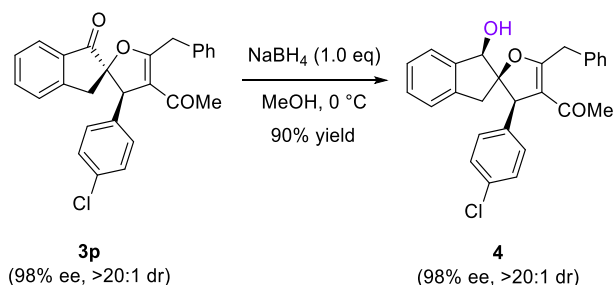

The mixture of **3p** (42.8 mg, 0.1 mmol, 1.0 eq) in MeOH (2 mL) was treated with NaBH<sub>4</sub> (3.8 mg, 0.1 mmol, 1.0 eq) at 0 °C. The reaction was allowed to stir at the same temperature for 24 h. Upon completion as shown by TLC, the reaction mixture was washed with brine (2 mL) and extracted using dichloromethane (3 x 2 mL). The organic layer was dried over Na<sub>2</sub>SO<sub>4</sub> and concentrated in vacuo. The residue was purified by flash chromatography with petroleum ether/ethyl acetate (3/1) to provide the product **4** as a yellow oil.

**1-((1'*R*,2*R*,3*R*)-5-benzyl-3-(4-chlorophenyl)-1'-hydroxy-1',3'-dihydro-3*H*-spiro[furan-2,2'-inden]-4-yl)ethan-1-one (4):**

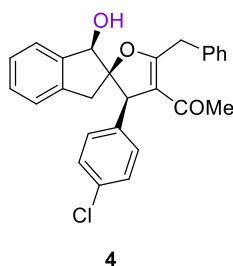

Light yellow oil in 90% isolated yield (38.8 mg, >20:1 dr);  $[\alpha]_D^{20} = -40.4$  ( $c = 0.9$ , DCM, 98% ee); **<sup>1</sup>H NMR** (400 MHz, CDCl<sub>3</sub>)  $\delta$  7.37 – 7.31 (m, 3H), 7.31 – 7.26 (m, 4H), 7.26 – 7.24 (m, 1H), 7.23 – 7.20 (m, 2H), 7.04 – 6.94 (m, 3H), 4.89 (s, 1H), 4.48 – 4.41 (m, 1H), 4.37 (s, 1H), 3.89 – 3.81 (m, 1H), 2.80 – 2.72 (m, 1H), 2.40 – 2.29 (m, 1H), 1.90 (s, 3H), 1.85 (s, 1H); **<sup>13</sup>C NMR** (101 MHz, CDCl<sub>3</sub>)  $\delta$  194.8, 169.6, 141.1, 138.9, 138.5, 136.9, 133.6, 129.2, 128.9, 127.4, 127.2, 124.7, 124.4, 115.9, 112.0, 99.1, 82.5, 54.0, 38.3, 34.1, 29.8; **HRMS** (ESI):  $m/z$  [M + H]<sup>+</sup> calcd for [C<sub>27</sub>H<sub>24</sub>ClO<sub>3</sub>]<sup>+</sup>: 431.1408, found: 431.1409; **HPLC**: Daicel Chiralpak IC, *n*-hexane/*i*-PrOH = 70/30, flow rate = 1 mL/min,  $\lambda = 254$  nm,  $t_{\text{major}} = 9.89$  min and  $t_{\text{minor}} = 9.00$  min.

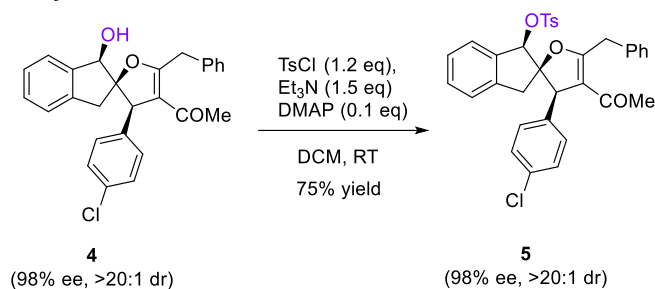

The mixture of **4** (43.1 mg, 0.1 mmol, 1.0 eq), Et<sub>3</sub>N (15.1 mg, 0.15 mmol, 1.2 eq) and DMAP (1.2 mg, 0.12 mmol, 0.1 eq) in DCM (2 mL) was treated with TsCl (22.9 mg, 0.12 mmol, 1.2 eq) at 0 °C. The reaction was allowed to stir at room temperature for 36 h. Upon completion as shown by TLC, the reaction mixture was washed with saturated NH<sub>4</sub>Cl (1 mL) and extracted using dichloromethane (3 x 1 mL). The organic layer was dried over Na<sub>2</sub>SO<sub>4</sub> and concentrated in vacuo. The residue was purified by flash chromatography with petroleum ether/ethyl acetate (3/1) to provide the product **5** as a light yellow oil.

**(1'*R*,2*R*,3*R*)-4-acetyl-5-benzyl-3-(4-chlorophenyl)-1',3'-dihydro-3*H*-spiro[furan-2,2'-inden]-1'-yl 4-methylbenzenesulfonate (5):**

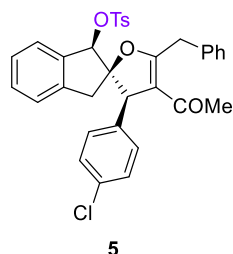

Light yellow oil in 75% isolated yield (45.5 mg, >20:1 dr);  $[\alpha]_D^{20} = -152.6$  ( $c = 2.0$ , DCM, 98% ee); **<sup>1</sup>H NMR** (400 MHz, CDCl<sub>3</sub>)  $\delta$  7.77 – 7.62 (m, 2H), 7.30 – 7.27 (m, 3H), 7.24 – 7.16 (m, 5H), 7.15 – 7.03 (m, 4H), 6.90 (d,  $J = 7.2$  Hz, 1H), 6.67 (d,  $J = 8.4$  Hz, 2H), 5.79 (s, 1H), 4.37 – 4.26 (m, 1H), 4.06 (s, 1H), 3.58 – 3.49 (m, 1H), 2.84 – 2.73 (m, 1H), 2.39 (s, 3H), 2.34 – 2.27 (m, 1H), 1.81 (s,

3H).  $^{13}\text{C}$  NMR (101 MHz,  $\text{CDCl}_3$ )  $\delta$  194.1, 170.3, 145.1, 139.7, 137.9, 136.3, 136.2, 133.8, 133.6, 129.9, 129.2, 129.1, 128.5, 127.9, 127.7, 126.8, 125.7, 124.8, 115.5, 96.6, 86.5, 54.3, 37.9, 34.0, 29.6, 21.7; **HRMS** (ESI):  $m/z$   $[\text{M} + \text{Na}]^+$  calcd for  $[\text{C}_{34}\text{H}_{29}\text{ClNaO}_5\text{S}]^+$ : 607.1316, found: 607.1326; **HPLC**: Daicel Chiralpak IC, *n*-hexane/*i*-PrOH = 70/30, flow rate = 1 mL/min,  $\lambda$  = 254 nm,  $t_{\text{major}}$  = 18.78 min and  $t_{\text{minor}}$  = 14.75 min.

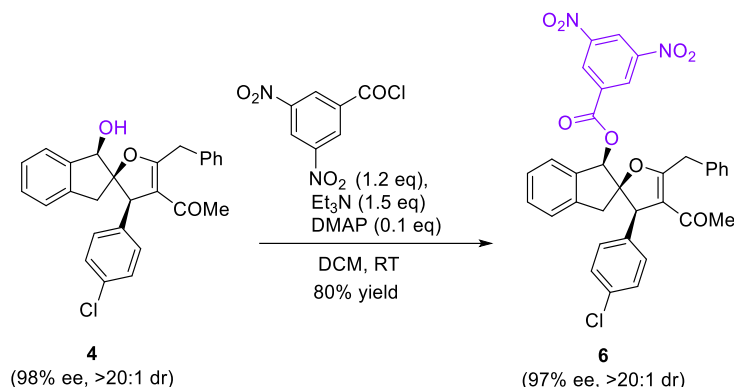

The mixture of **4** (43.1 mg, 0.1 mmol, 1.0 eq),  $\text{Et}_3\text{N}$  (15.2 mg, 0.15 mmol, 1.2 eq), and DMAP (1.2 mg, 0.12 mmol, 0.1 eq) in DCM (2 mL) was treated with 3,5-dinitrobenzoyl chloride (27.6 mg, 0.12 mmol, 1.2 eq) at 0 °C. The reaction was allowed to stir at room temperature for 24 h. Upon completion as shown by TLC, the reaction mixture was washed with saturated  $\text{NH}_4\text{Cl}$  (1 mL) and extracted using dichloromethane (3 x 1 mL). The organic layer was dried over  $\text{Na}_2\text{SO}_4$  and concentrated in vacuo. The residue was purified by flash chromatography with petroleum ether/ethyl acetate (3/1) to provide the product **6** as a white solid.

**(1'R,2R,3R)-4-acetyl-5-benzyl-3-(4-chlorophenyl)-1',3'-dihydro-3H-spiro[furan-2,2'-inden]-1'-yl 3,5-dinitrobenzoate (6):**

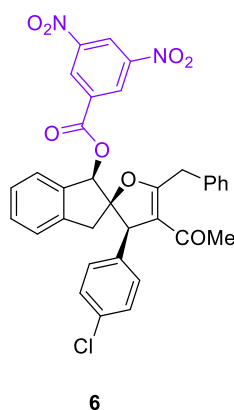

White solid in 80% isolated yield (51.8 mg, >20:1 dr); **m.p.** = 188.1-189.1 °C;  $[\alpha]_{\text{D}}^{20}$  = -190.8 ( $c$  = 2.3, DCM, 97% ee);  $^1\text{H}$  NMR (400 MHz,  $\text{CDCl}_3$ )  $\delta$  9.19 – 9.13 (m, 1H), 8.88 – 8.77 (m, 2H), 7.54 (d,  $J$  = 6.9 Hz, 1H), 7.48 – 7.21 (m, 5H), 7.19 (d,  $J$  = 7.3 Hz, 2H), 7.06 (d,  $J$  = 7.2 Hz, 1H), 6.96 – 6.91 (m, 2H), 6.79 – 6.74 (m, 1H), 6.27 (s, 1H), 4.47 – 4.32 (m, 1H), 4.13 (s, 1H), 3.96 – 3.84 (m, 1H), 3.35 – 3.22 (m, 1H), 2.53 – 2.41 (m, 1H), 1.95 (s, 3H);  $^{13}\text{C}$  NMR (101 MHz,  $\text{CDCl}_3$ )  $\delta$  194.5, 169.9, 161.9, 148.4, 141.4, 136.8, 136.3, 136.2, 133.9, 133.3, 130.6, 129.4, 128.8, 128.2, 127.9, 127.2, 126.3, 125.1, 122.3, 115.9, 95.2, 81.1, 55.0, 37.0, 34.1, 29.6; **HRMS** (ESI):  $m/z$   $[\text{M} + \text{Na}]^+$  calcd for  $[\text{C}_{34}\text{H}_{25}\text{ClN}_2\text{NaO}_8]^+$ : 647.1192, found: 647.1199; **HPLC**: Daicel Chiralpak IC, *n*-hexane/*i*-PrOH = 70/30, flow rate = 1 mL/min,  $\lambda$  = 254 nm,  $t_{\text{major}}$  = 52.94 min and  $t_{\text{minor}}$  = 47.56 min.

## References

1. Matsuo, K.; Shindo, M. Cu(II)-Catalyzed Acylation by Thiol Esters Under Neutral Conditions: Tandem Acylation-Wittig Reaction Leading to a One-Pot Synthesis of Butenolides. *Org. Lett.*, **2010**, *12*, 5346–5349.
2. Poulsen, P. H.; Li, Y.; Lauridsen, V. H.; Jørgensen, D. K. B.; Palazzo, T. A.; Meazza, M.; Jørgensen, K. A. Organocatalytic Formation of Chiral Trisubstituted Allenes and Chiral Furan Derivatives. *Angew. Chem. Int. Ed.*, **2018**, *57*, 10661–10665.
3. Guo, H. Y., Zhang, S., Yu, X. Q., Feng, X. J., Yamamoto, Y., Bao, M. [3 + 2] Cycloaddition of  $\alpha$ -Aryl- $\alpha$ -diazoacetates with Terminal Alkynes via the Cooperative Catalysis of Palladium and Acid. *ACS Catalysis*, **2021**, *11*, 10789-10795.

## NMR Spectra of compounds

$^1\text{H}$  NMR (400 MHz,  $\text{CDCl}_3$ )

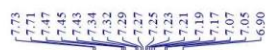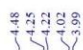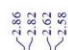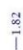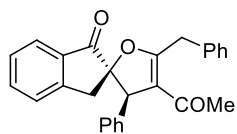

3a

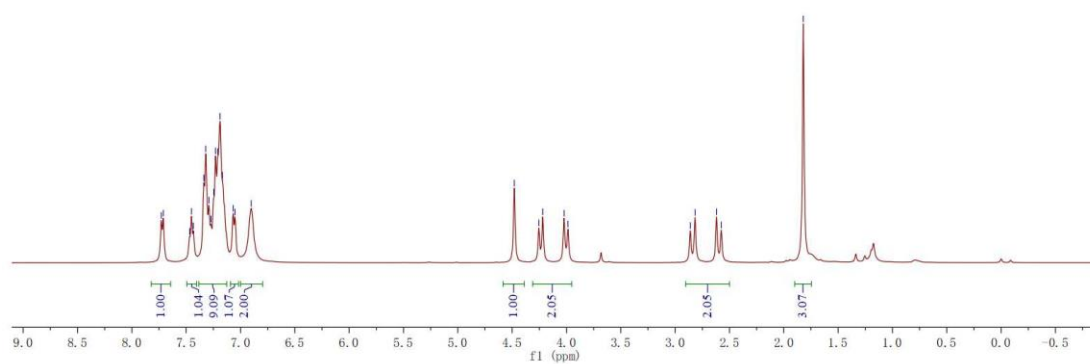

$^{13}\text{C}$  NMR (101 MHz,  $\text{CDCl}_3$ )

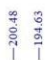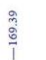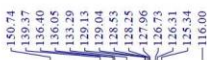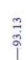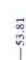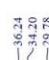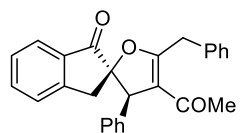

3a

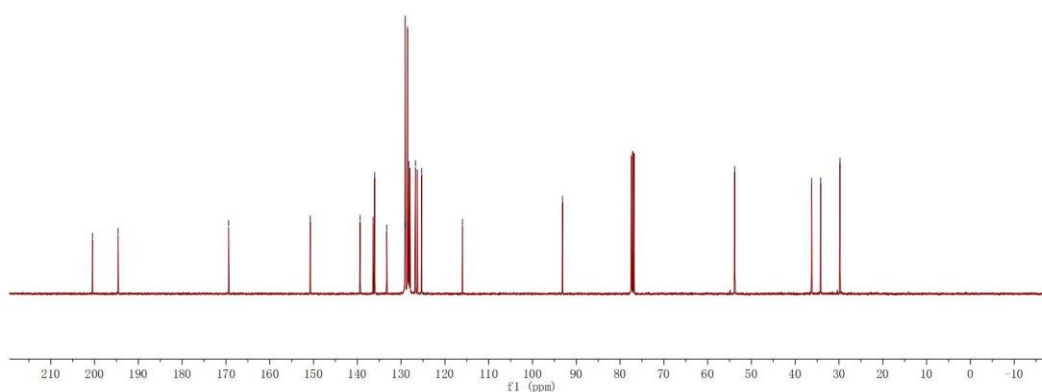

**$^1\text{H}$  NMR (400 MHz,  $\text{CDCl}_3$ )**

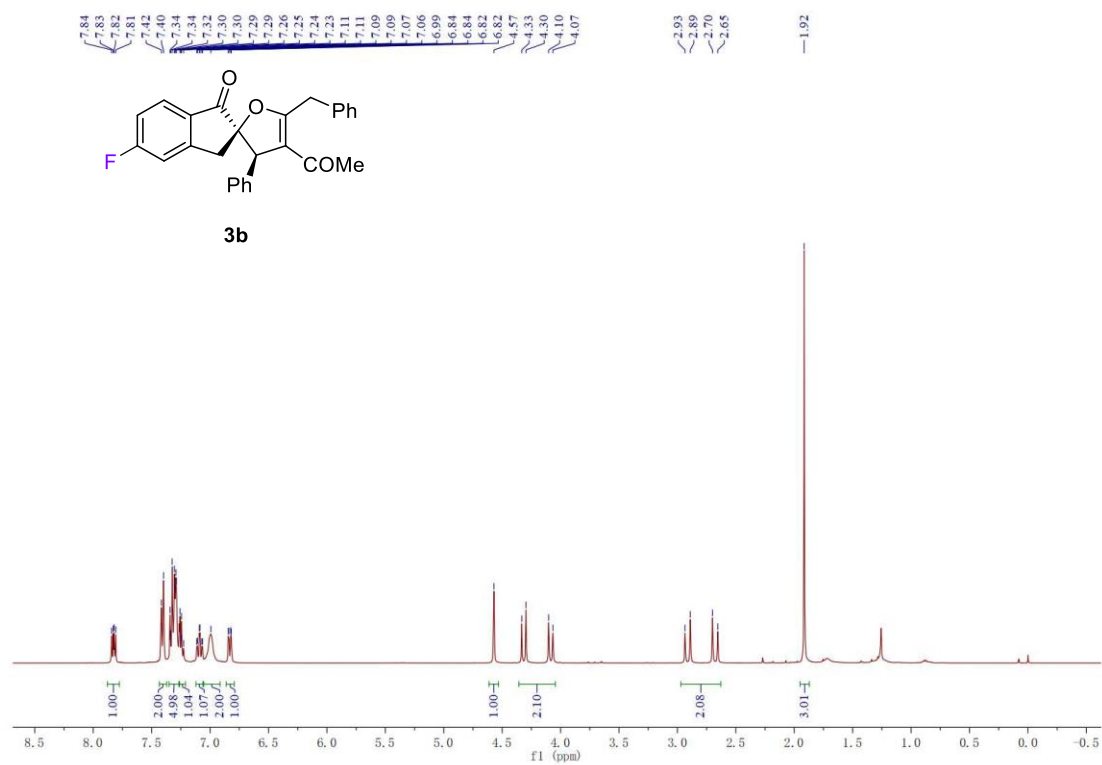

**$^{13}\text{C}$  NMR (101 MHz,  $\text{CDCl}_3$ )**

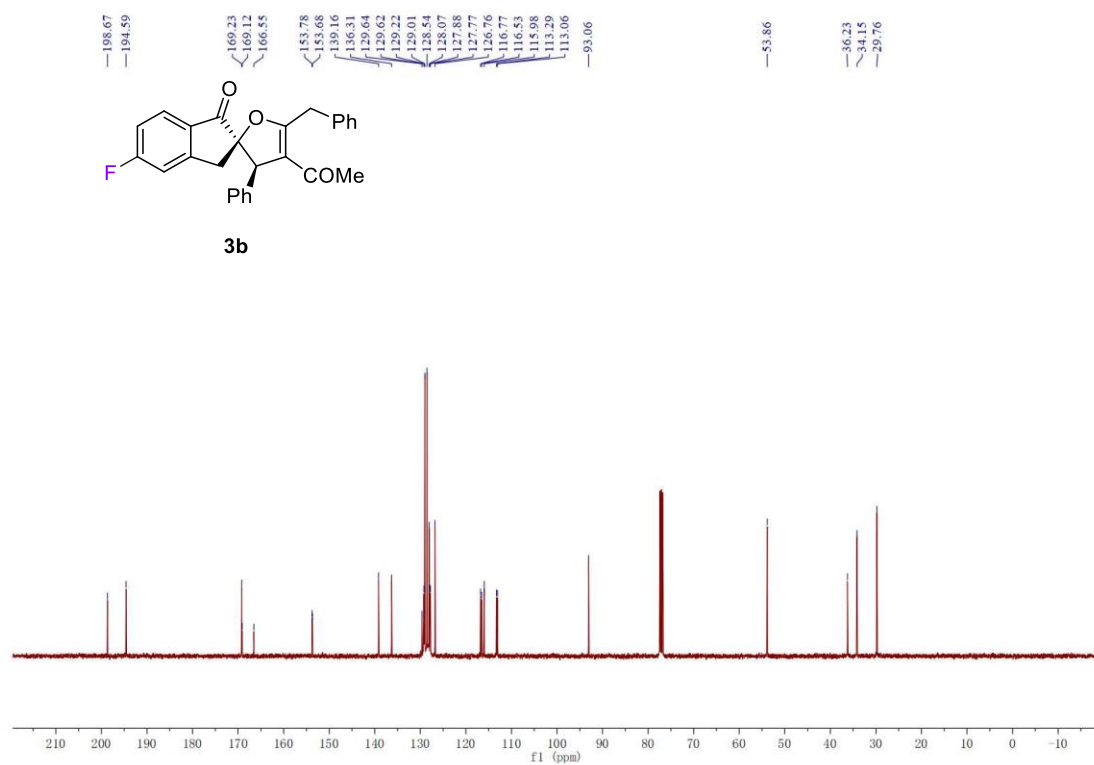

**<sup>19</sup>F NMR (376 MHz, CDCl<sub>3</sub>)**

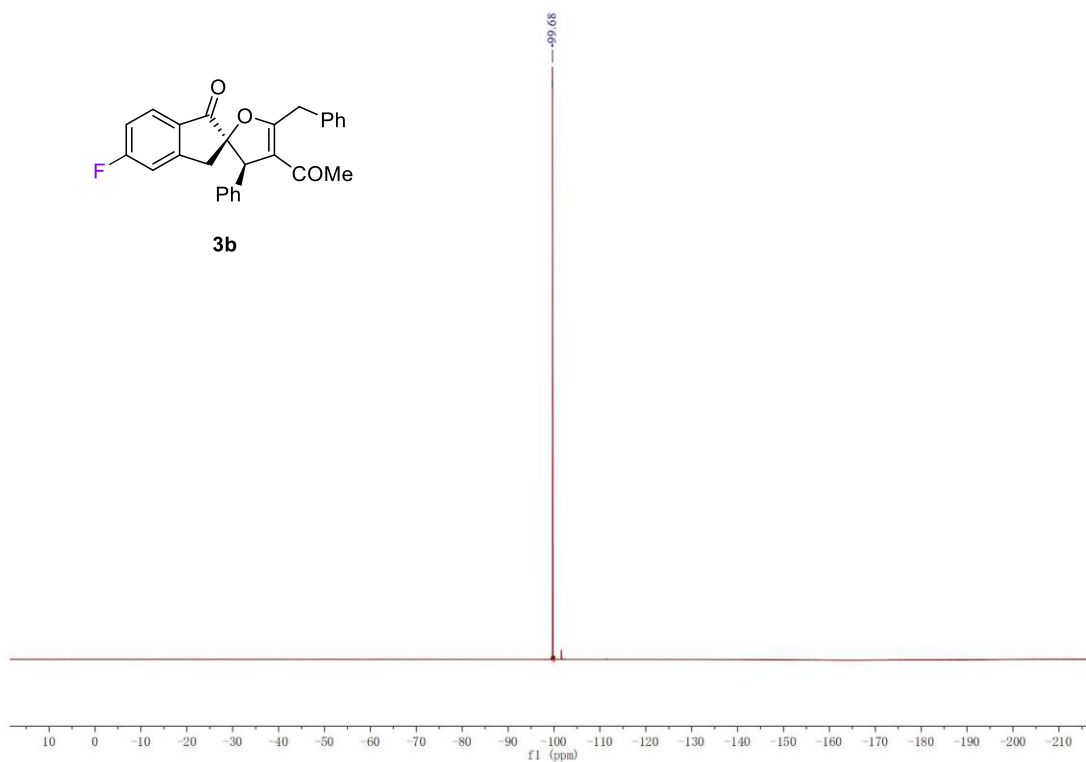

**<sup>1</sup>H NMR (400 MHz, CDCl<sub>3</sub>)**

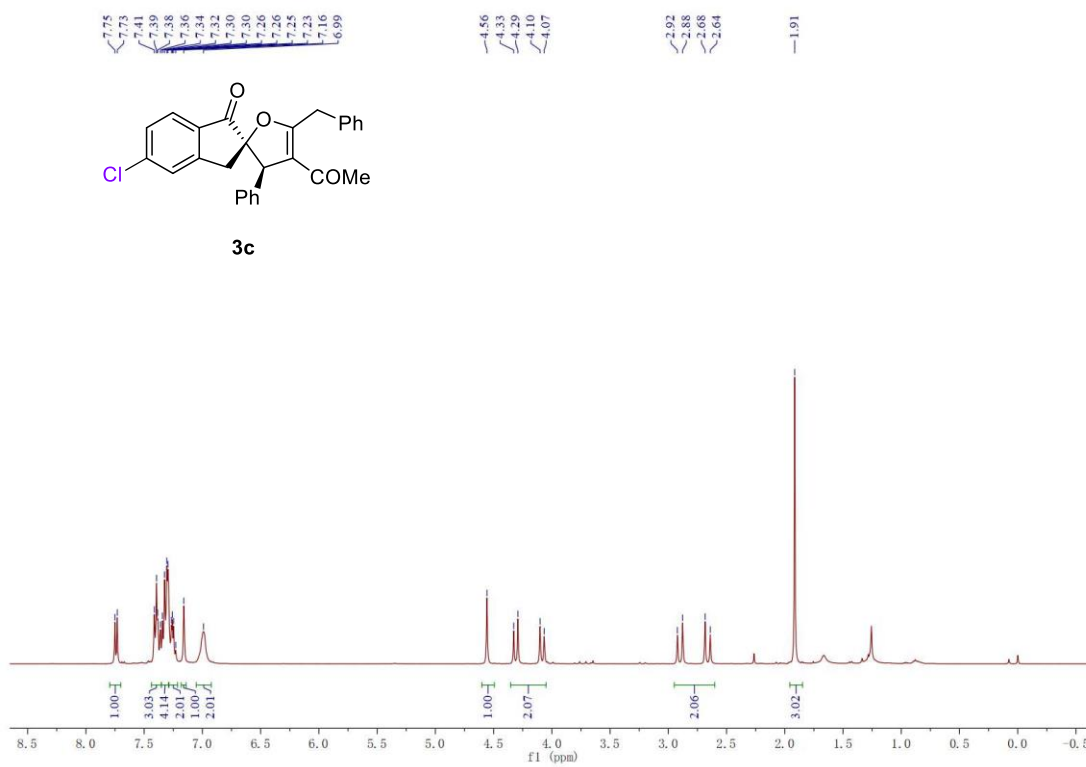



$^{13}\text{C}$  NMR (101 MHz,  $\text{CDCl}_3$ )

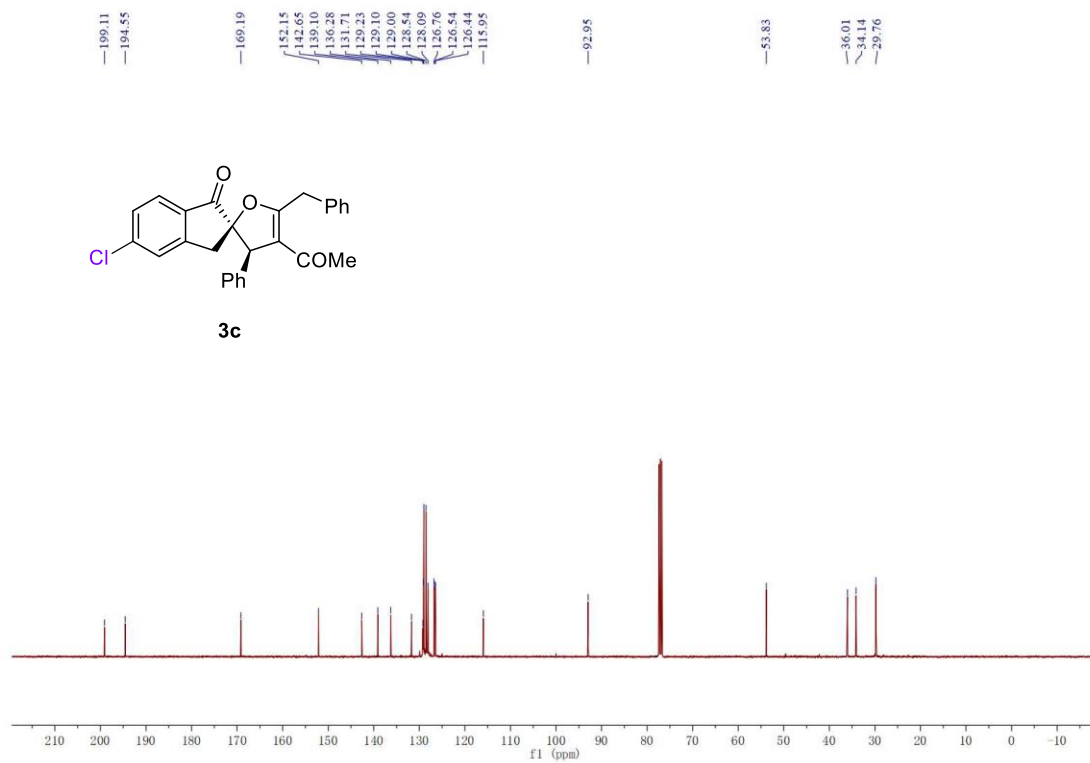

$^1\text{H}$  NMR (400 MHz,  $\text{CDCl}_3$ )

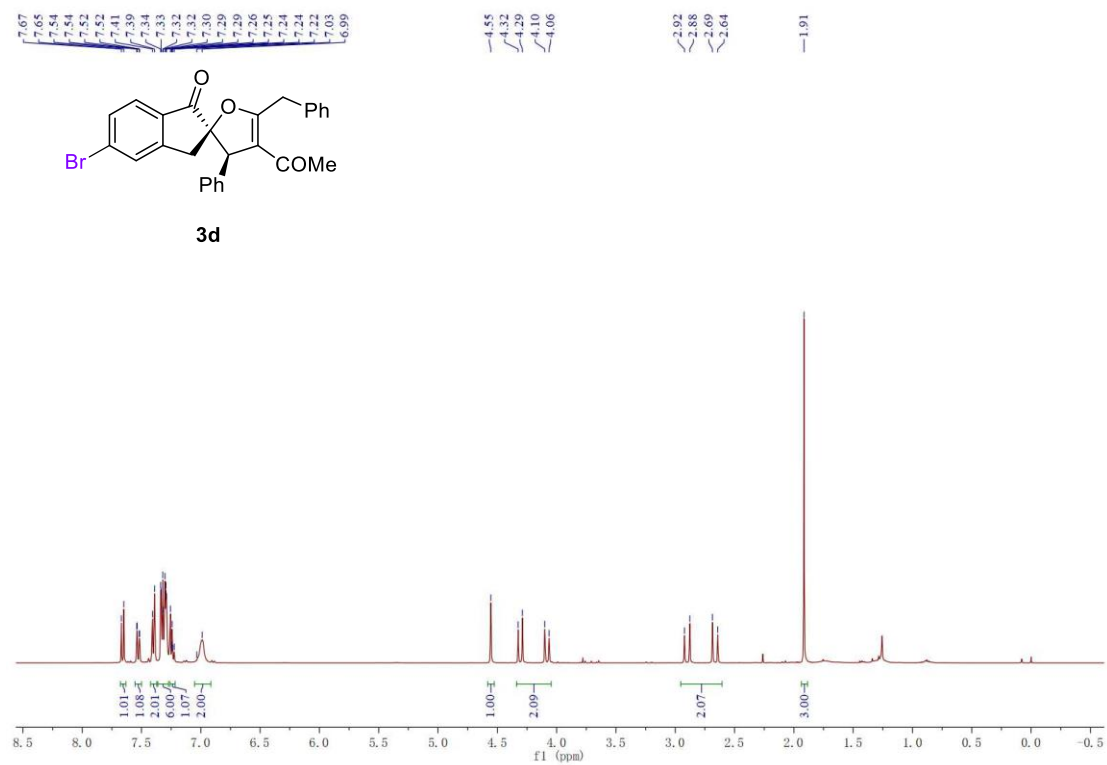

$^{13}\text{C}$  NMR (101 MHz,  $\text{CDCl}_3$ )

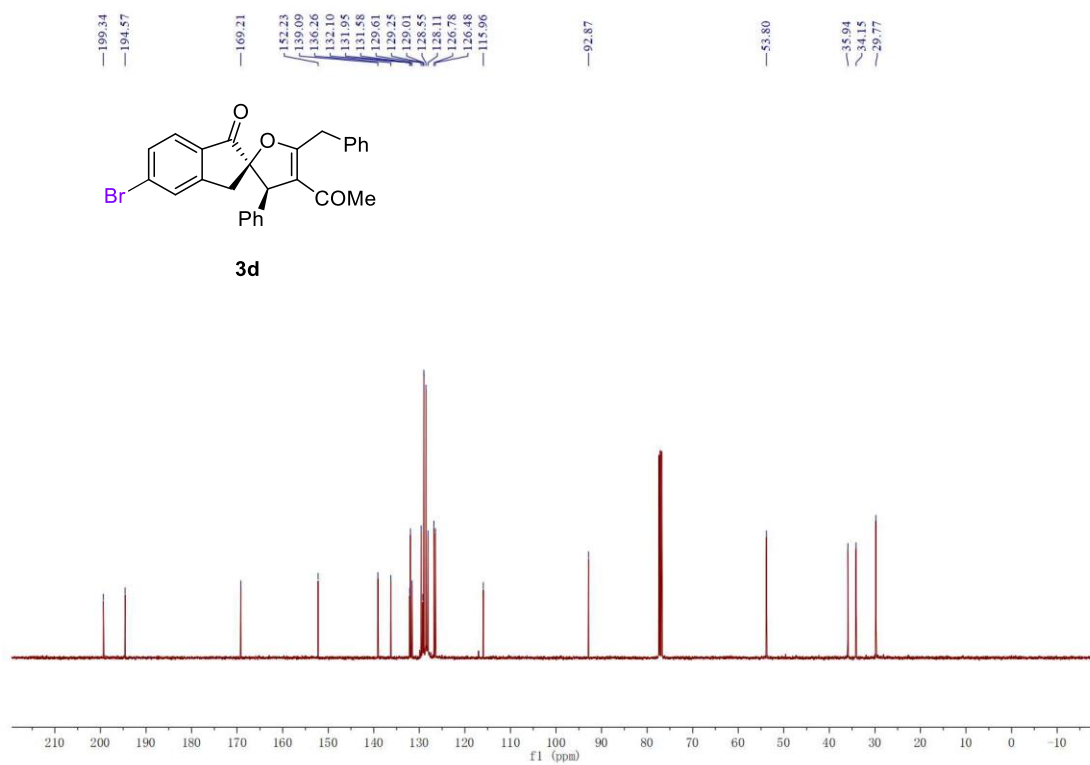

$^1\text{H}$  NMR (400 MHz,  $\text{CDCl}_3$ )

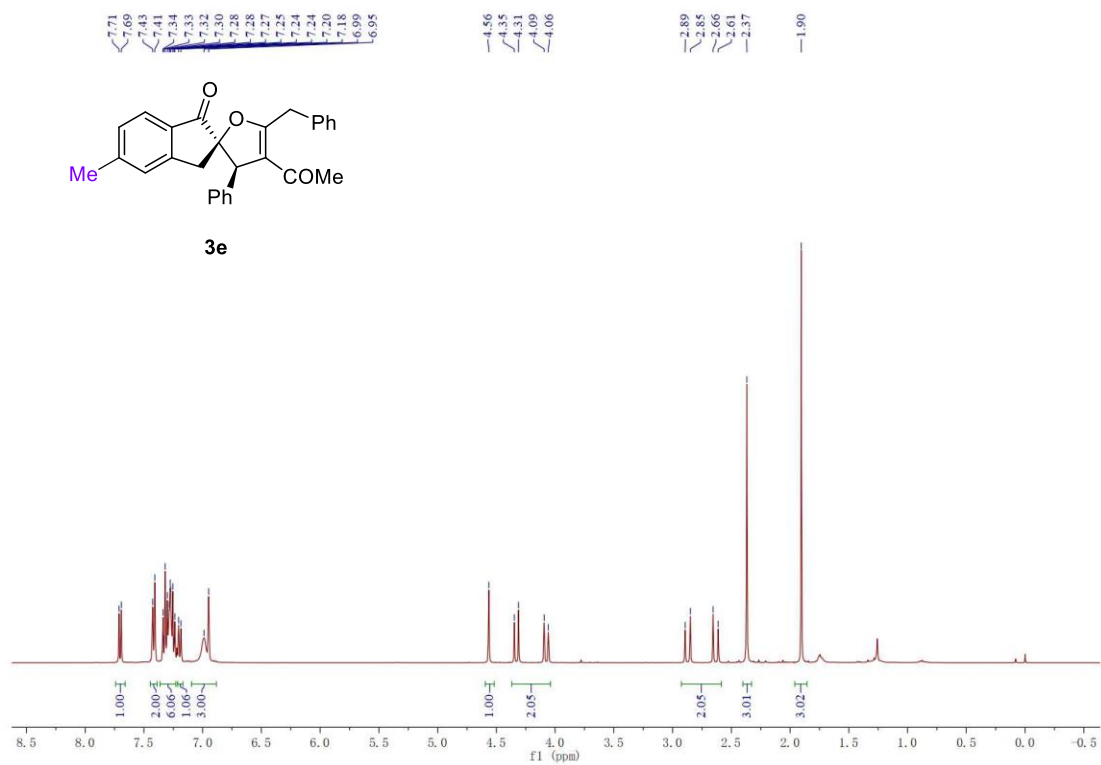

$^{13}\text{C}$  NMR (101 MHz,  $\text{CDCl}_3$ )

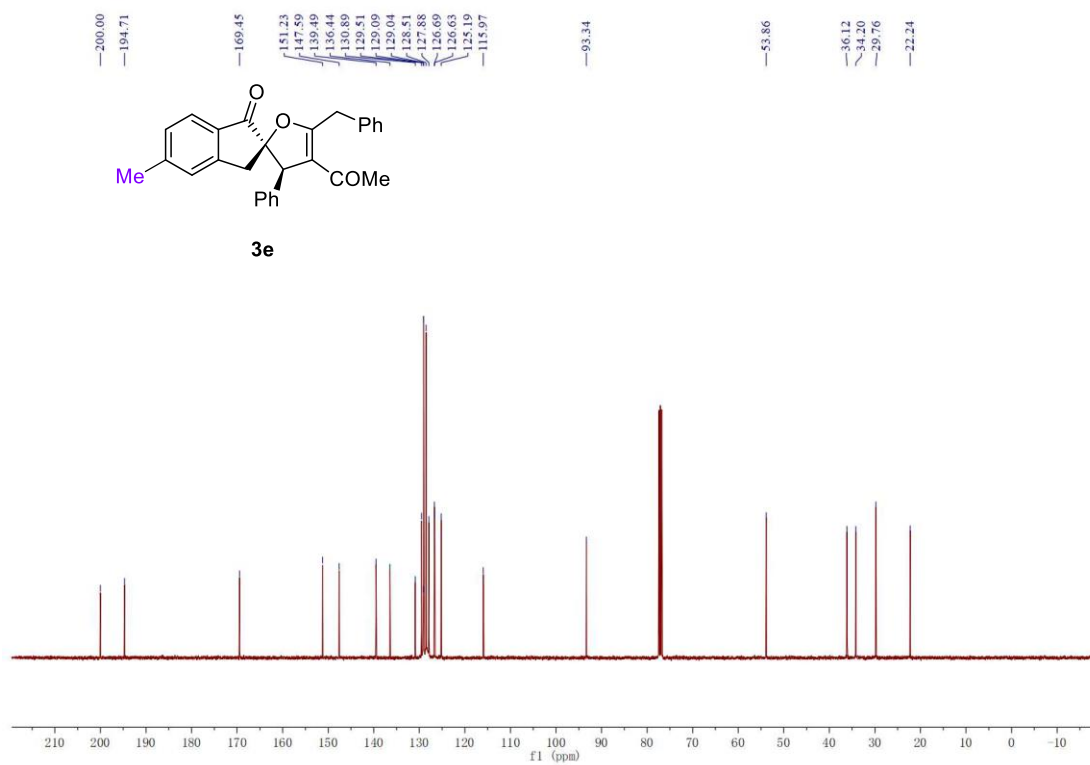

$^1\text{H}$  NMR (400 MHz,  $\text{CDCl}_3$ )

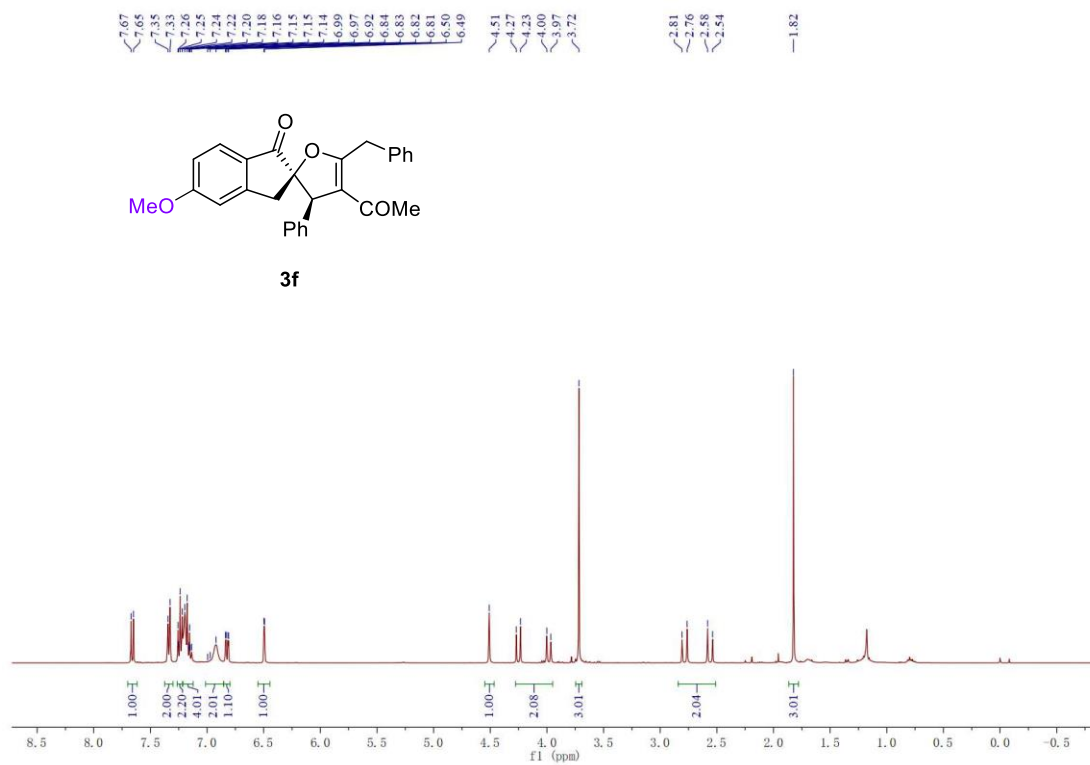

<sup>13</sup>C NMR (101 MHz, CDCl<sub>3</sub>)

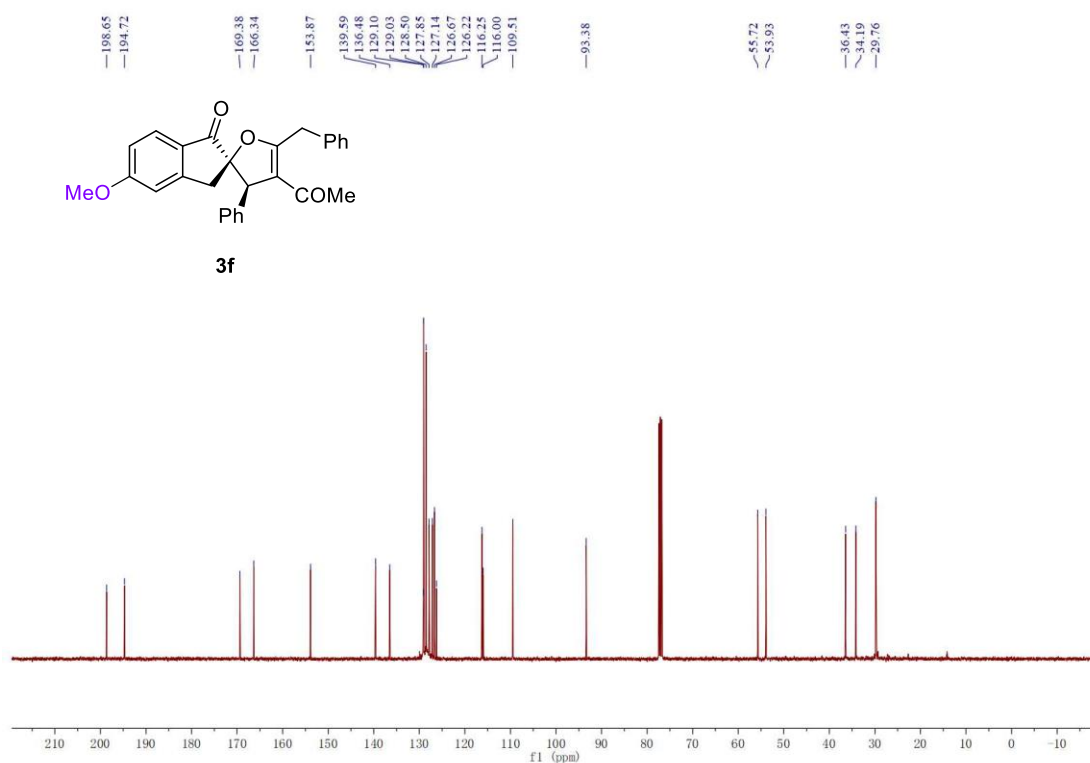

<sup>1</sup>H NMR (400 MHz, CDCl<sub>3</sub>)

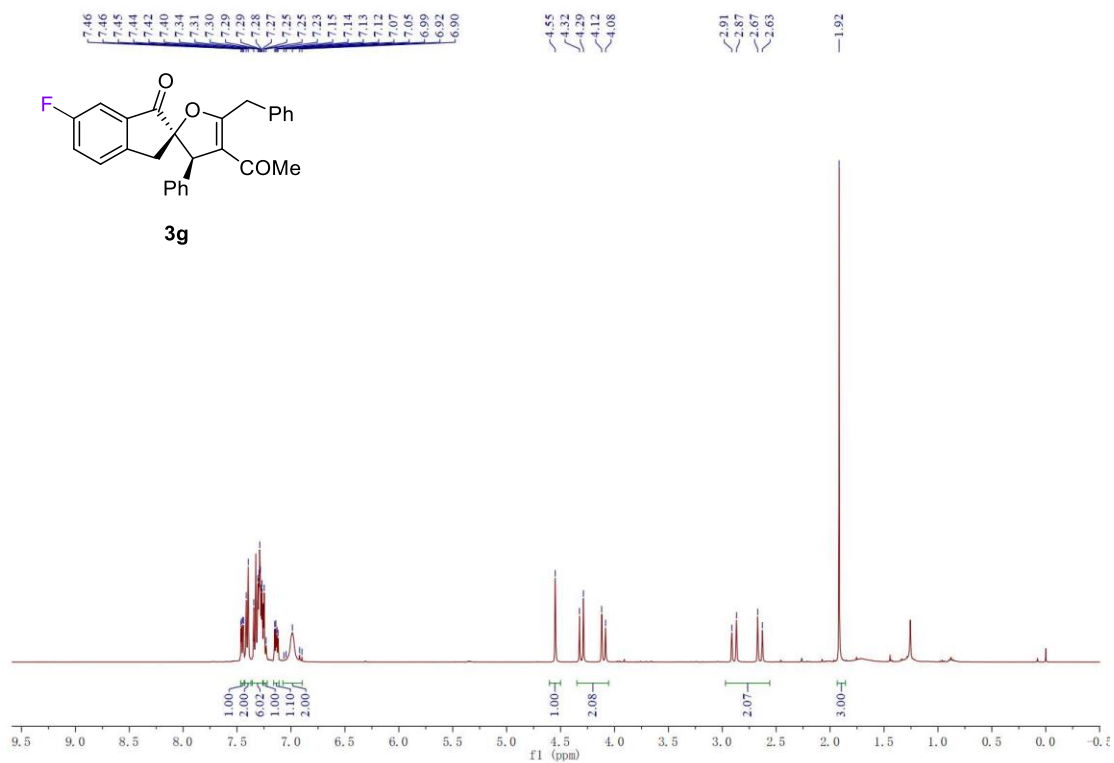

<sup>13</sup>C NMR (101 MHz, CDCl<sub>3</sub>)

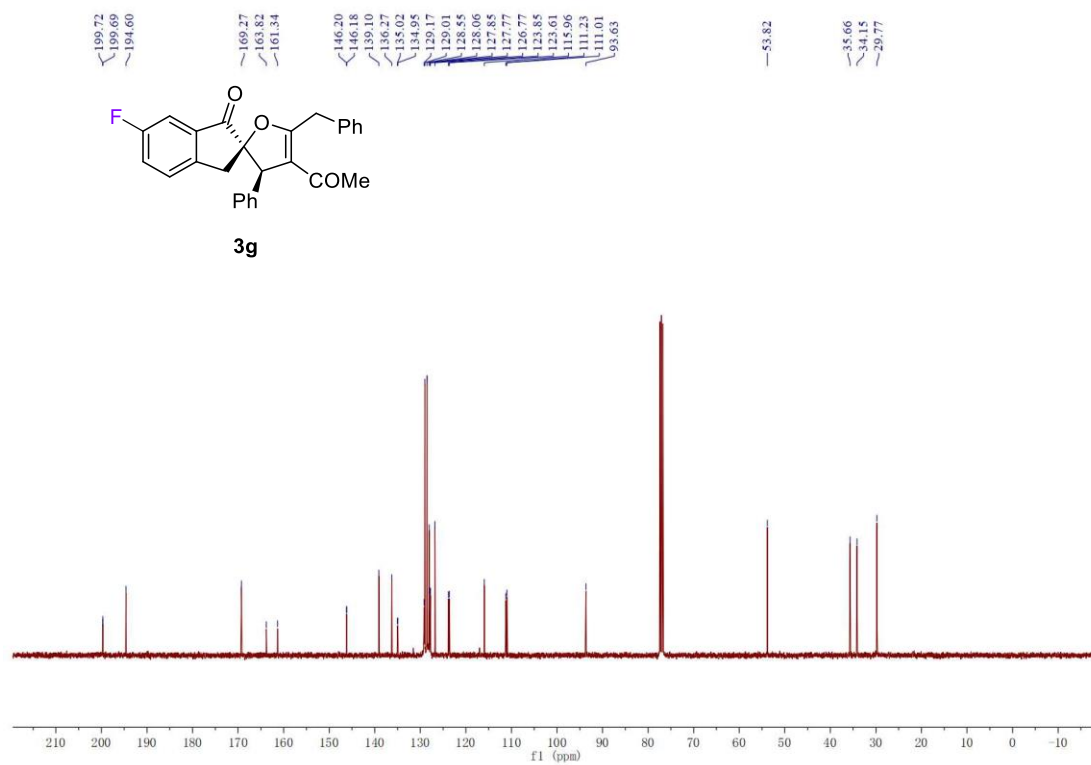

<sup>19</sup>F NMR (376 MHz, CDCl<sub>3</sub>)

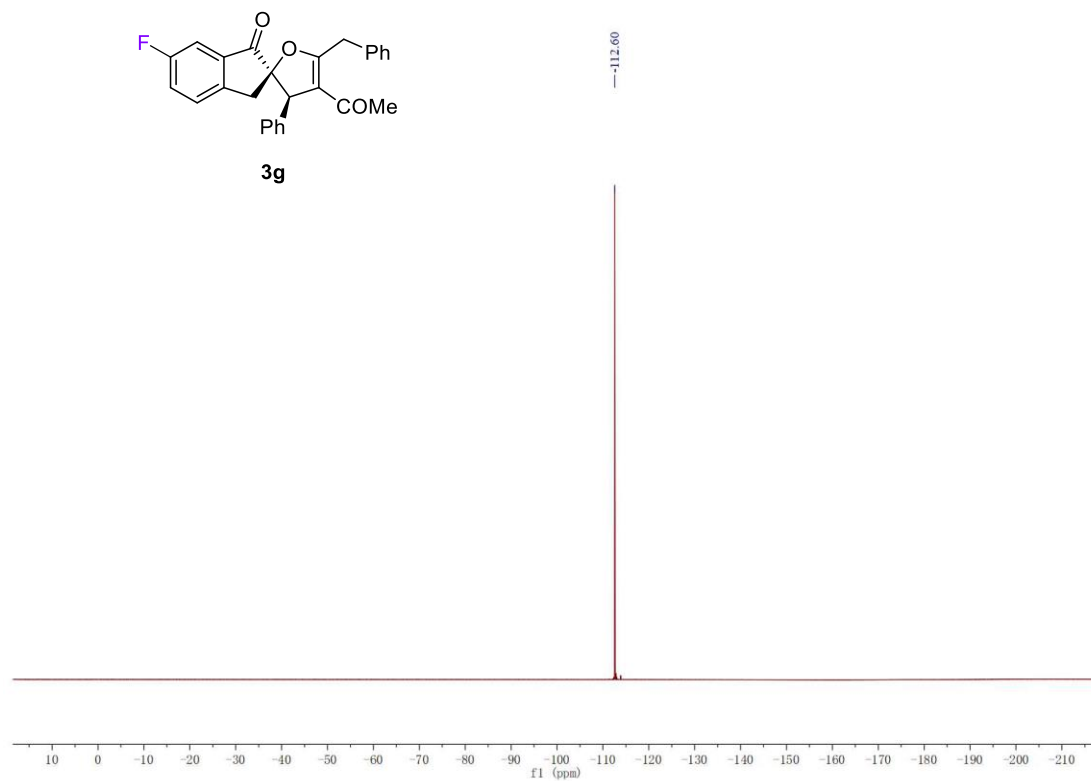

**<sup>1</sup>H NMR (400 MHz, CDCl<sub>3</sub>)**

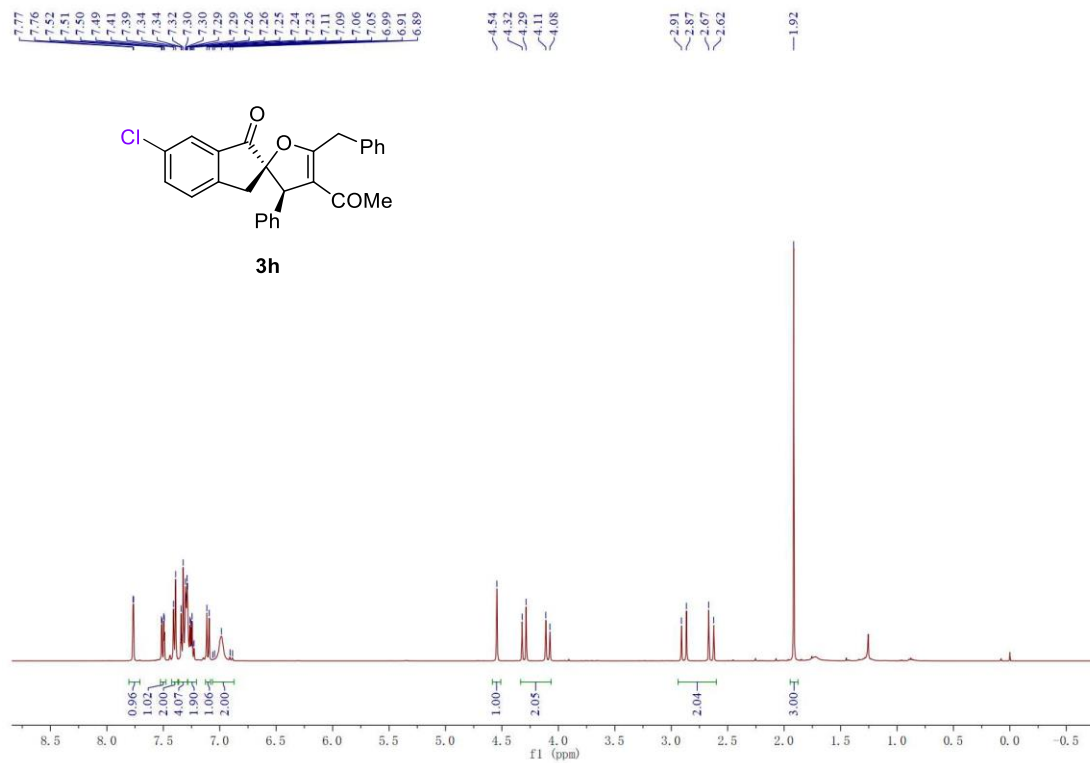

**<sup>13</sup>C NMR (101 MHz, CDCl<sub>3</sub>)**

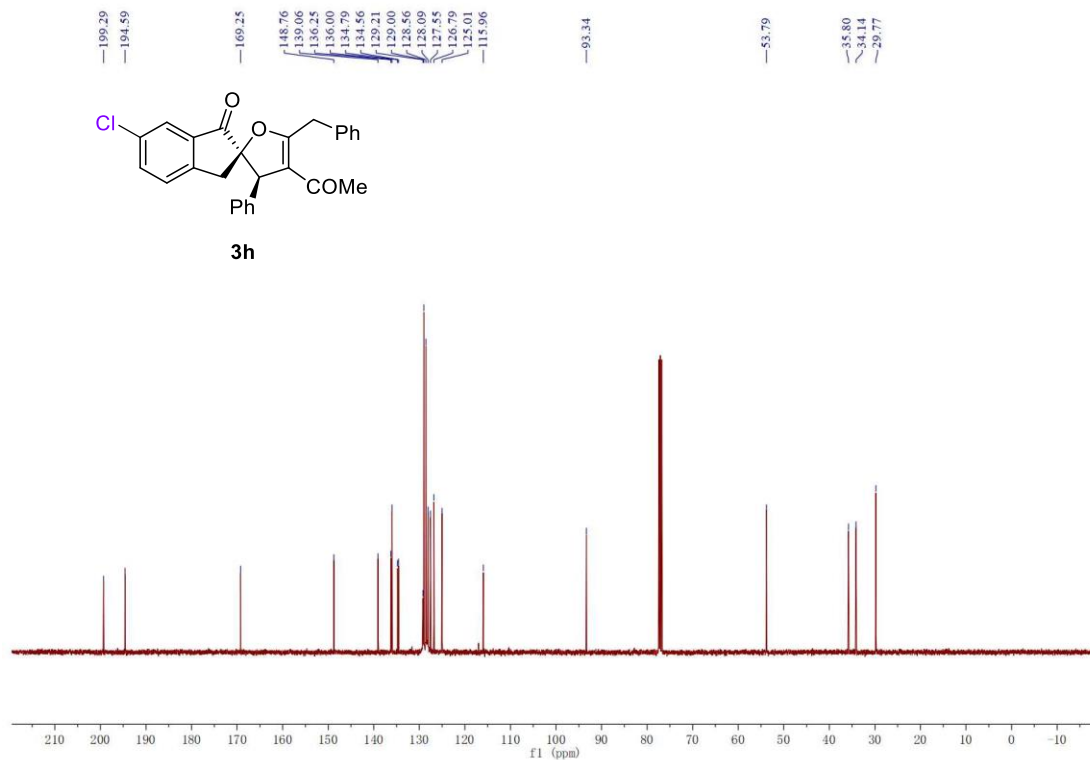

**<sup>1</sup>H NMR (400 MHz, CDCl<sub>3</sub>)**

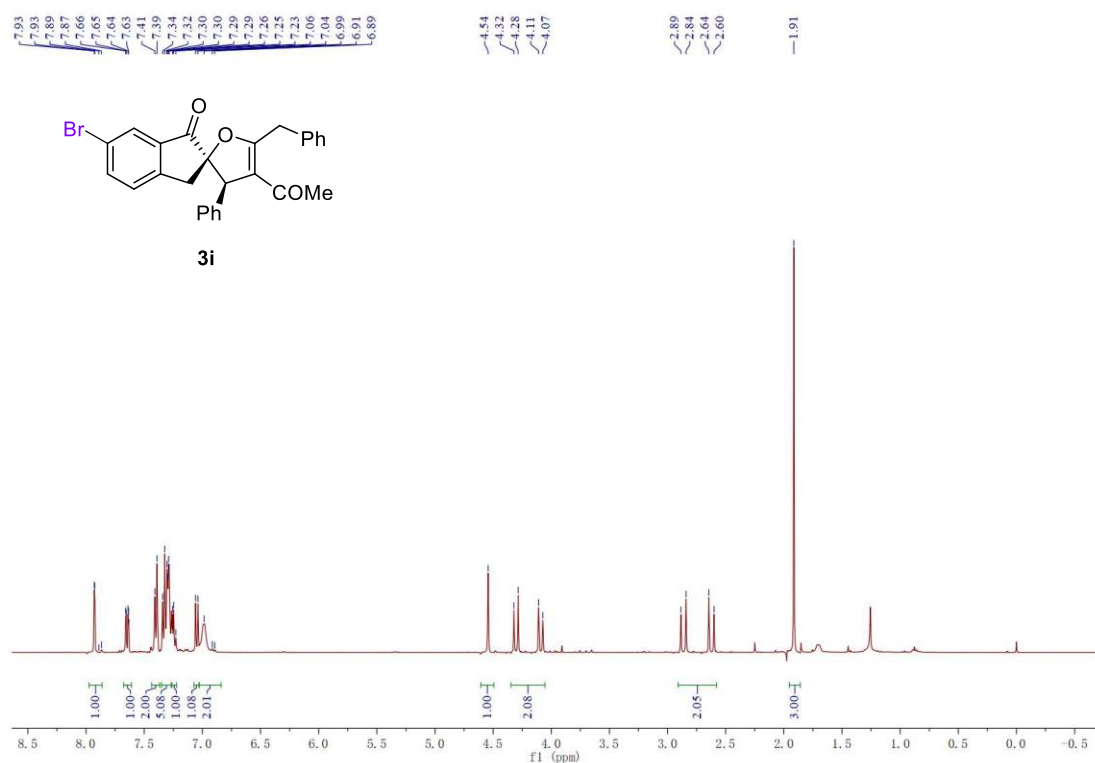

**<sup>13</sup>C NMR (101 MHz, CDCl<sub>3</sub>)**

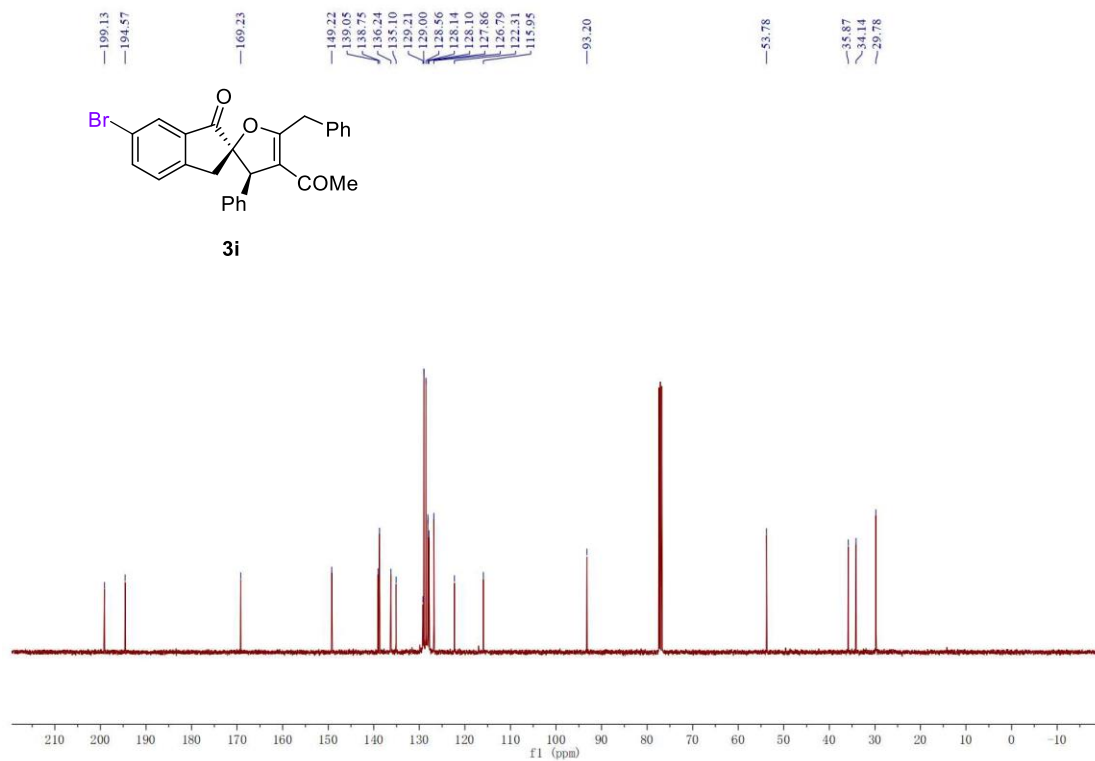

**<sup>1</sup>H NMR (400 MHz, CDCl<sub>3</sub>)**

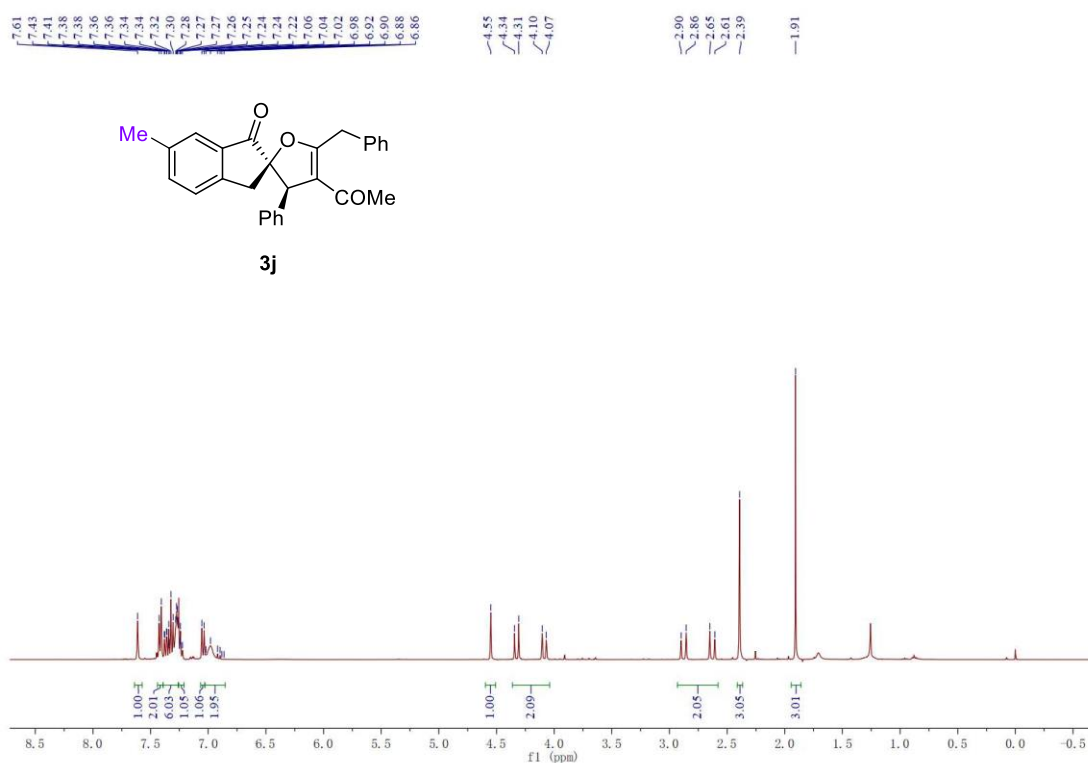

**<sup>13</sup>C NMR (101 MHz, CDCl<sub>3</sub>)**

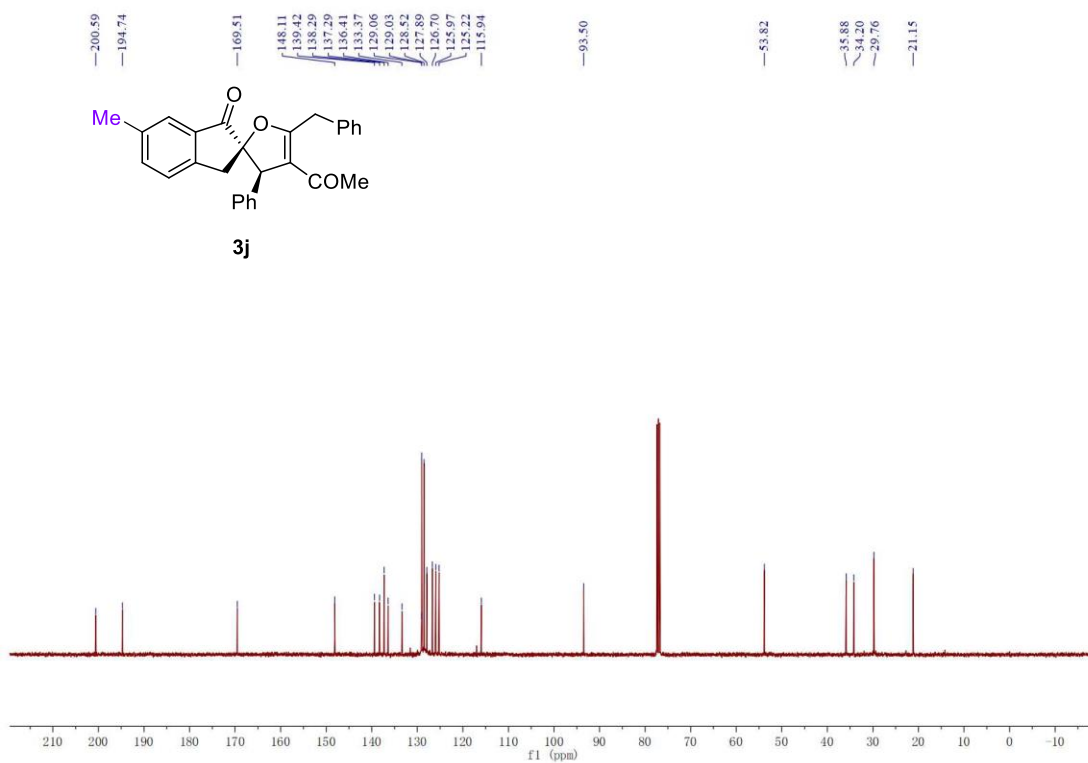



$^1\text{H}$  NMR (400 MHz,  $\text{CDCl}_3$ )

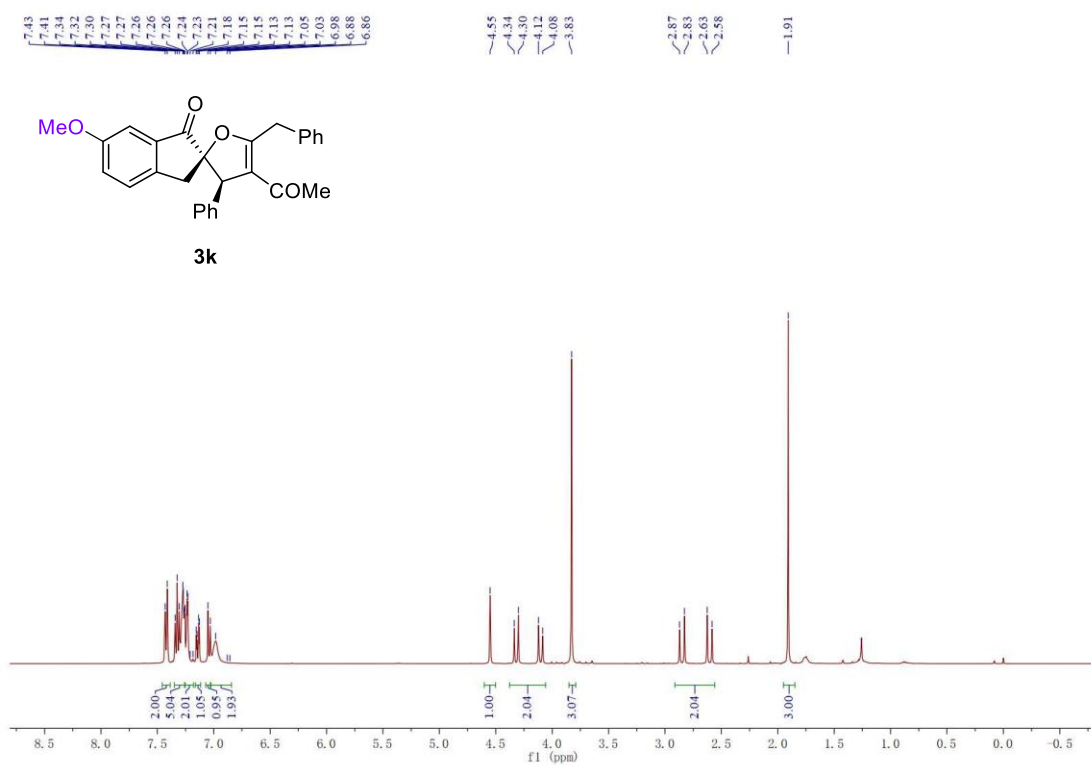

$^{13}\text{C}$  NMR (101 MHz,  $\text{CDCl}_3$ )

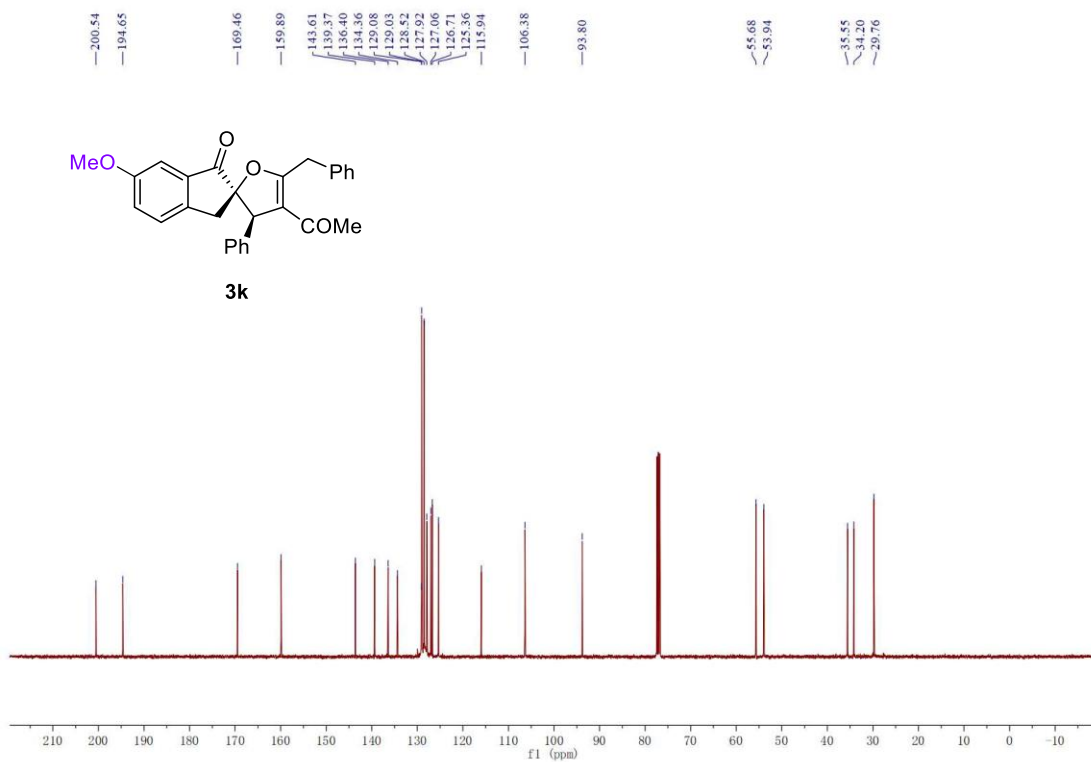

**<sup>1</sup>H NMR (400 MHz, CDCl<sub>3</sub>)**

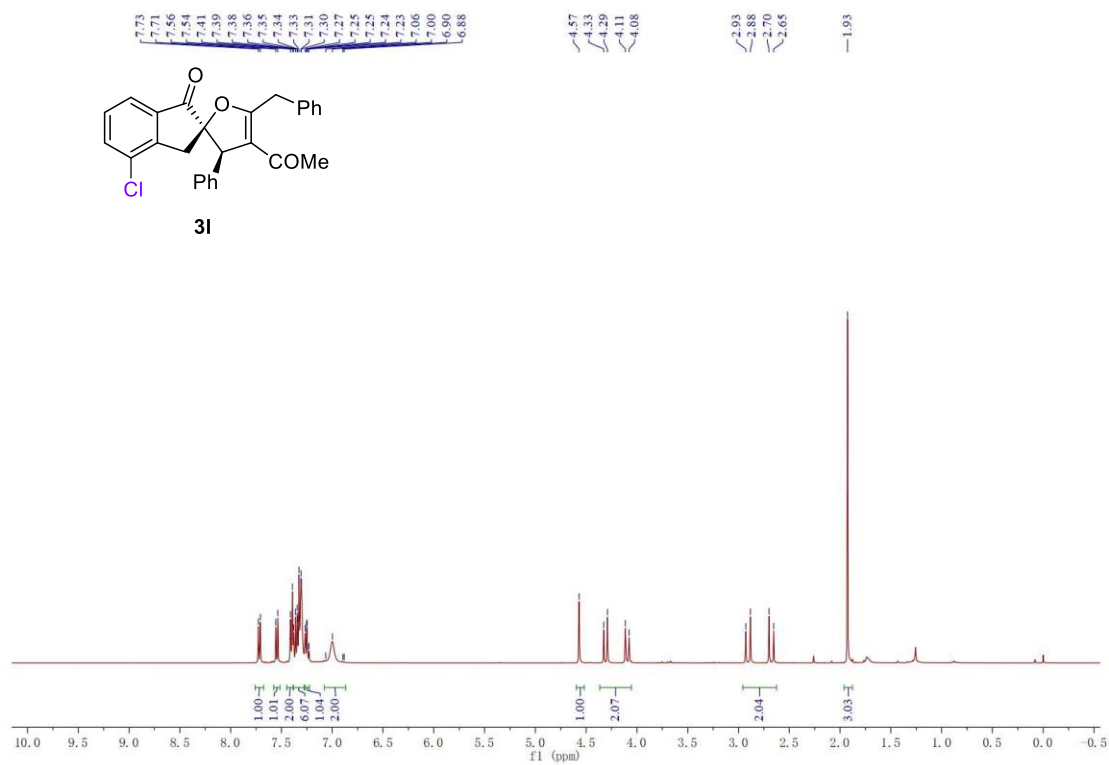

**<sup>13</sup>C NMR (101 MHz, CDCl<sub>3</sub>)**

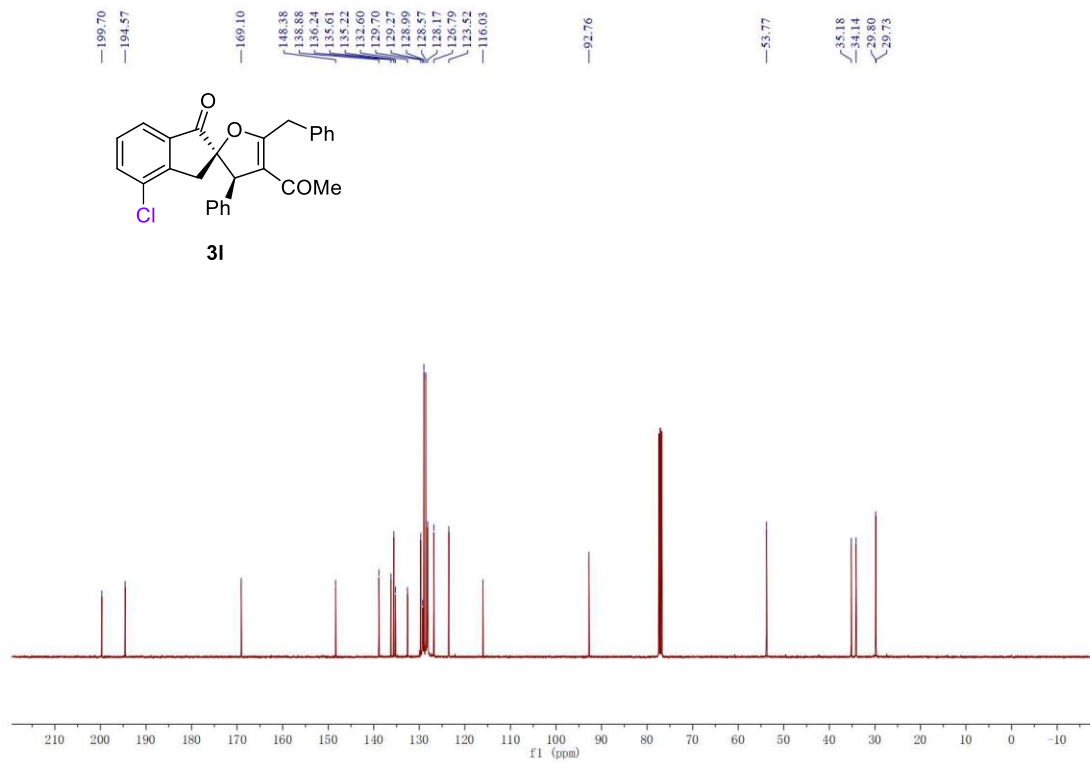

**<sup>1</sup>H NMR (400 MHz, CDCl<sub>3</sub>)**

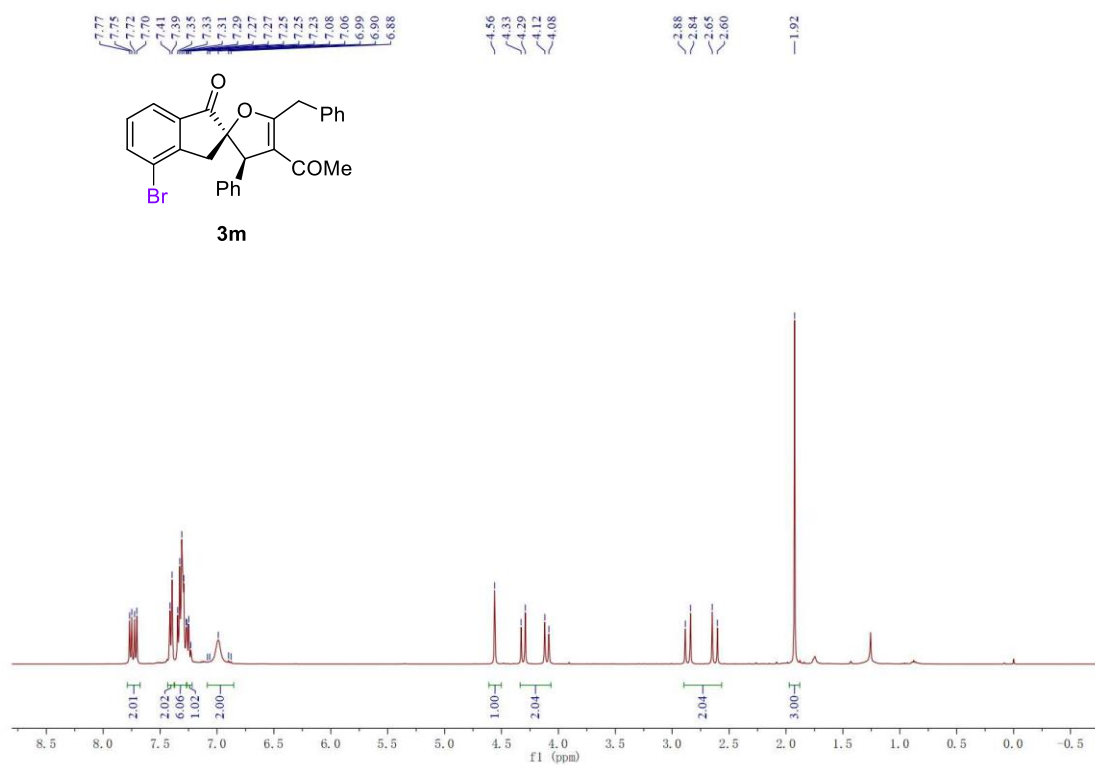

**<sup>13</sup>C NMR (101 MHz, CDCl<sub>3</sub>)**

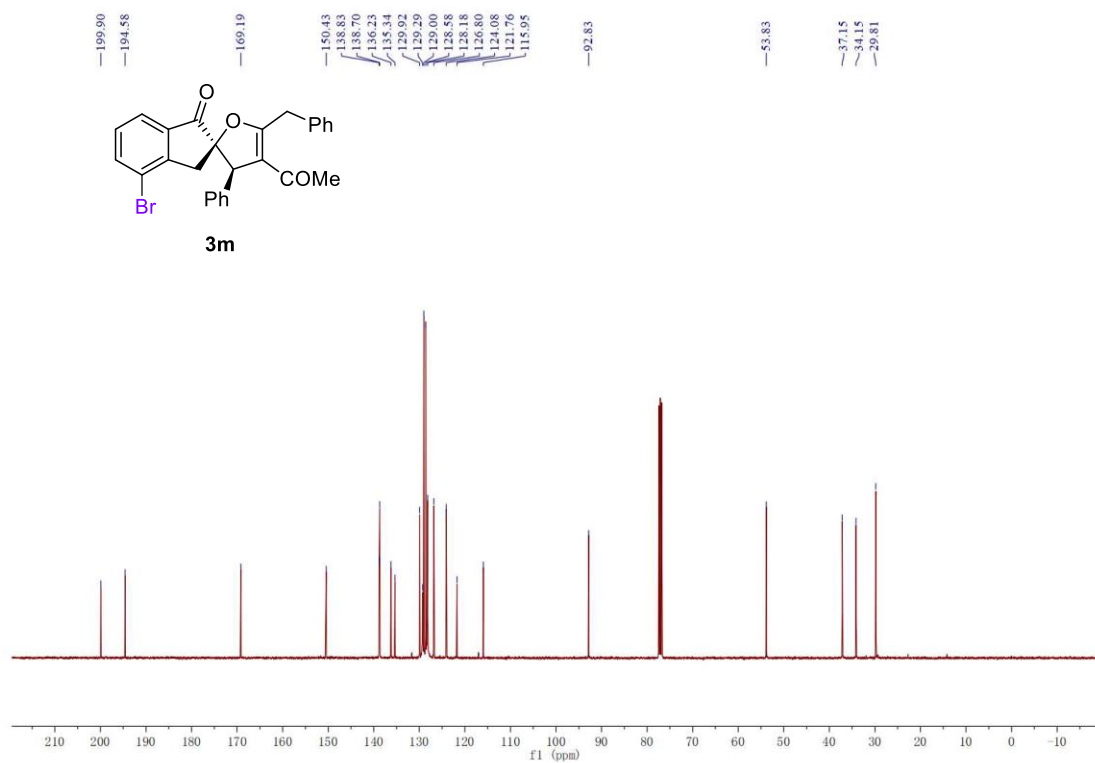

**<sup>1</sup>H NMR (400 MHz, CDCl<sub>3</sub>)**

7.67  
7.65  
7.44  
7.42  
7.37  
7.35  
7.33  
7.31  
7.29  
7.28  
7.27  
7.26  
7.24  
7.23  
7.08  
7.06  
7.02  
7.00  
6.96  
6.88

4.55  
4.36  
4.33  
4.11  
4.07

2.81  
2.77  
2.57  
2.52

2.00  
1.91

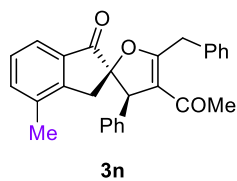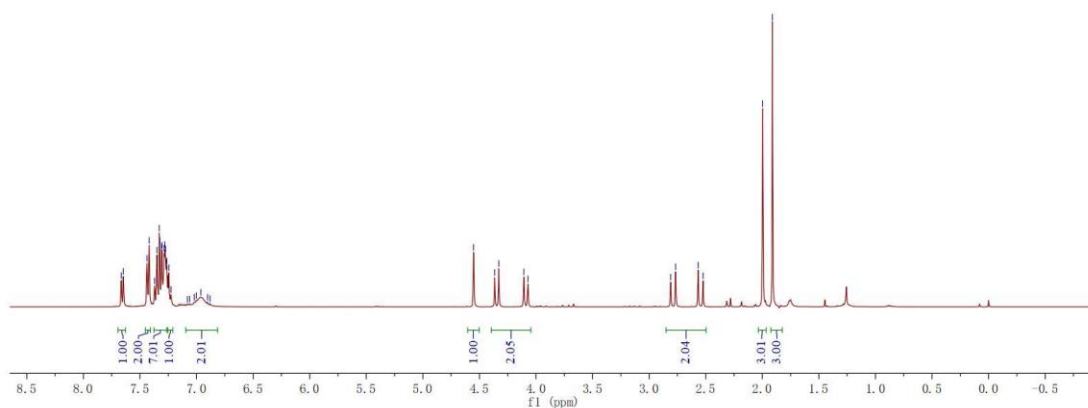

**<sup>13</sup>C NMR (101 MHz, CDCl<sub>3</sub>)**

200.86  
194.73  
169.61  
149.56  
139.77  
136.46  
136.42  
135.61  
133.07  
129.10  
129.05  
128.53  
128.34  
127.95  
126.72  
122.68  
115.72  
93.26  
54.01  
34.84  
34.23  
29.78  
17.62

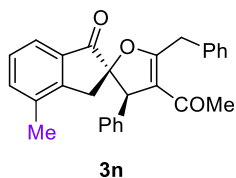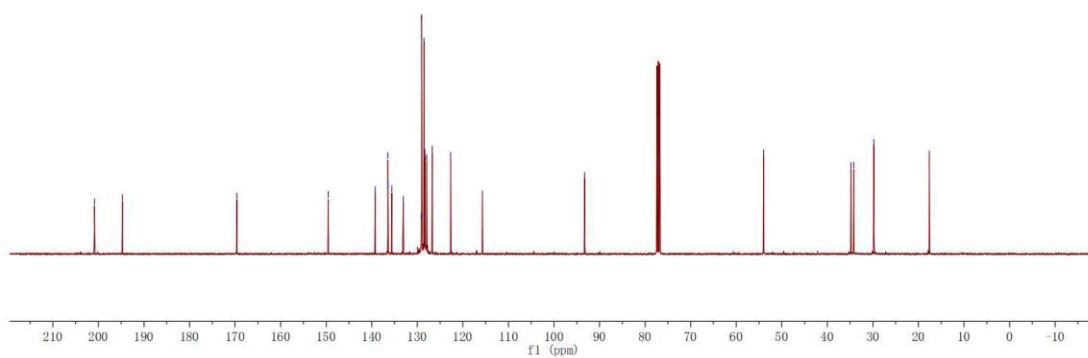

**<sup>1</sup>H NMR (400 MHz, CDCl<sub>3</sub>)**

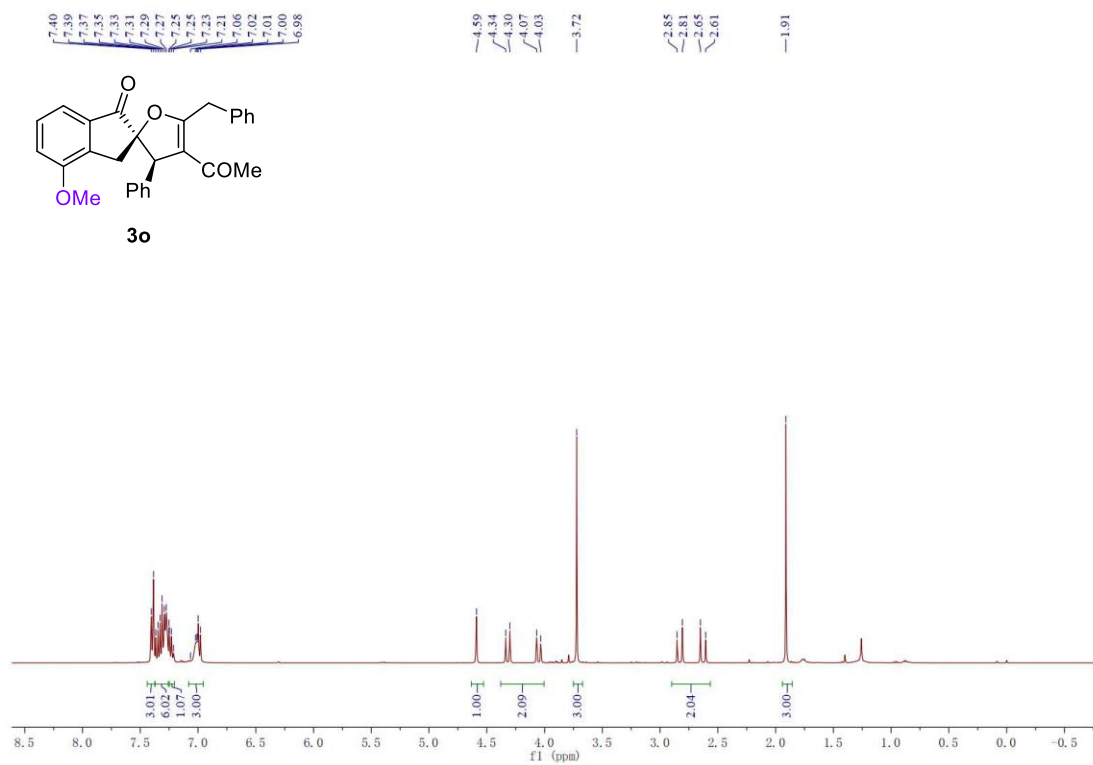

**<sup>13</sup>C NMR (101 MHz, CDCl<sub>3</sub>)**

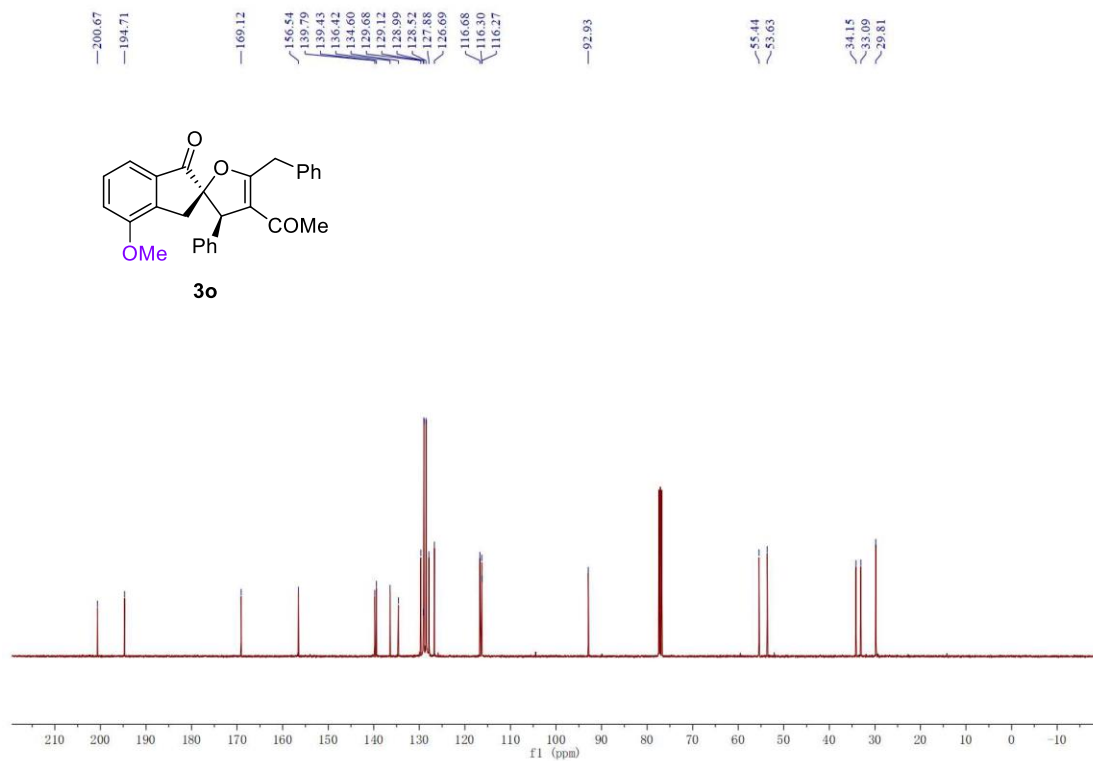

<sup>1</sup>H NMR (400 MHz, CDCl<sub>3</sub>)

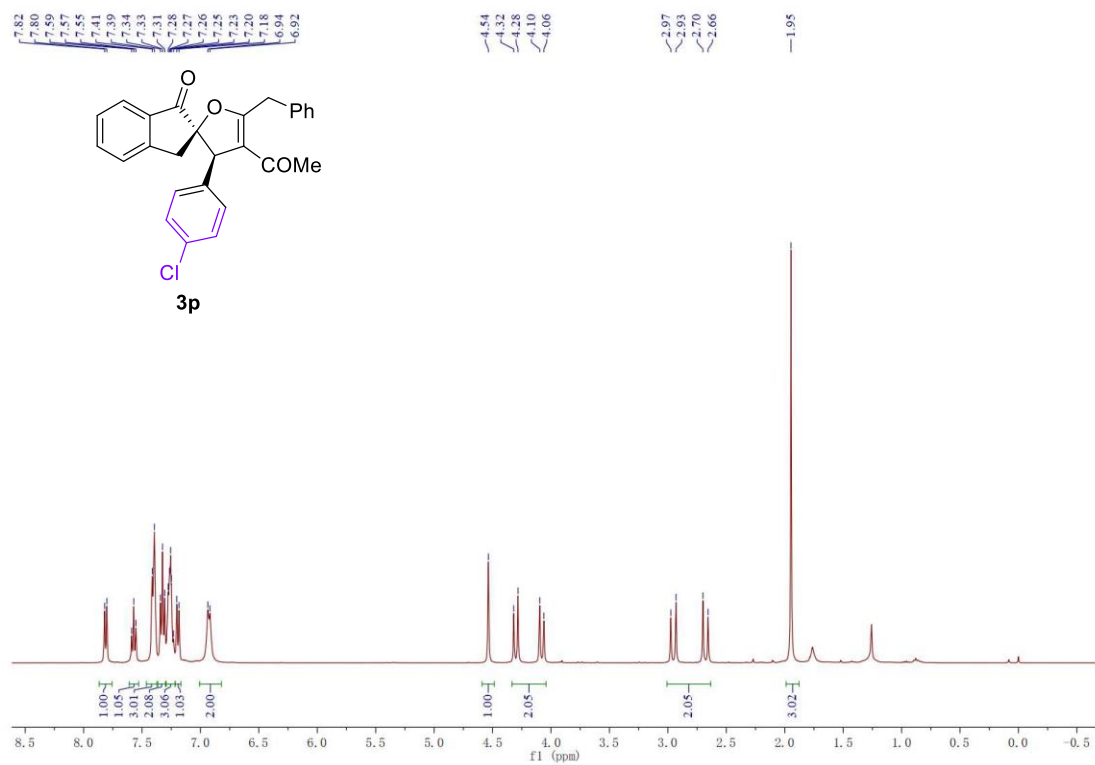

<sup>13</sup>C NMR (101 MHz, CDCl<sub>3</sub>)

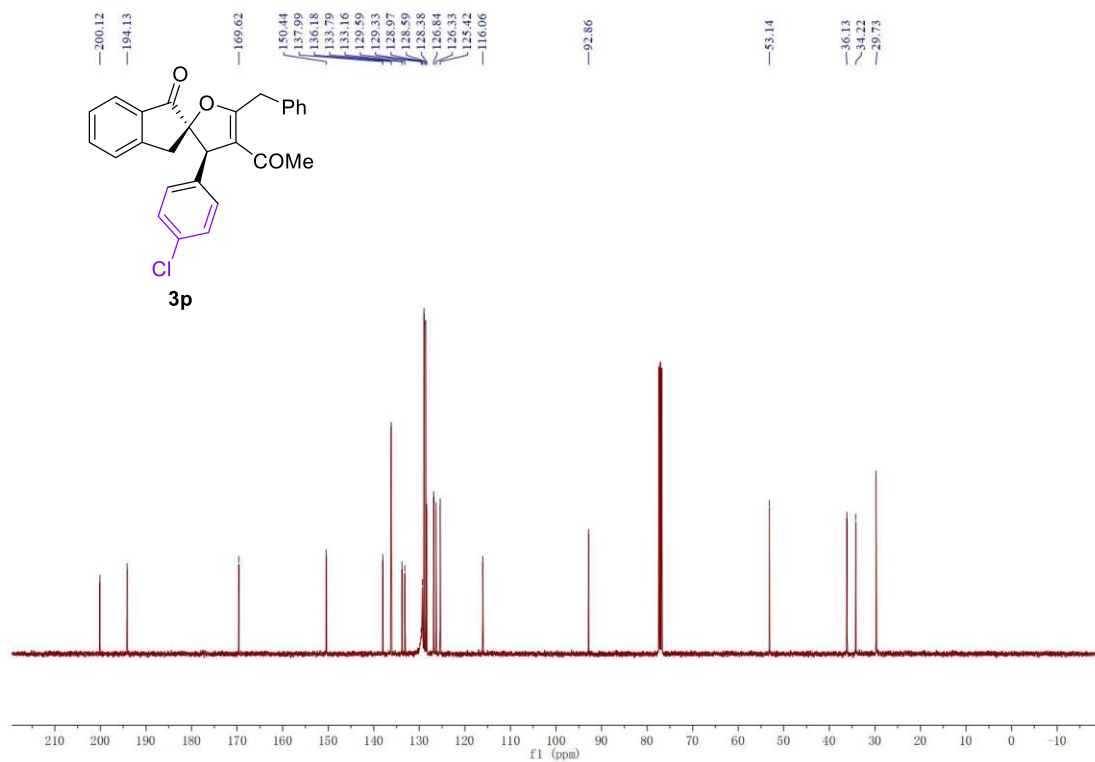

<sup>1</sup>H NMR (400 MHz, CDCl<sub>3</sub>)

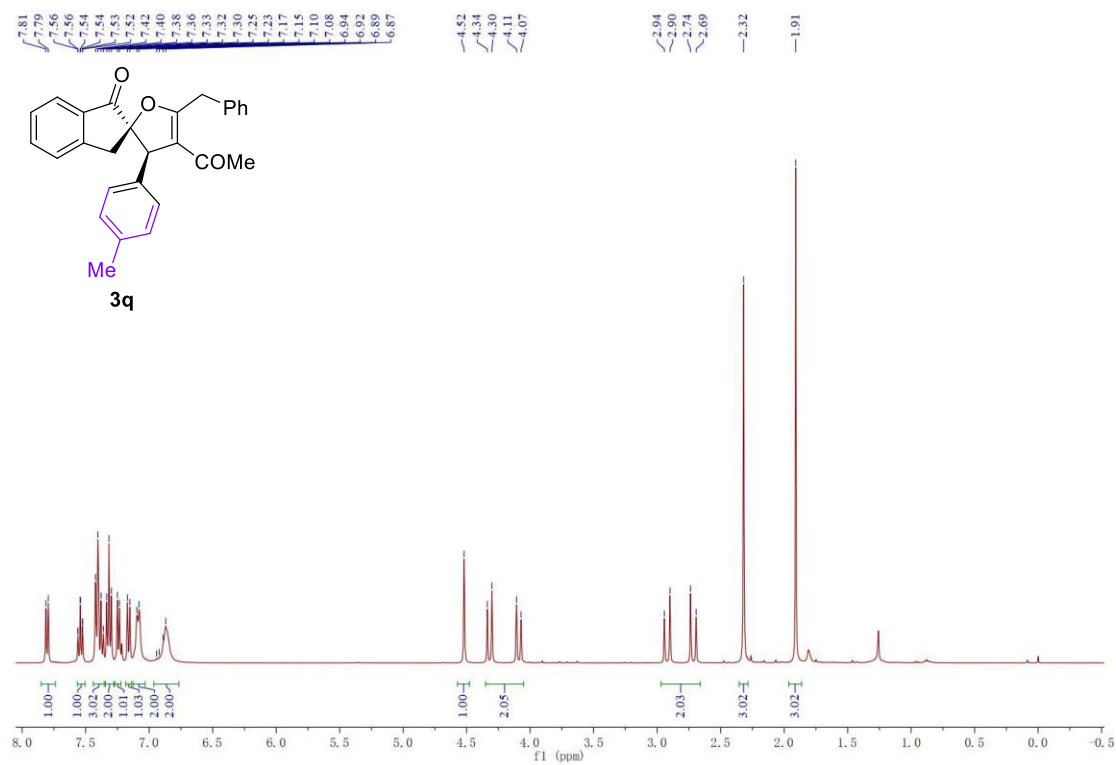

<sup>13</sup>C NMR (101 MHz, CDCl<sub>3</sub>)

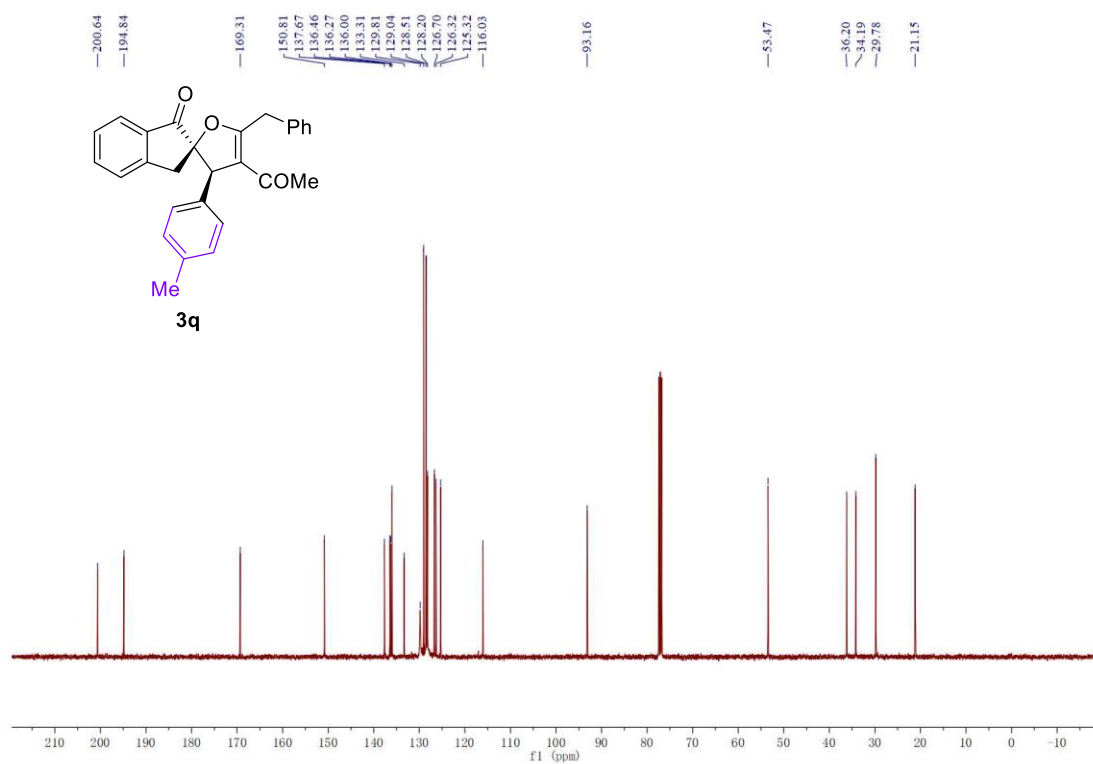

**<sup>1</sup>H NMR (400 MHz, CDCl<sub>3</sub>)**

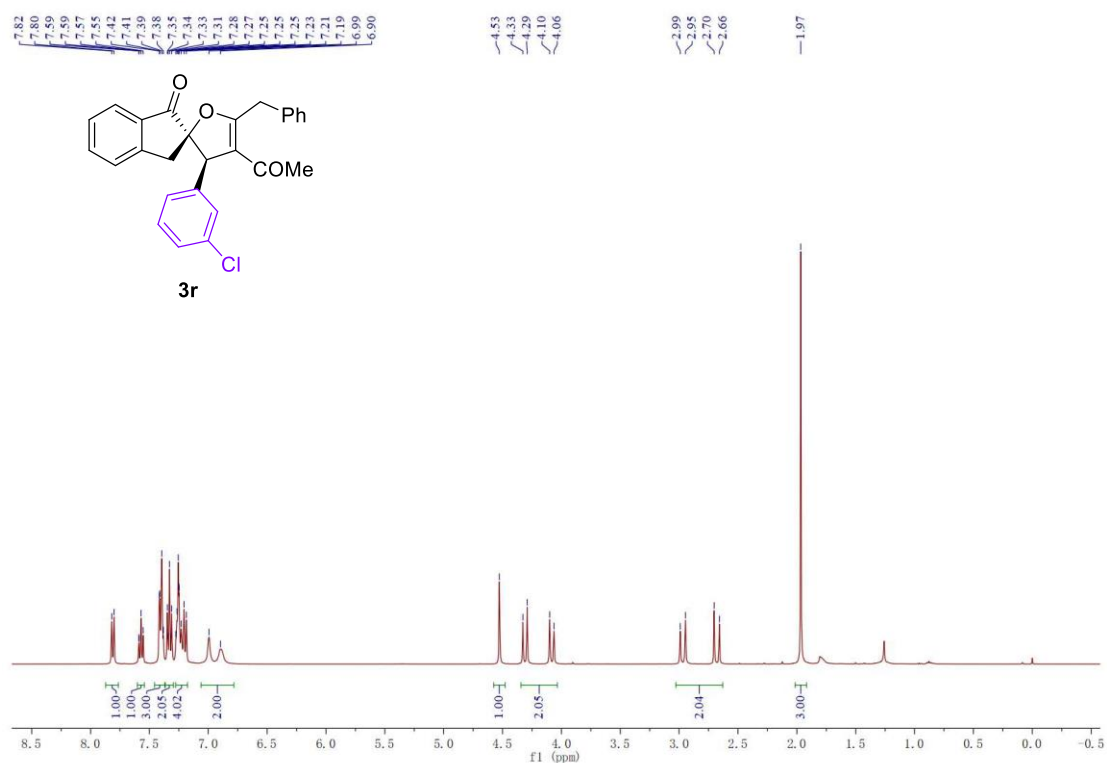

**<sup>13</sup>C NMR (101 MHz, CDCl<sub>3</sub>)**

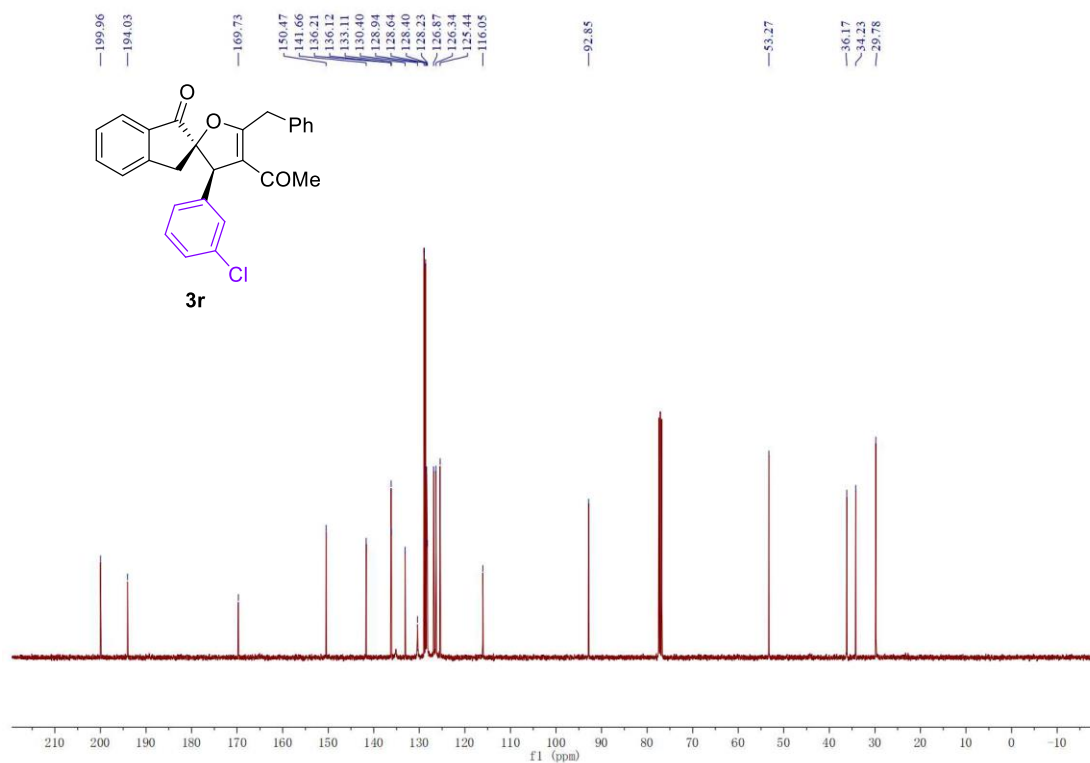



**<sup>1</sup>H NMR (400 MHz, CDCl<sub>3</sub>)**

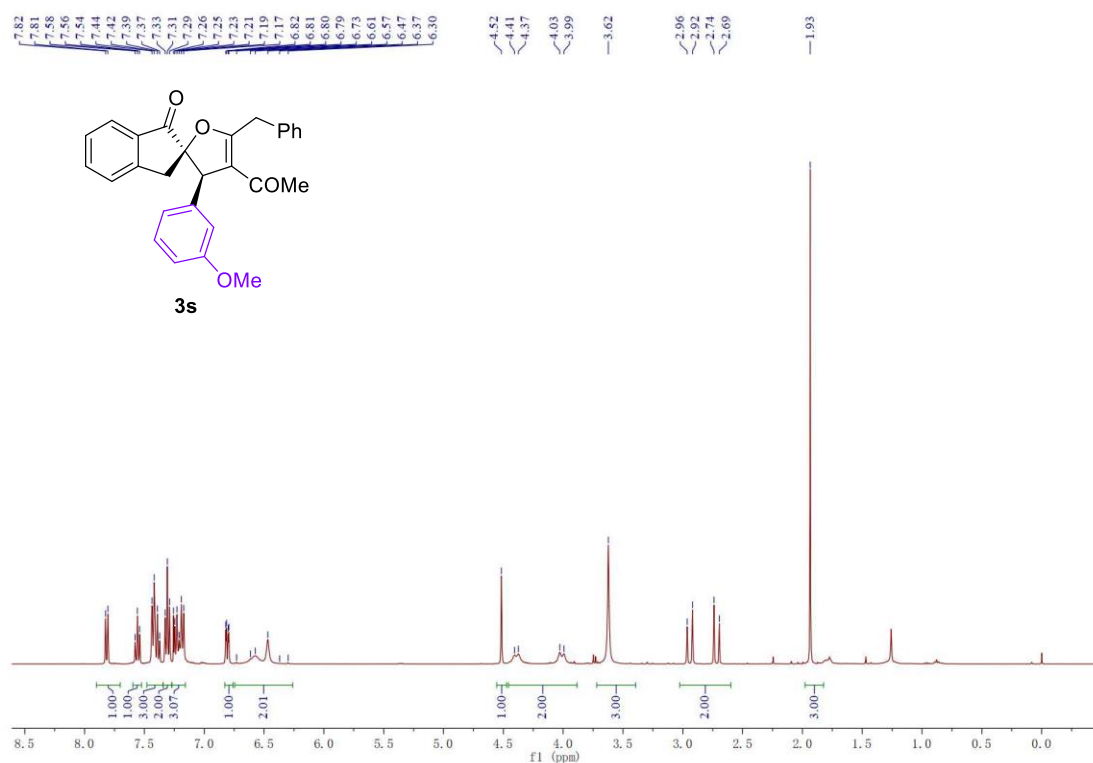

**<sup>13</sup>C NMR (101 MHz, CDCl<sub>3</sub>)**

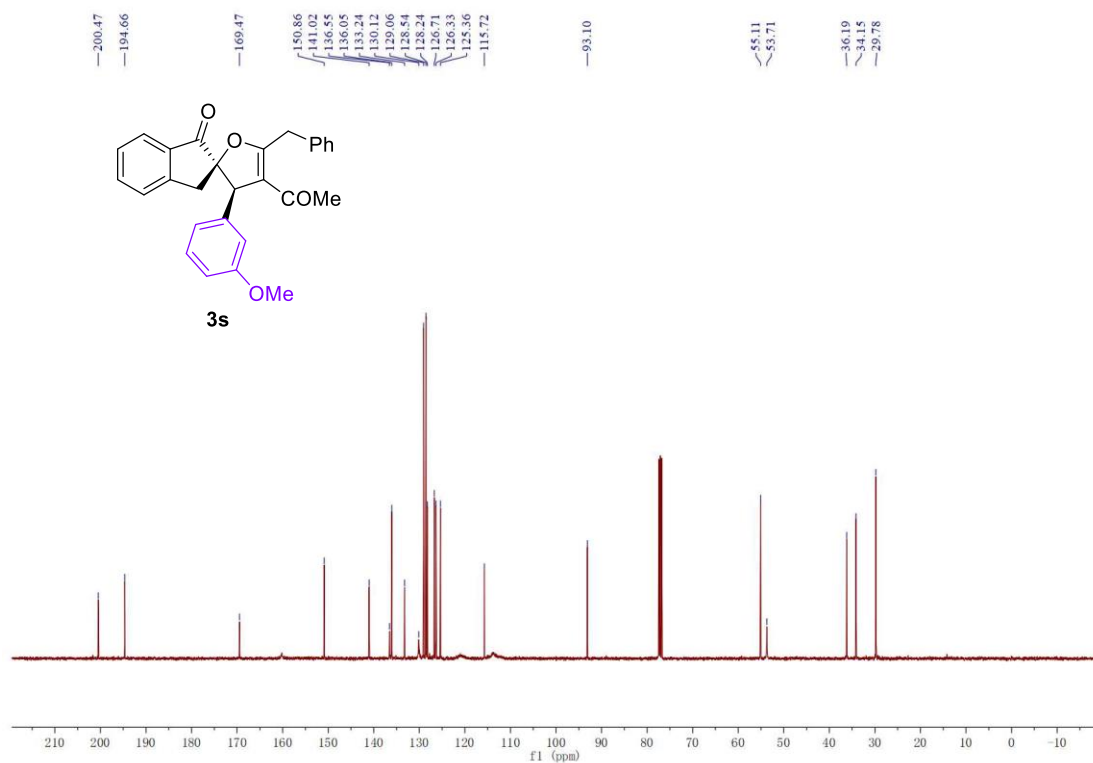

<sup>1</sup>H NMR (400 MHz, CDCl<sub>3</sub>)

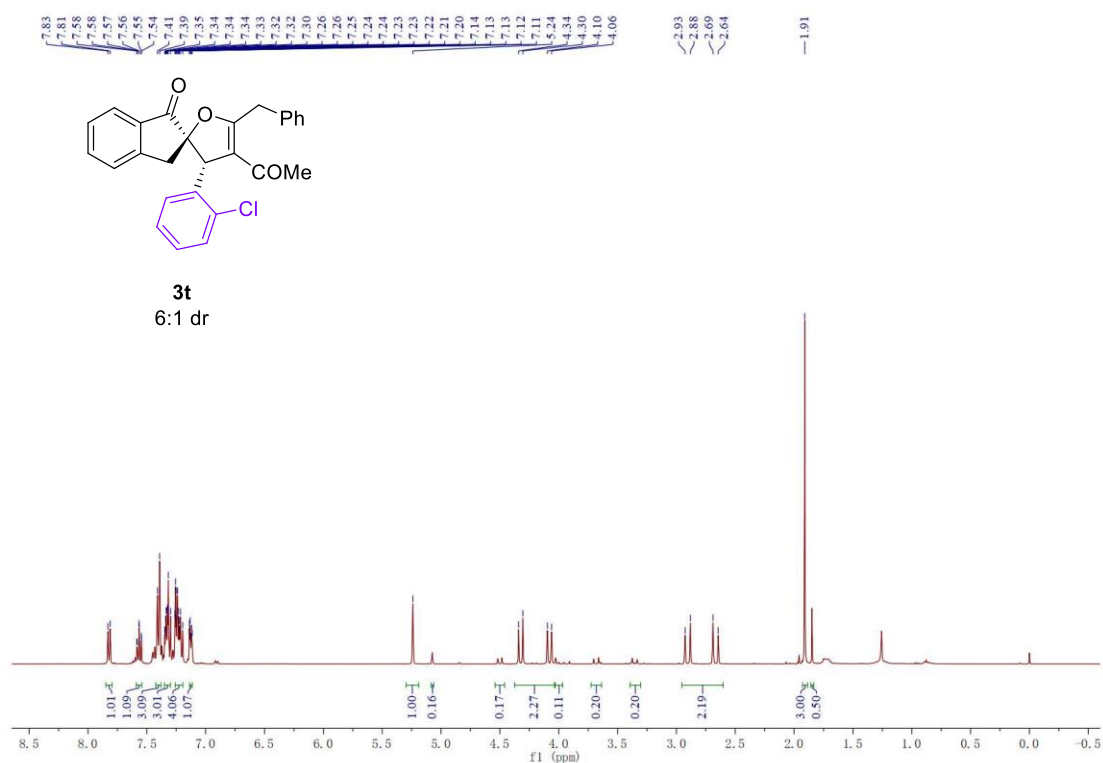

<sup>13</sup>C NMR (101 MHz, CDCl<sub>3</sub>)

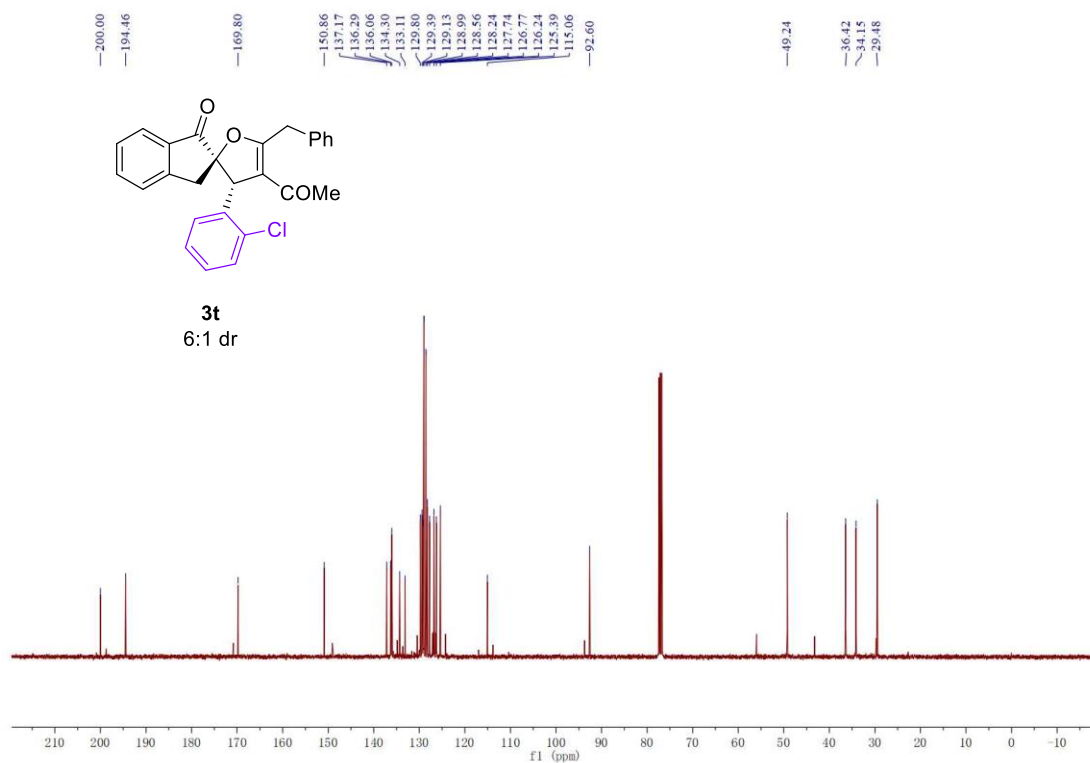

**<sup>1</sup>H NMR (400 MHz, CDCl<sub>3</sub>)**

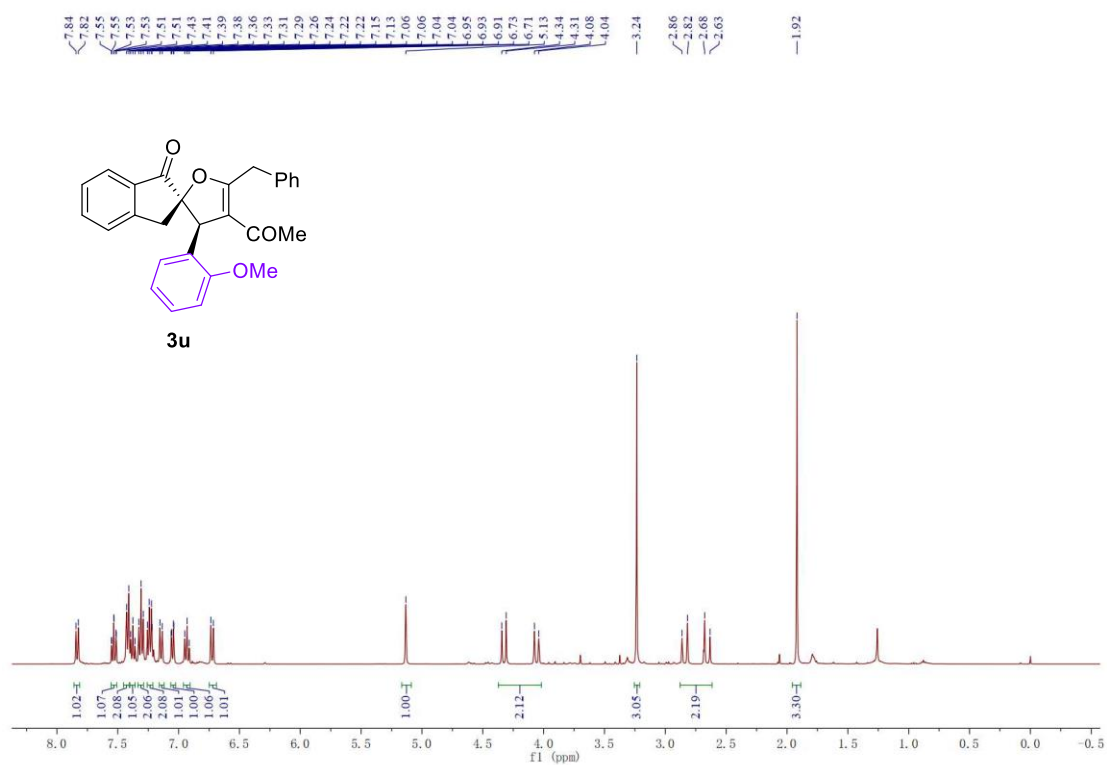

**<sup>13</sup>C NMR (101 MHz, CDCl<sub>3</sub>)**

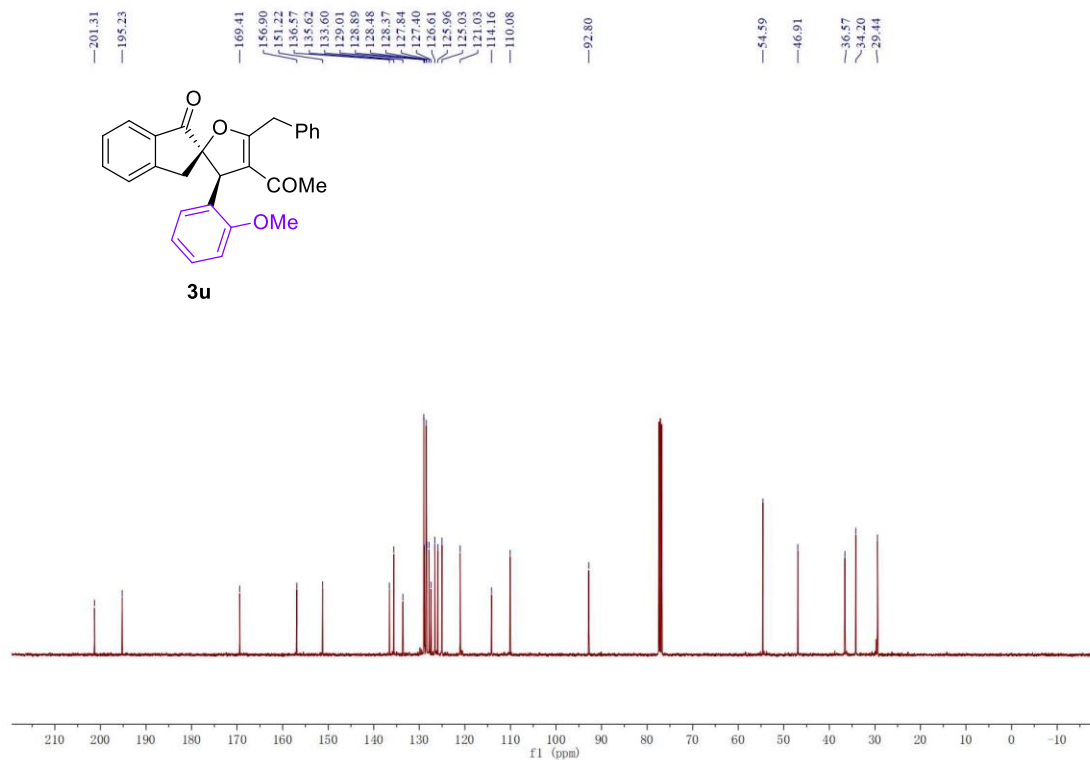

**<sup>1</sup>H NMR (400 MHz, CDCl<sub>3</sub>)**

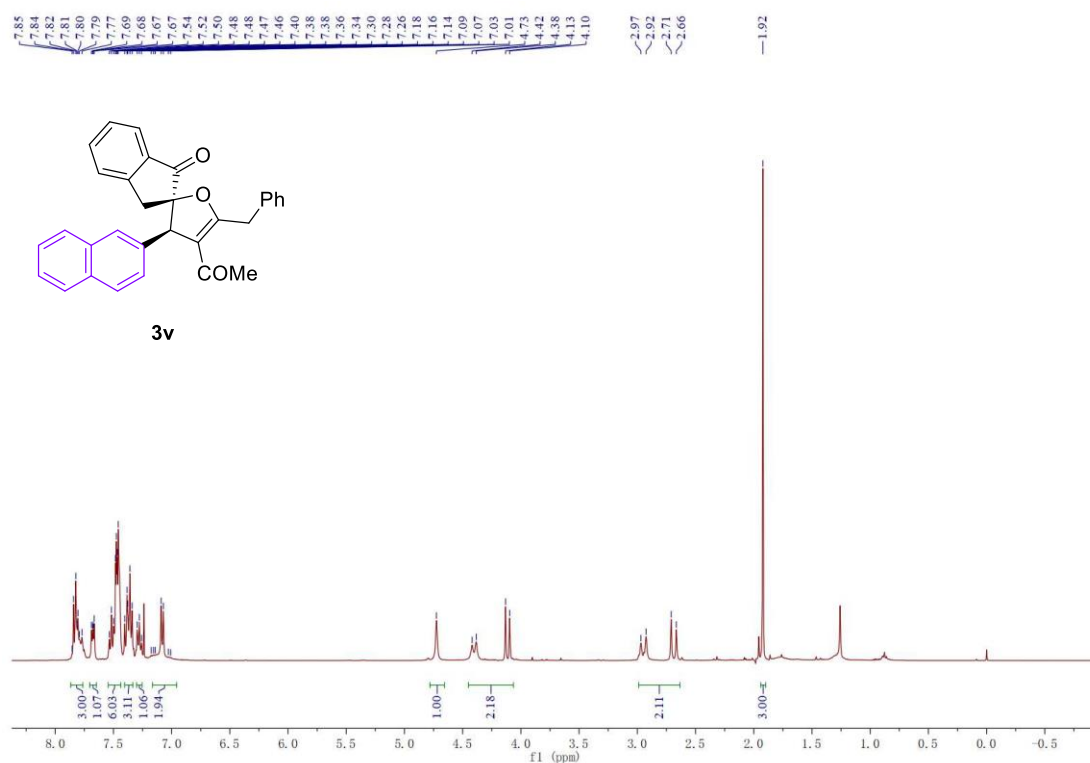

**<sup>13</sup>C NMR (101 MHz, CDCl<sub>3</sub>)**

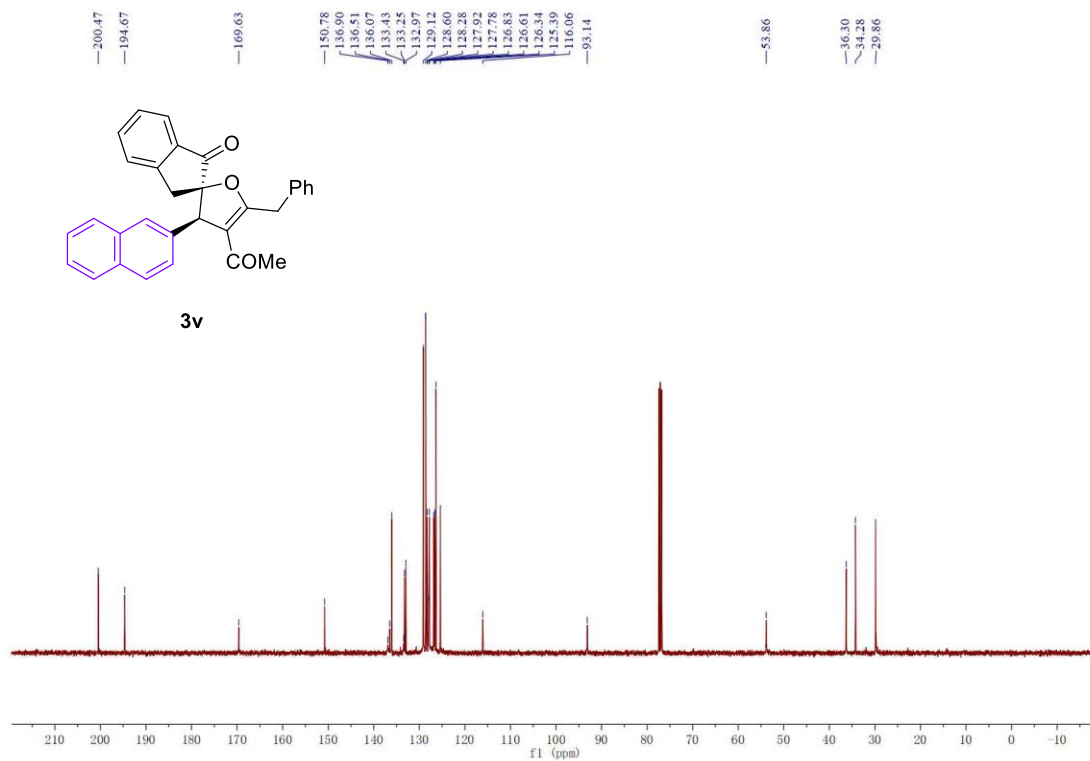

**<sup>1</sup>H NMR (400 MHz, CDCl<sub>3</sub>)**

7.82  
7.81  
7.80  
7.60  
7.59  
7.57  
7.56  
7.41  
7.40  
7.39  
7.34  
7.33  
7.32  
7.30  
7.25  
7.25  
7.24  
7.24  
6.97  
6.96  
6.95  
6.73  
6.72

—4.82

—4.35

—4.31

—4.07

—4.04

—3.03

—2.99

—2.89

—2.84

—2.01

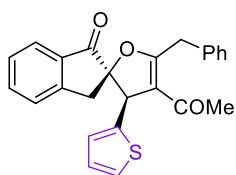

**3w**  
2.5:1 dr

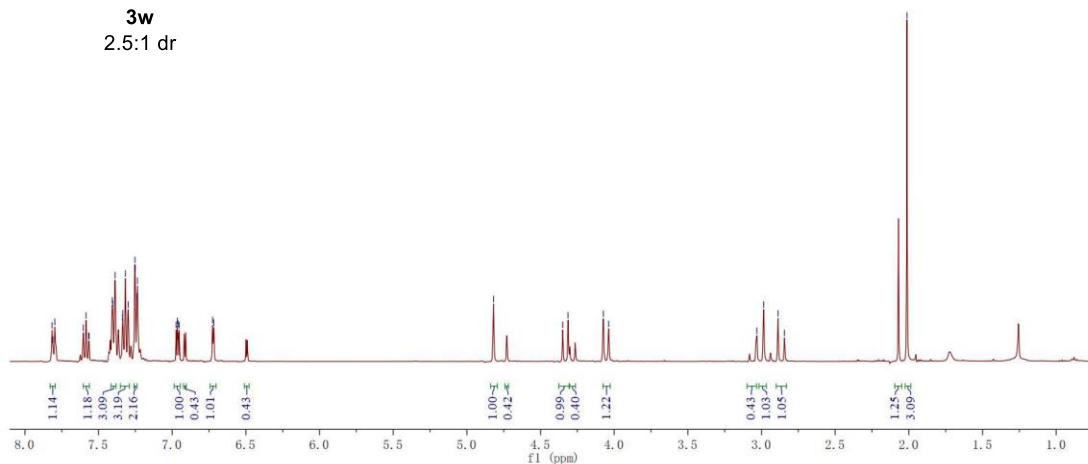

**<sup>13</sup>C NMR (101 MHz, CDCl<sub>3</sub>)**

—200.06

—194.29

—169.56

—150.82

—143.86

—136.29

—136.15

—133.15

—129.00

—128.50

—128.31

—127.54

—126.73

—126.38

—126.29

—125.76

—125.38

—116.25

—92.99

—48.72

—35.68

—34.18

—29.46

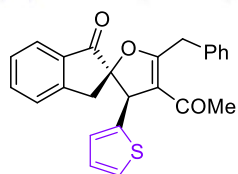

**3w**  
2.5:1 dr

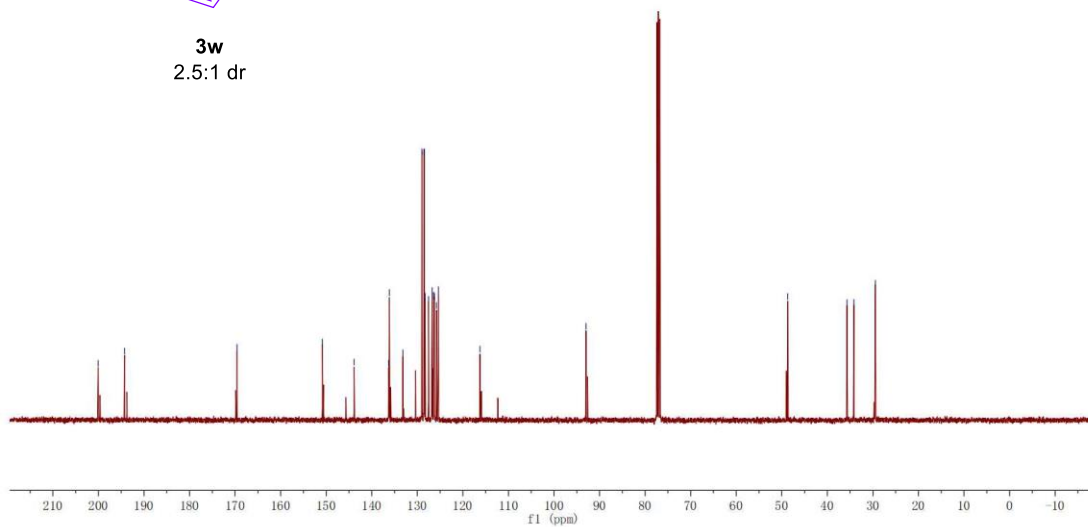

**<sup>1</sup>H NMR (400 MHz, CDCl<sub>3</sub>)**

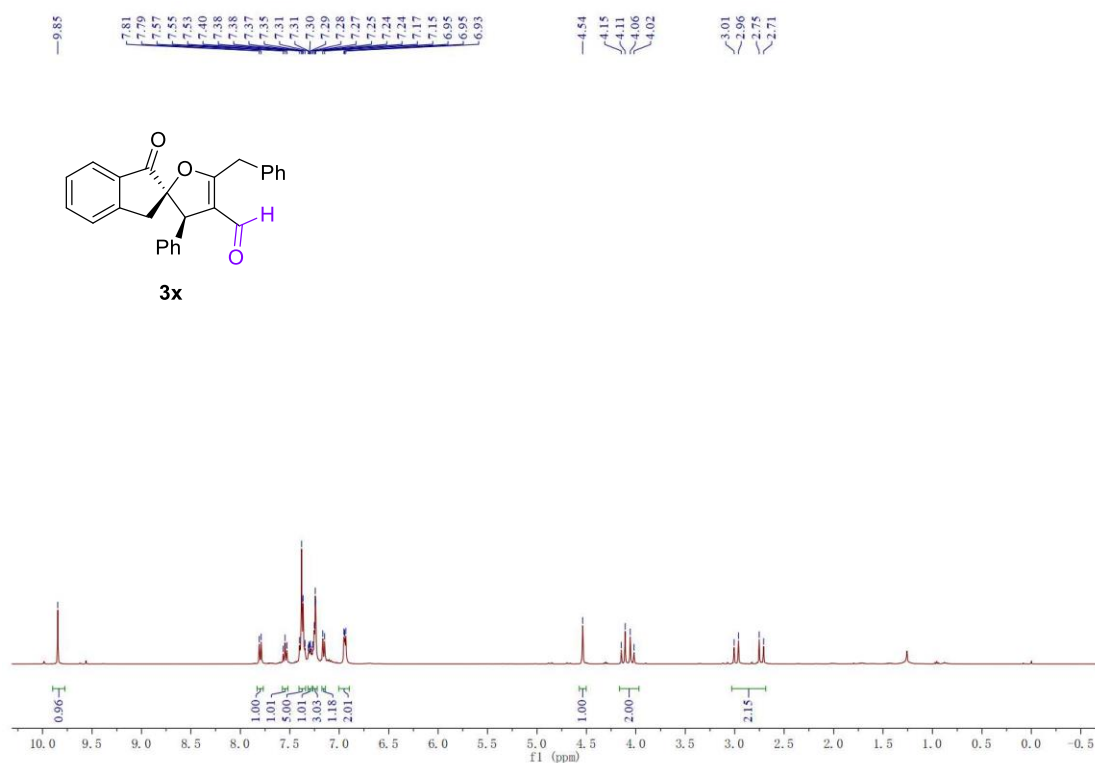

**<sup>13</sup>C NMR (101 MHz, CDCl<sub>3</sub>)**

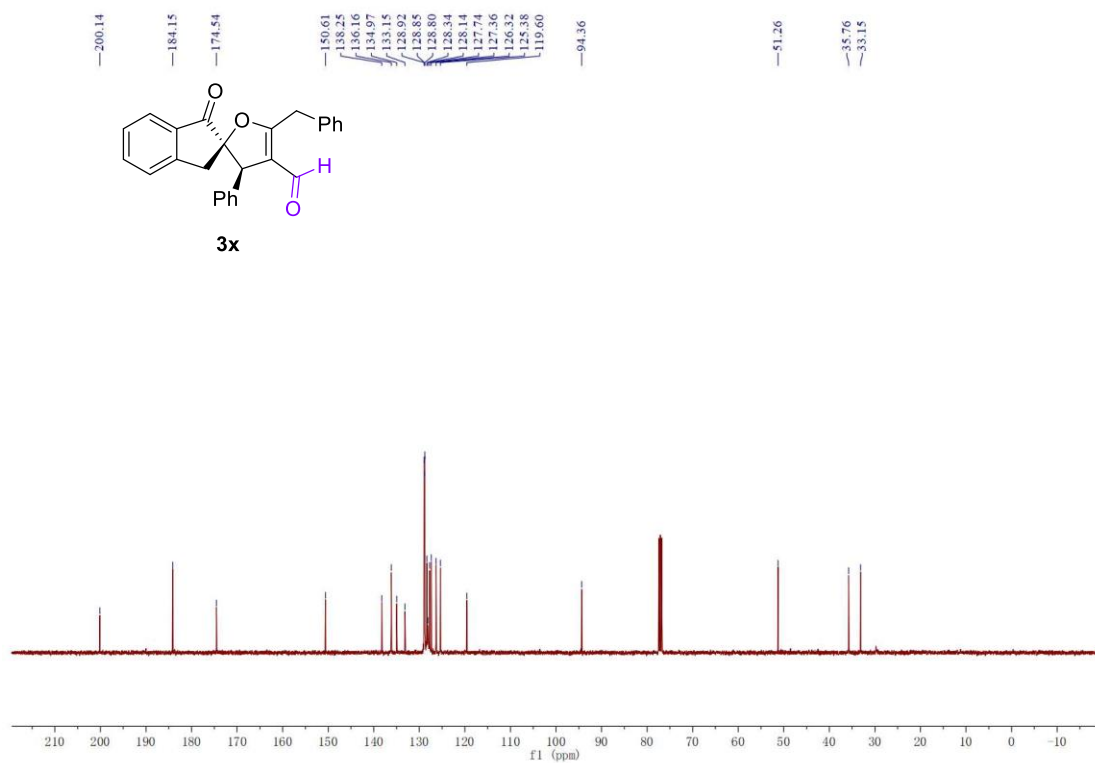

**<sup>1</sup>H NMR (400 MHz, CDCl<sub>3</sub>)**

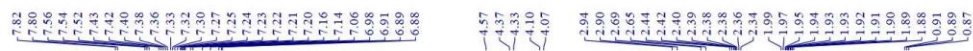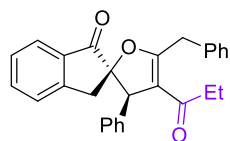

**3y**  
10:1 dr

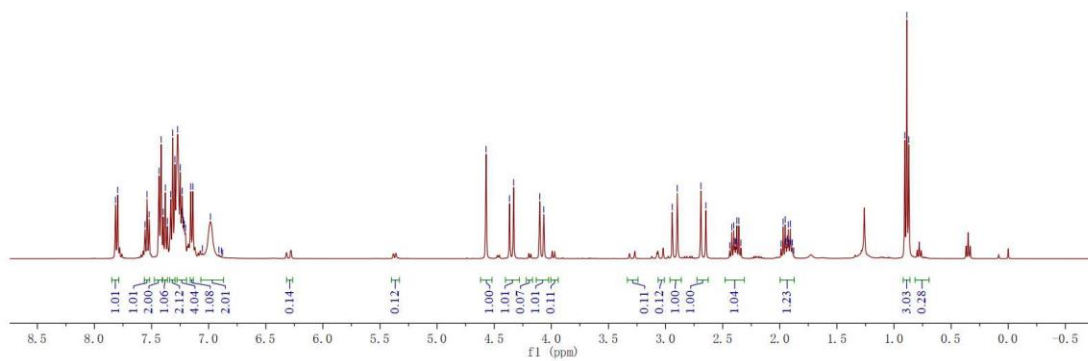

**<sup>13</sup>C NMR (101 MHz, CDCl<sub>3</sub>)**

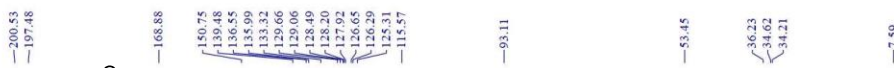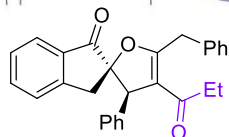

**3y**  
10:1 dr

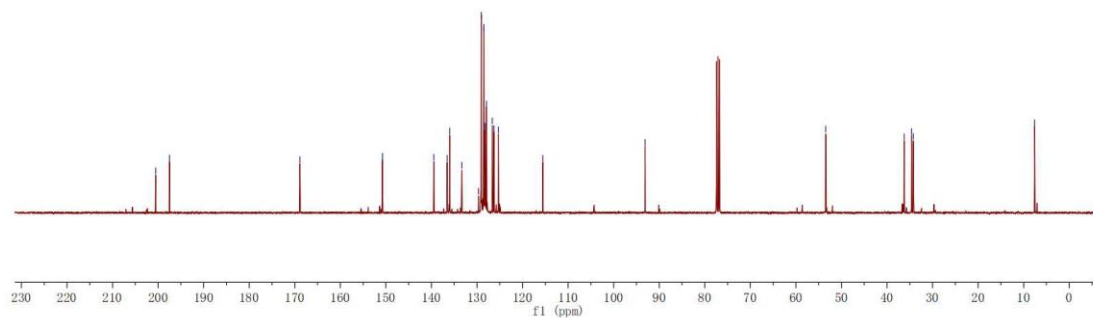

**<sup>1</sup>H NMR (400 MHz, CDCl<sub>3</sub>)**

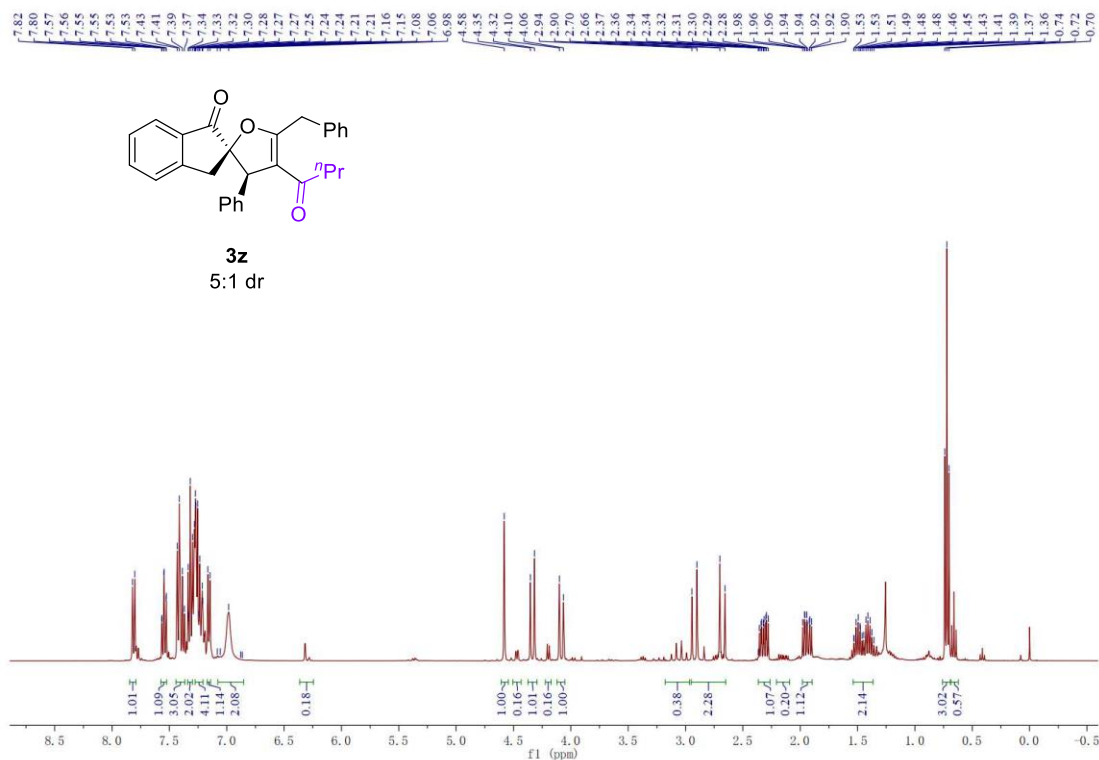

**<sup>13</sup>C NMR (101 MHz, CDCl<sub>3</sub>)**

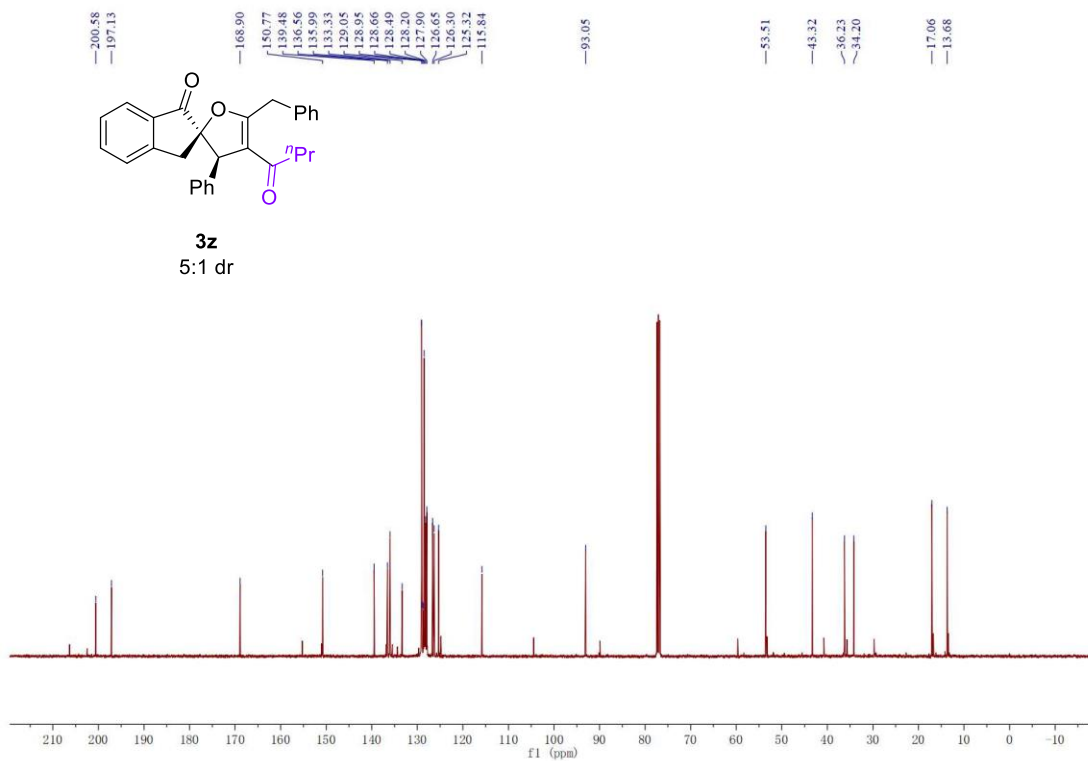



**<sup>1</sup>H NMR (400 MHz, CDCl<sub>3</sub>)**

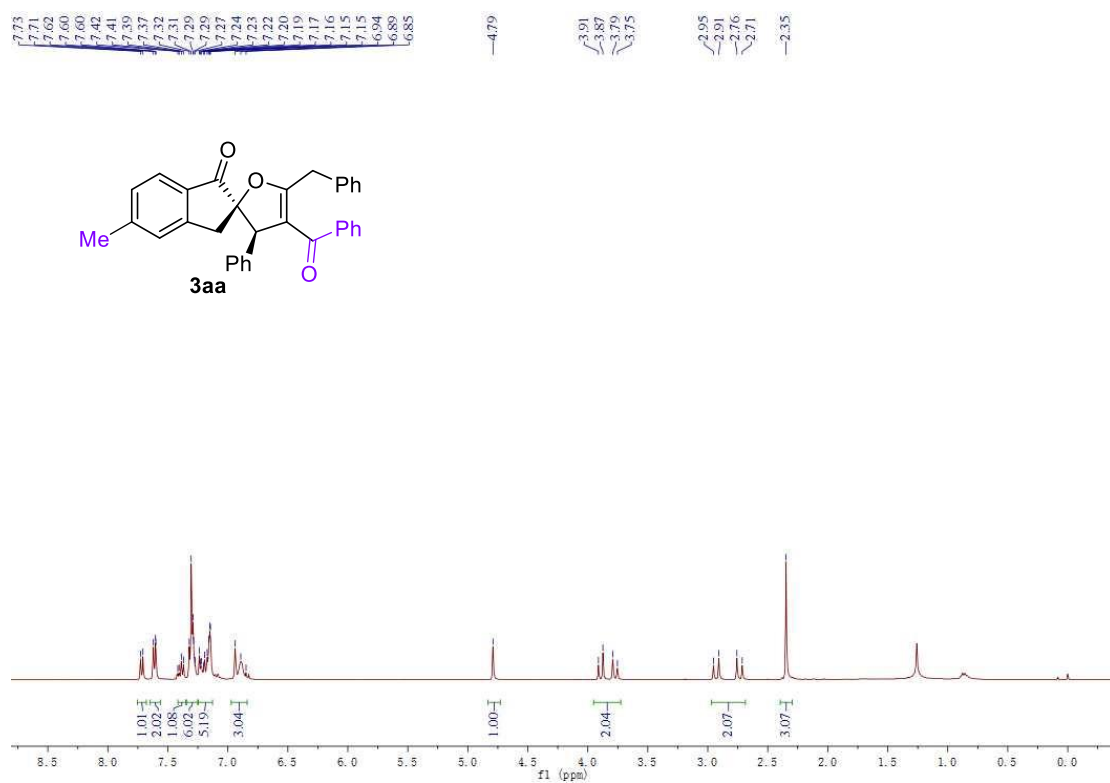

**<sup>13</sup>C NMR (101 MHz, CDCl<sub>3</sub>)**

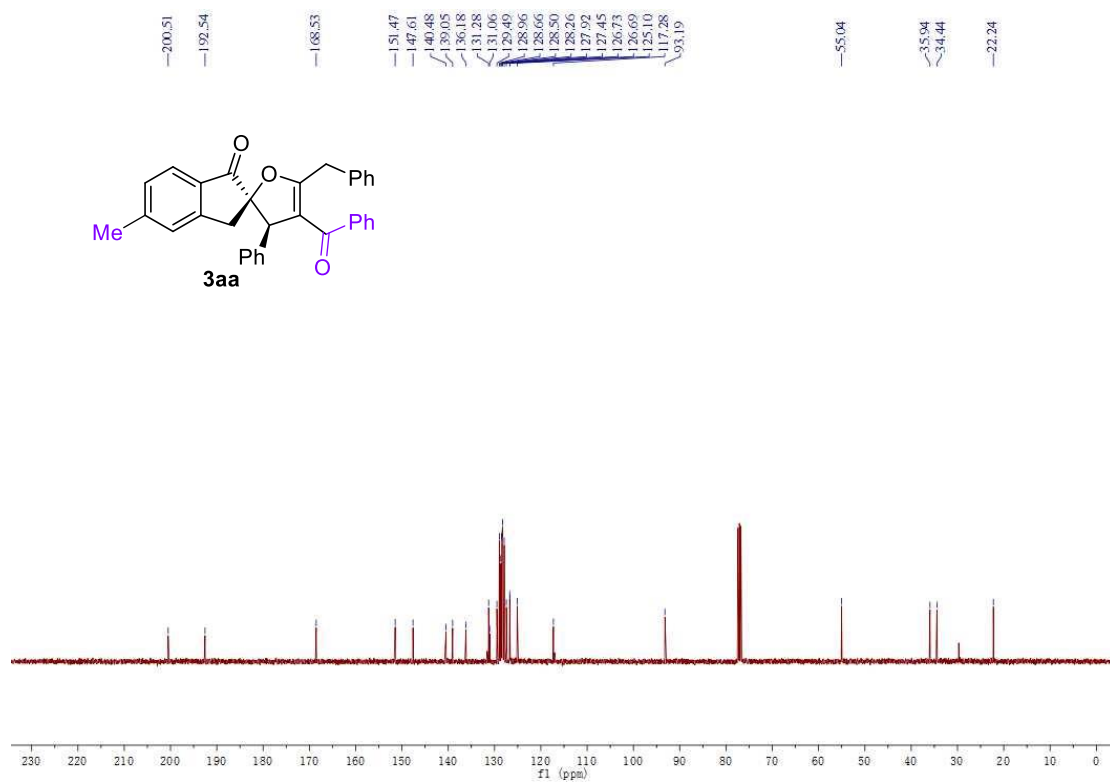

**<sup>1</sup>H NMR (400 MHz, CDCl<sub>3</sub>)**

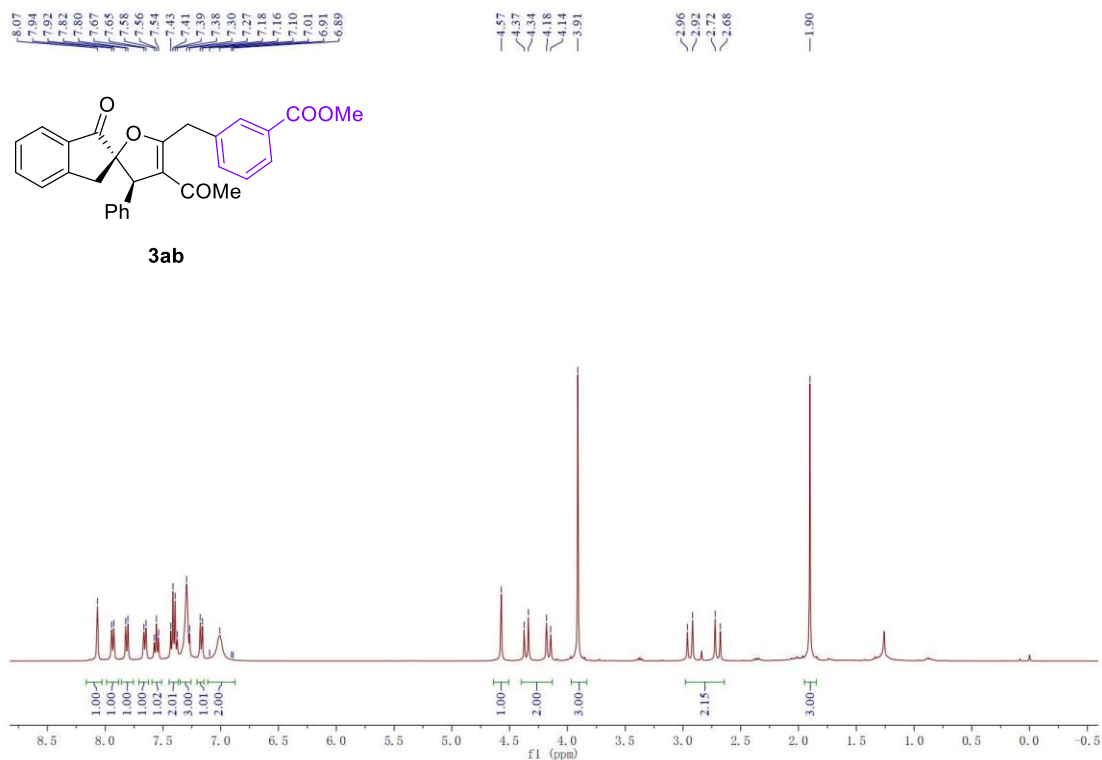

**<sup>13</sup>C NMR (101 MHz, CDCl<sub>3</sub>)**

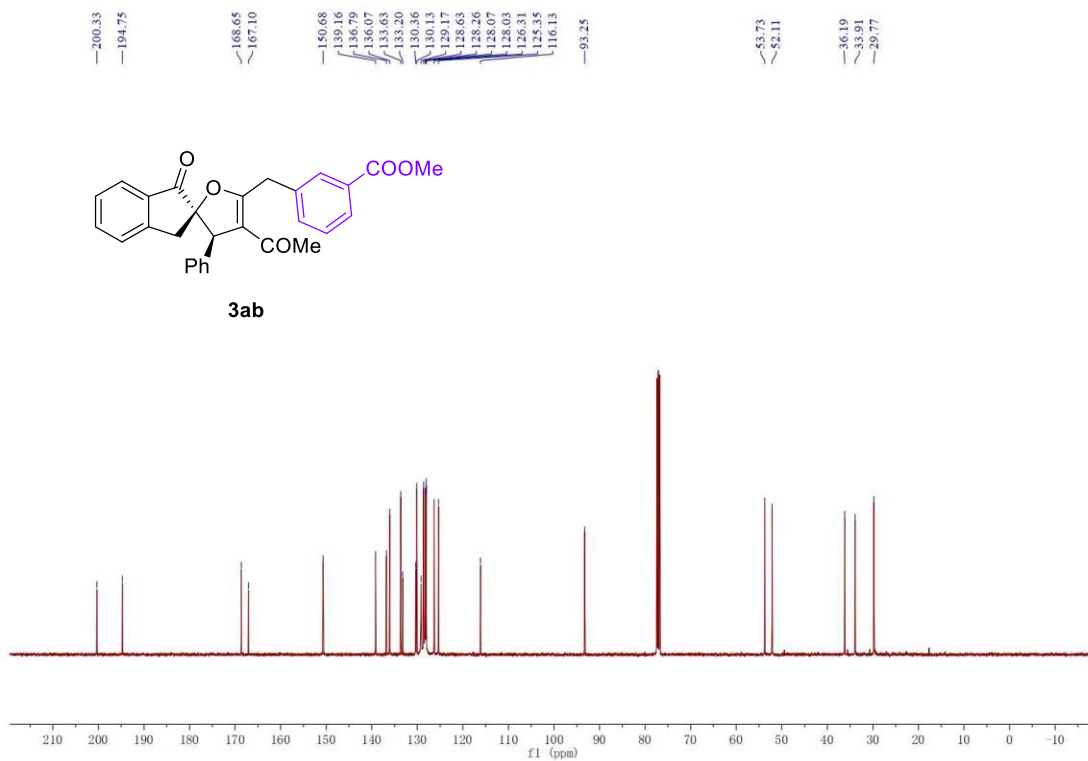

**<sup>1</sup>H NMR (400 MHz, CDCl<sub>3</sub>)**

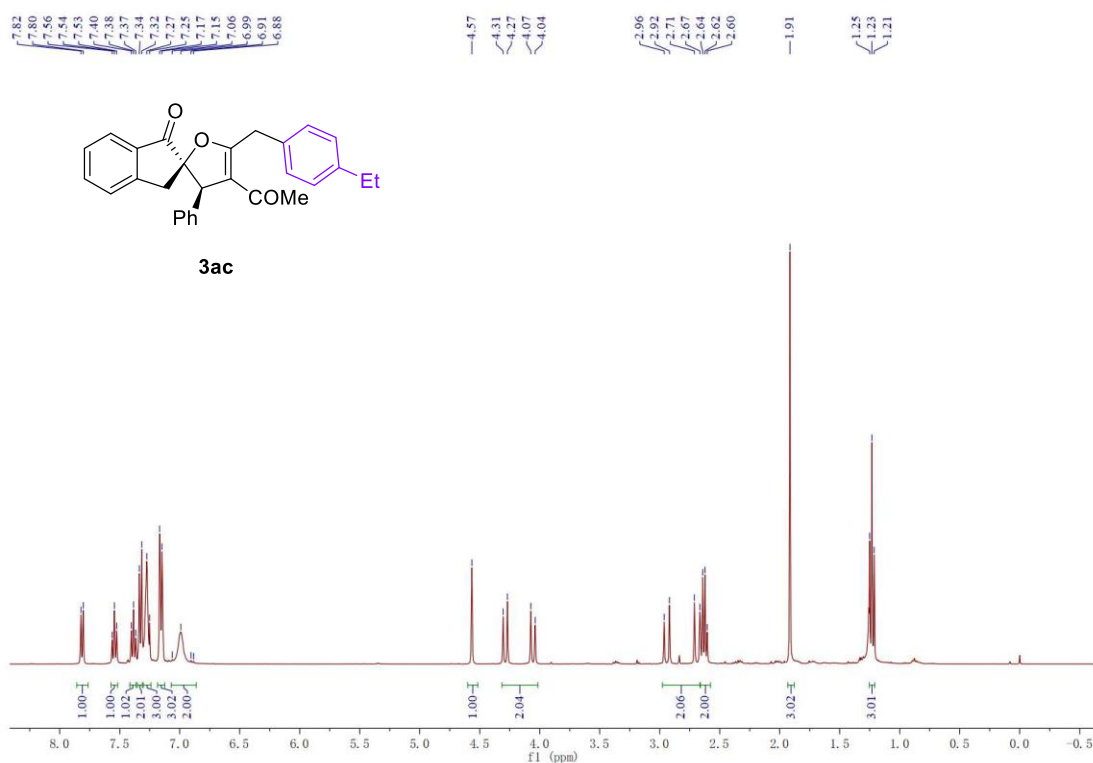

**<sup>13</sup>C NMR (101 MHz, CDCl<sub>3</sub>)**

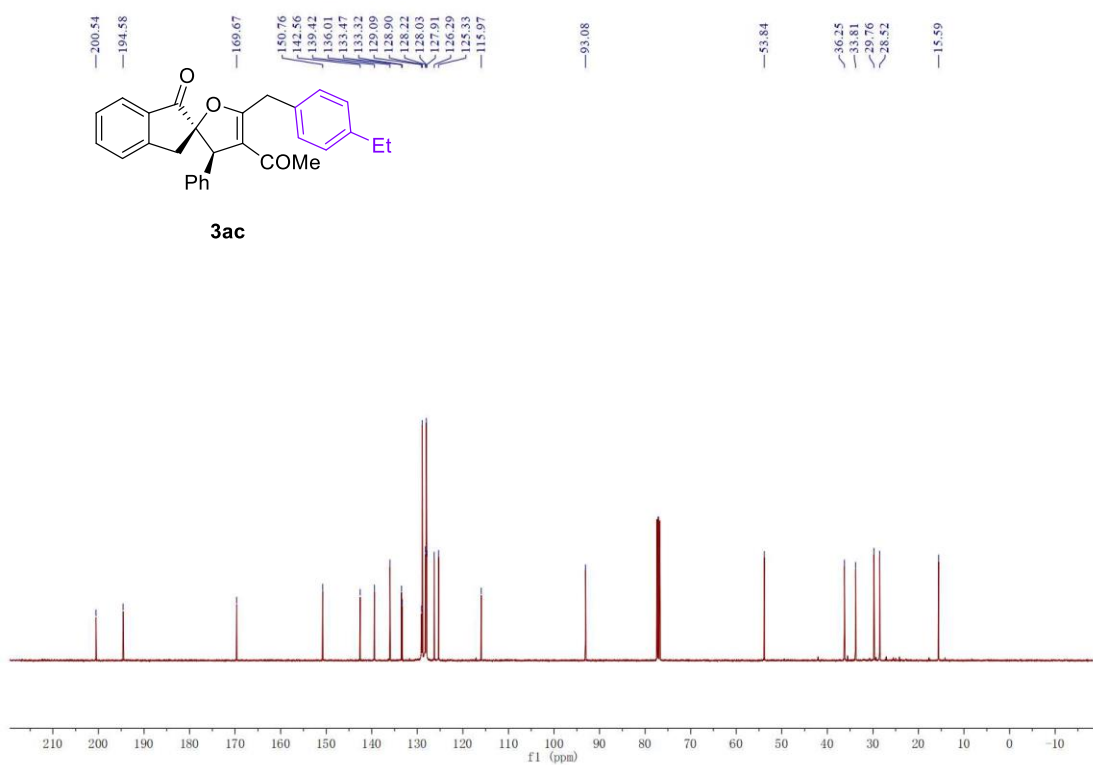

**<sup>1</sup>H NMR (400 MHz, CDCl<sub>3</sub>)**

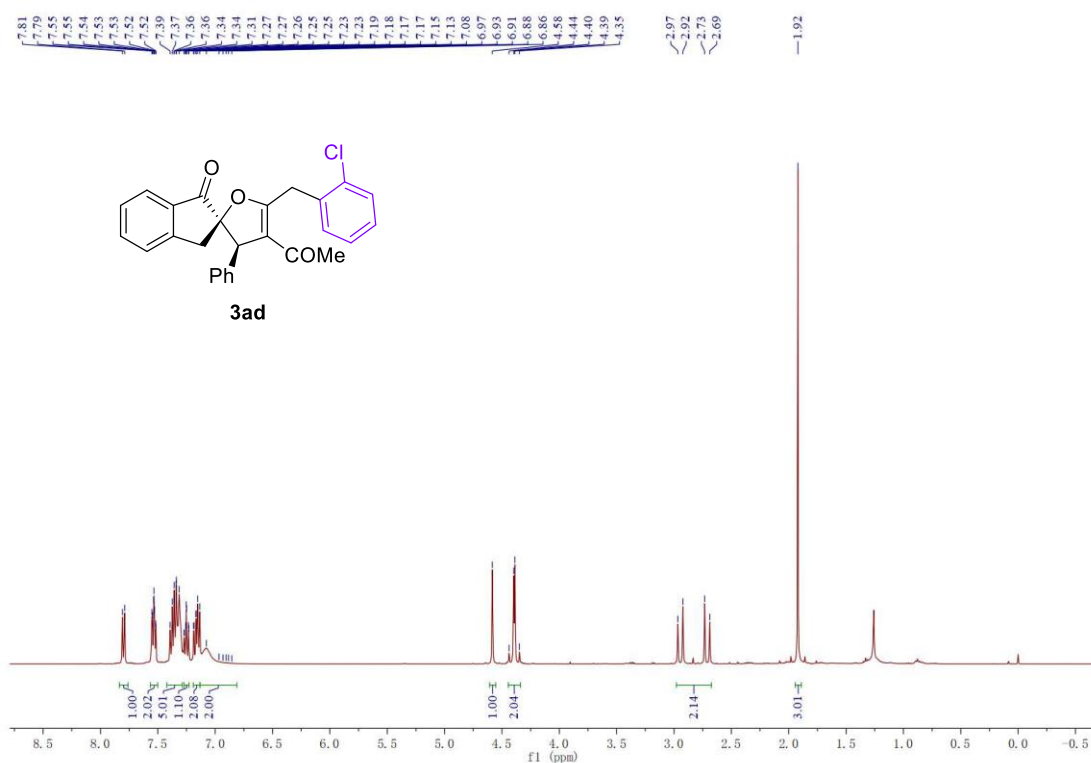

**<sup>13</sup>C NMR (101 MHz, CDCl<sub>3</sub>)**

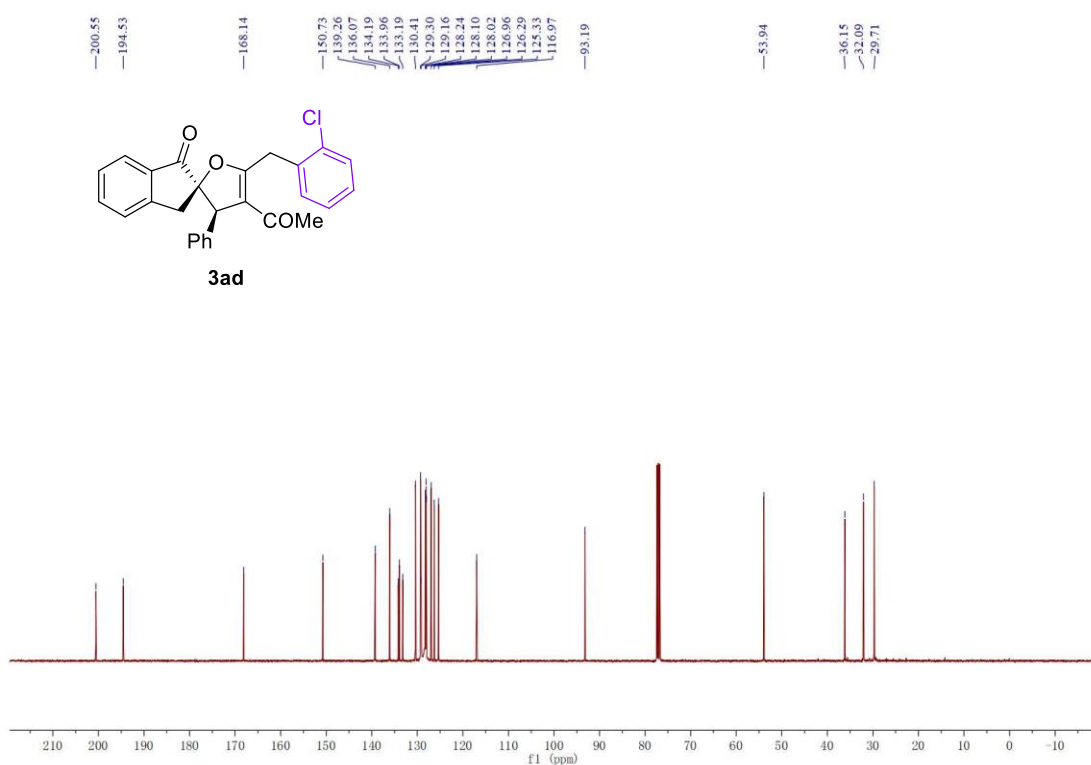

**<sup>1</sup>H NMR (400 MHz, CDCl<sub>3</sub>)**

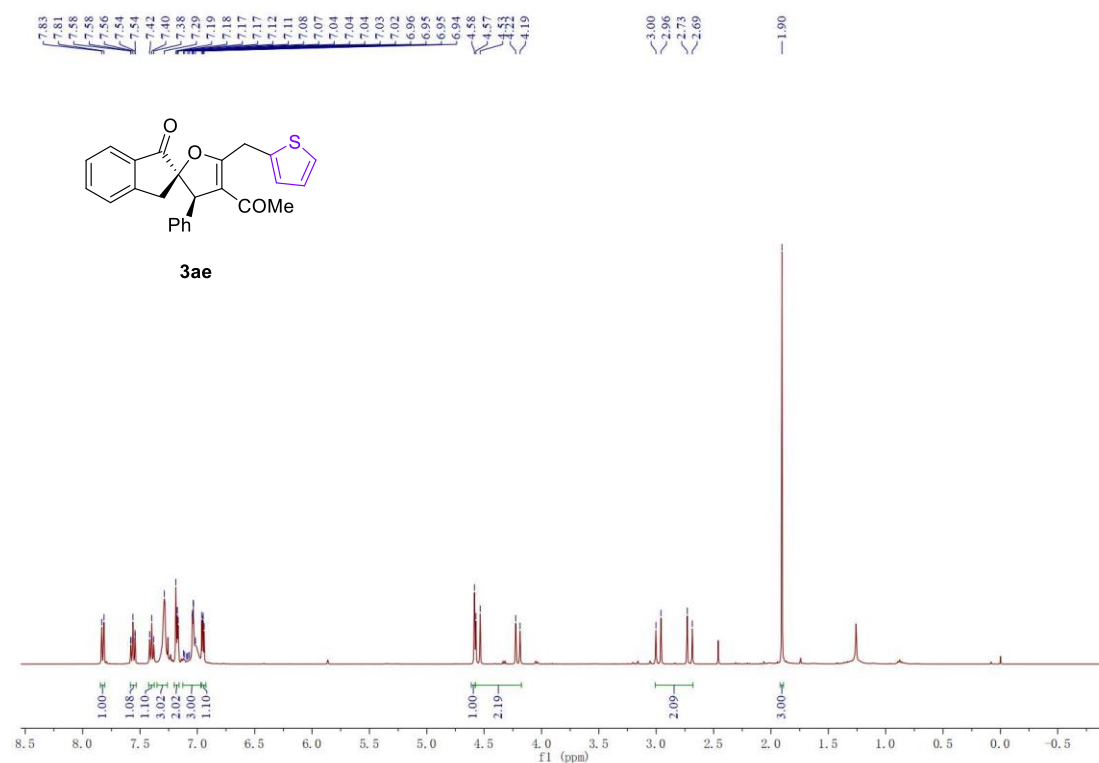

**<sup>13</sup>C NMR (101 MHz, CDCl<sub>3</sub>)**

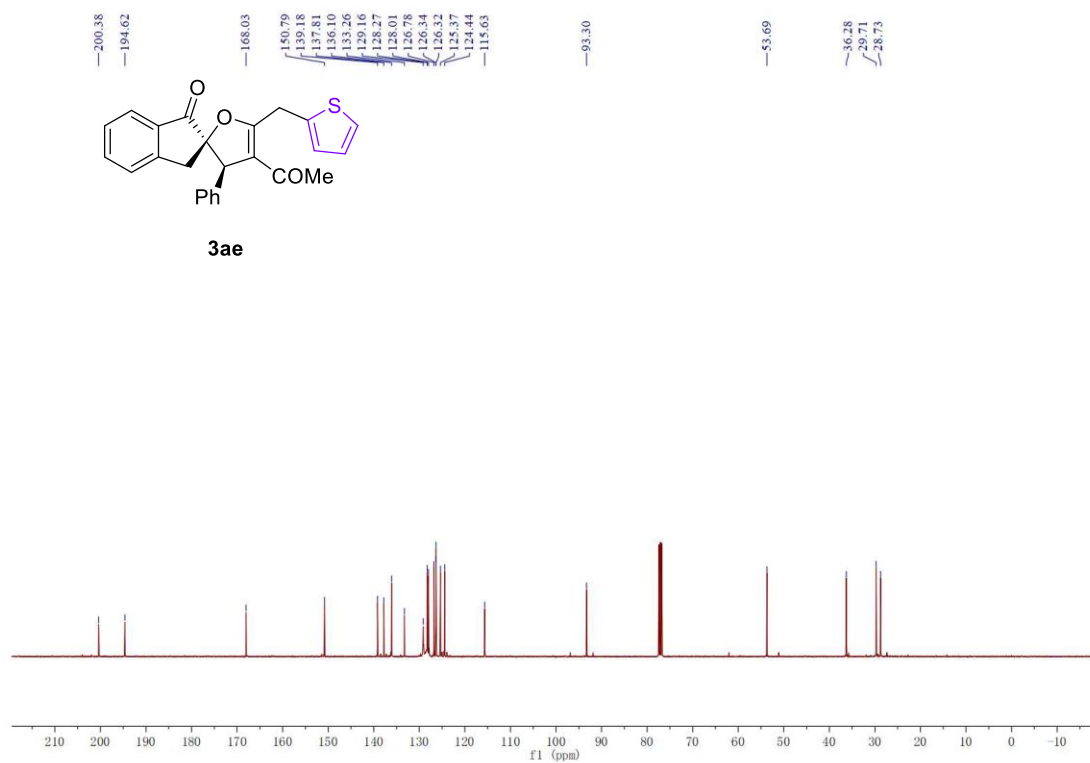

**<sup>1</sup>H NMR (400 MHz, CDCl<sub>3</sub>)**

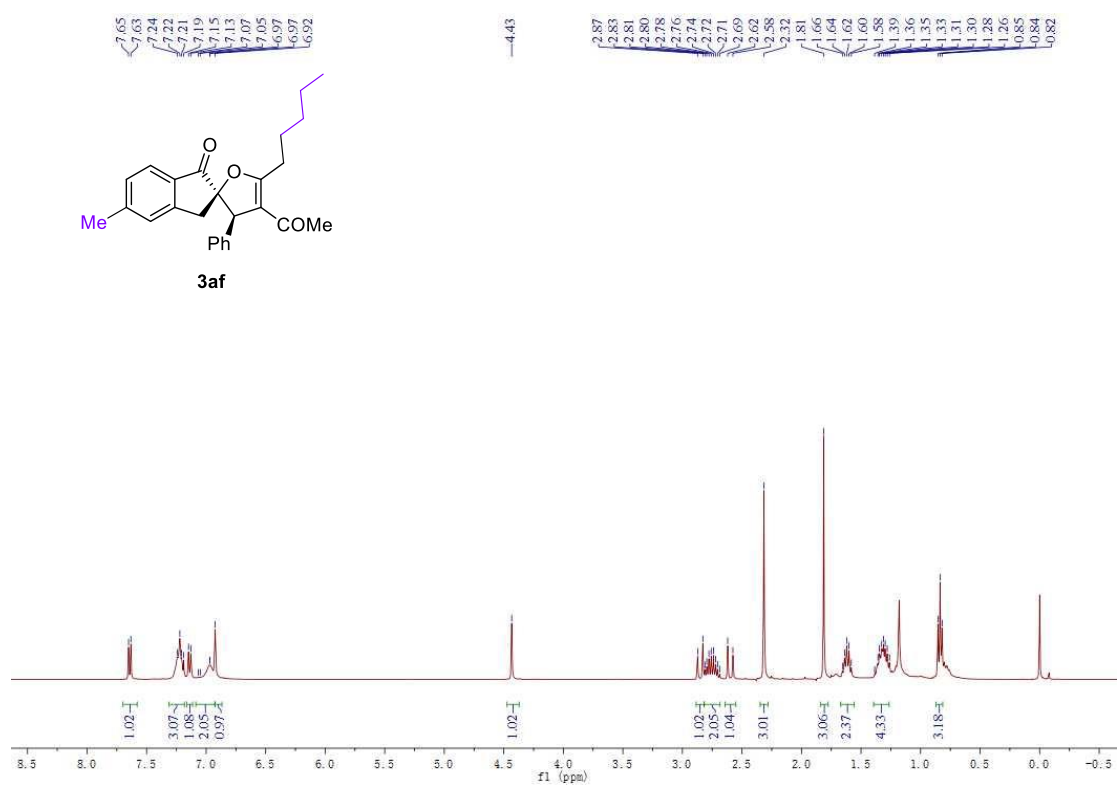

**<sup>13</sup>C NMR (101 MHz, CDCl<sub>3</sub>)**

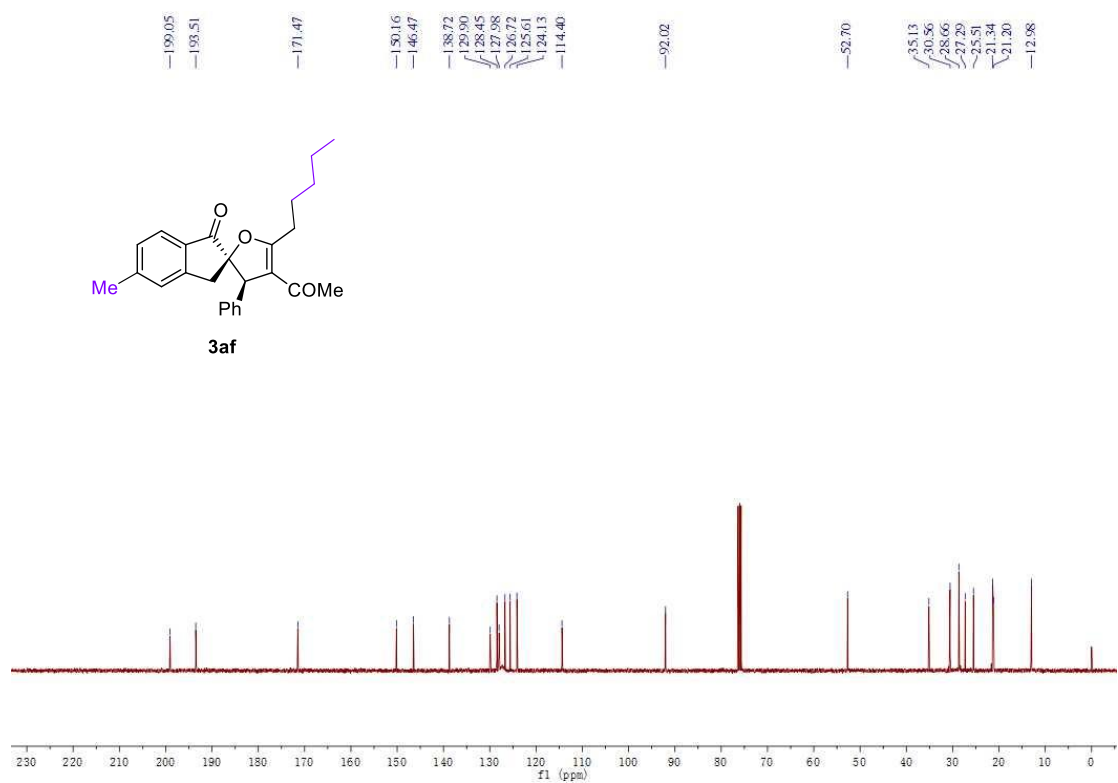

**<sup>1</sup>H NMR (400 MHz, CDCl<sub>3</sub>)**

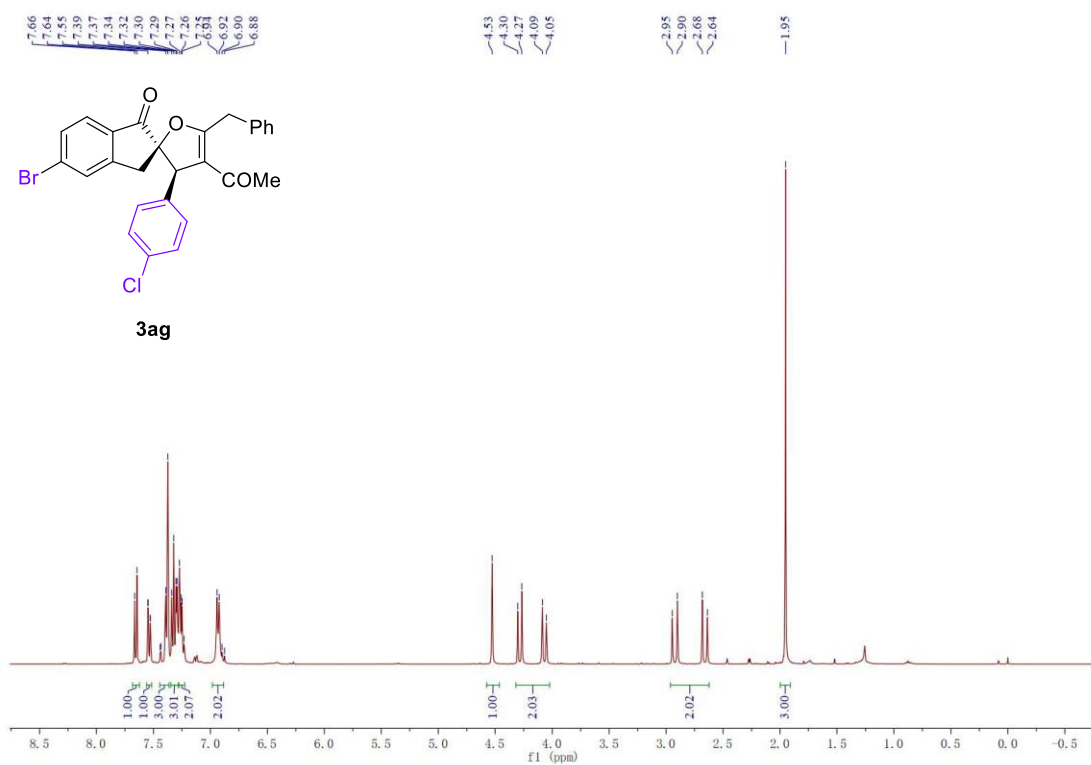

**<sup>13</sup>C NMR (101 MHz, CDCl<sub>3</sub>)**

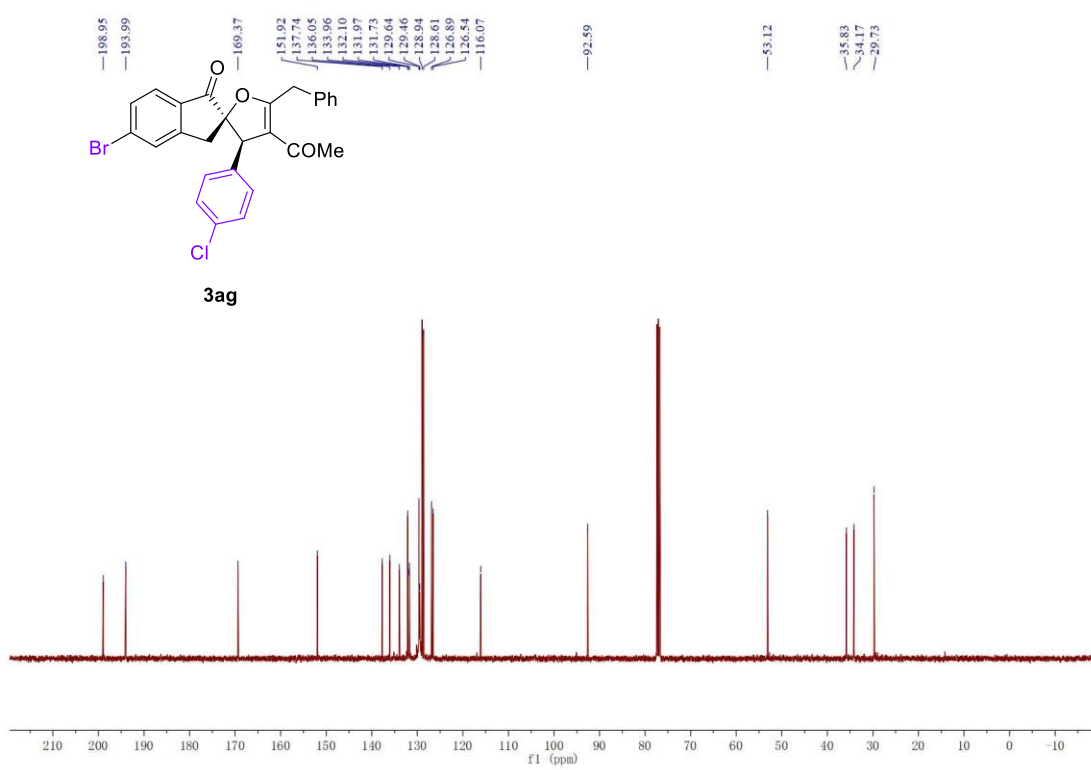

<sup>1</sup>H NMR (400 MHz, CDCl<sub>3</sub>)

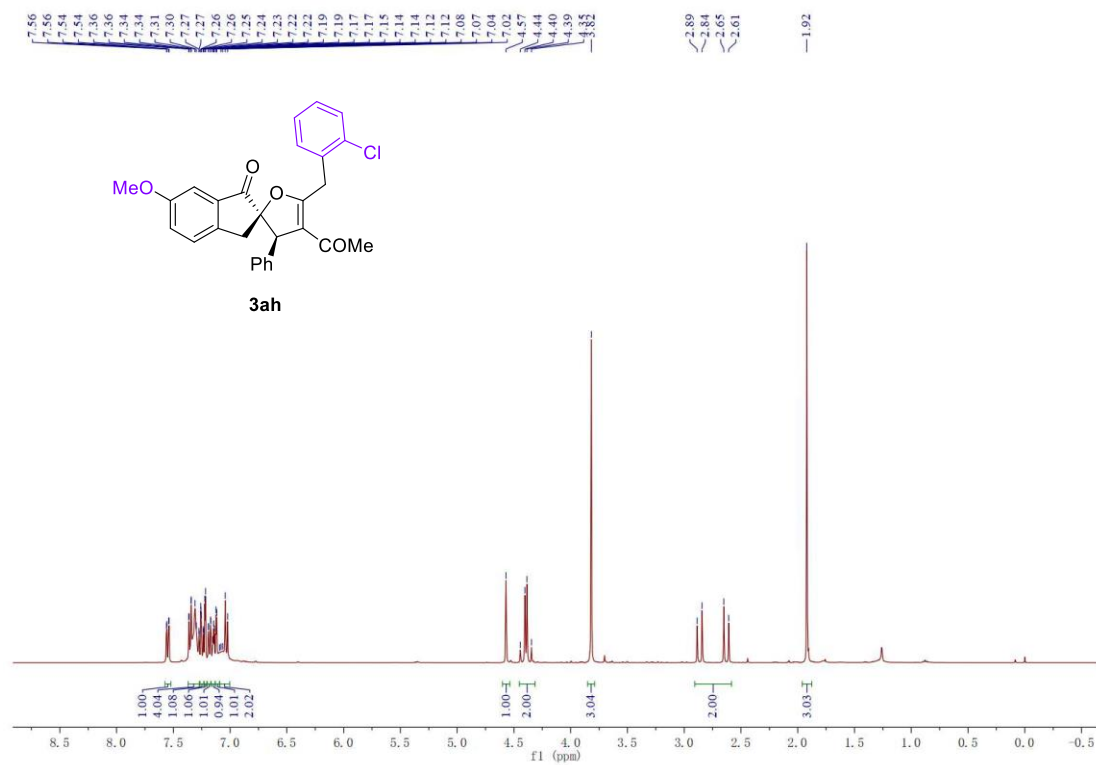

<sup>13</sup>C NMR (101 MHz, CDCl<sub>3</sub>)

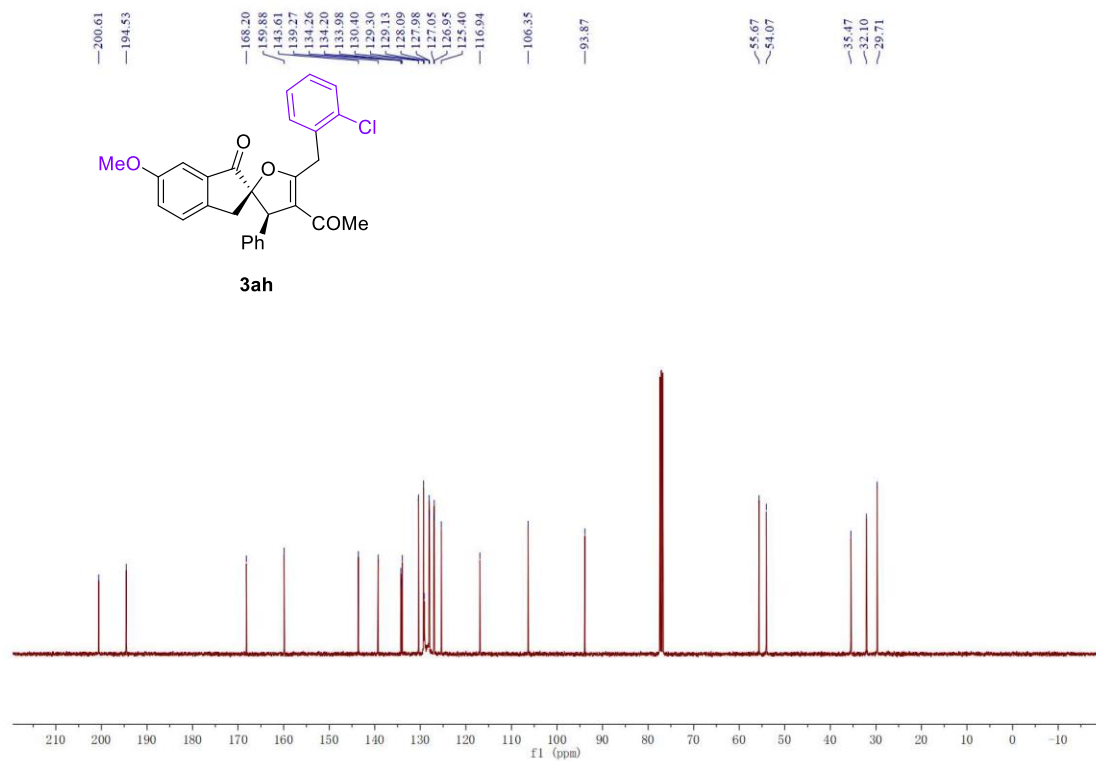



**<sup>1</sup>H NMR (400 MHz, CDCl<sub>3</sub>)**

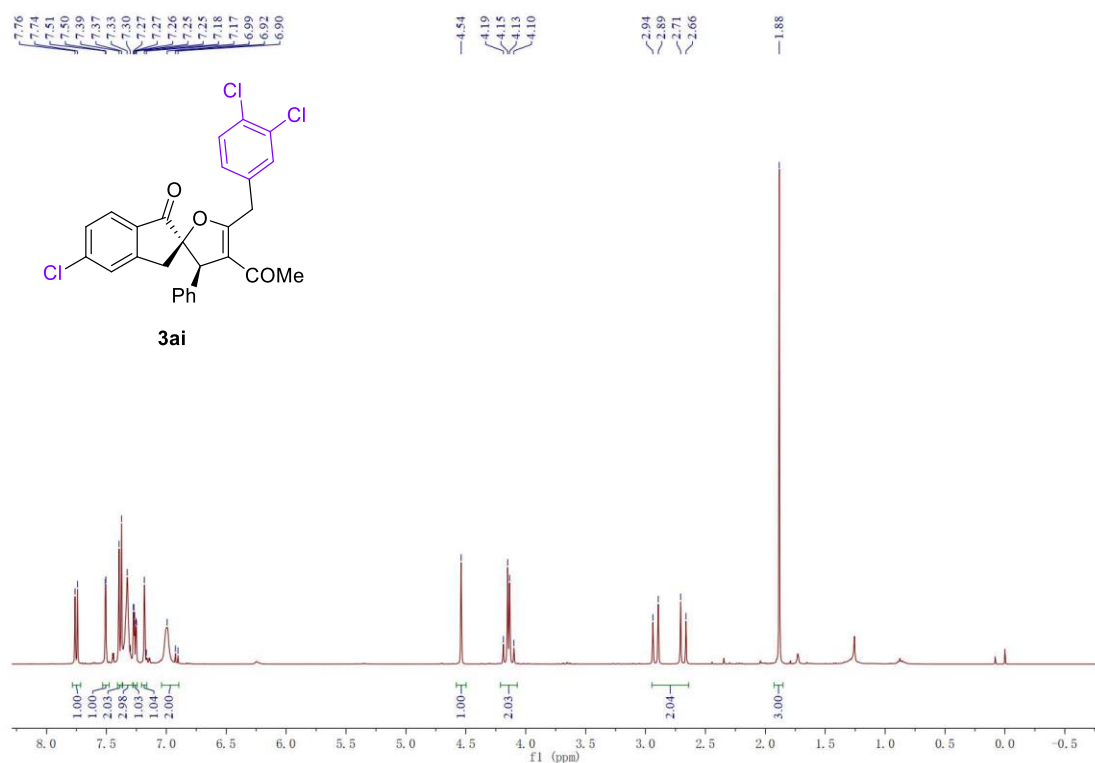

**<sup>13</sup>C NMR (101 MHz, CDCl<sub>3</sub>)**

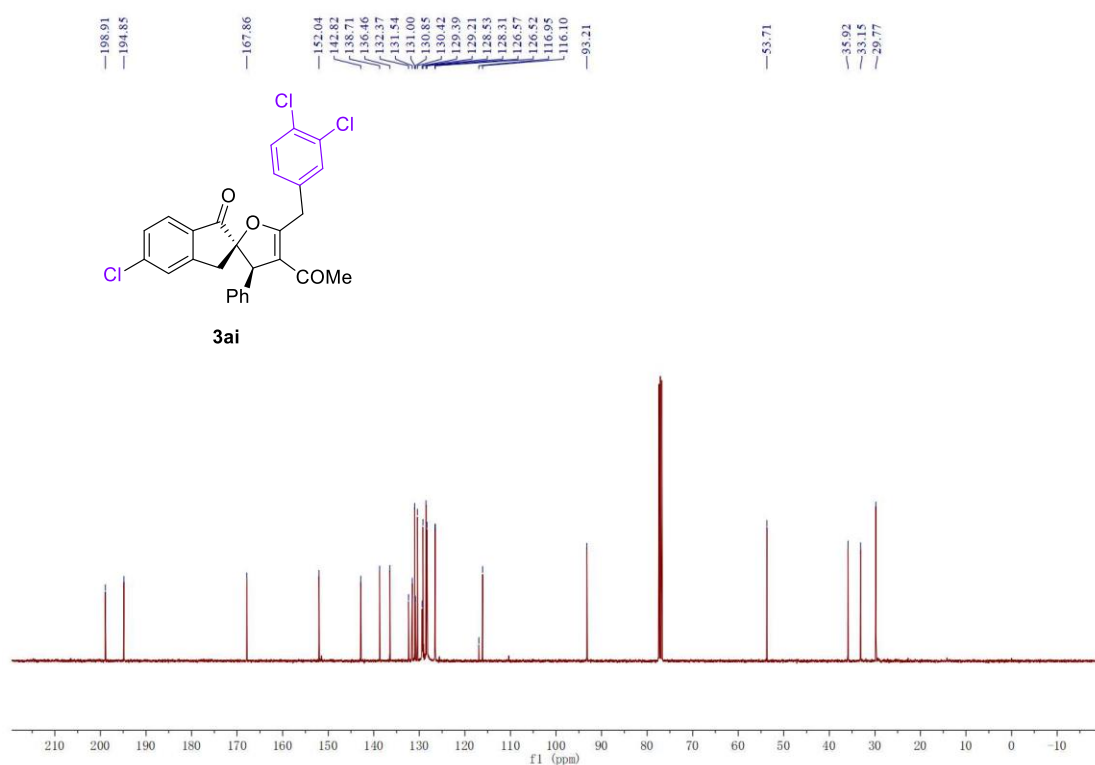

# <sup>1</sup>H NMR (400 MHz, CDCl<sub>3</sub>)

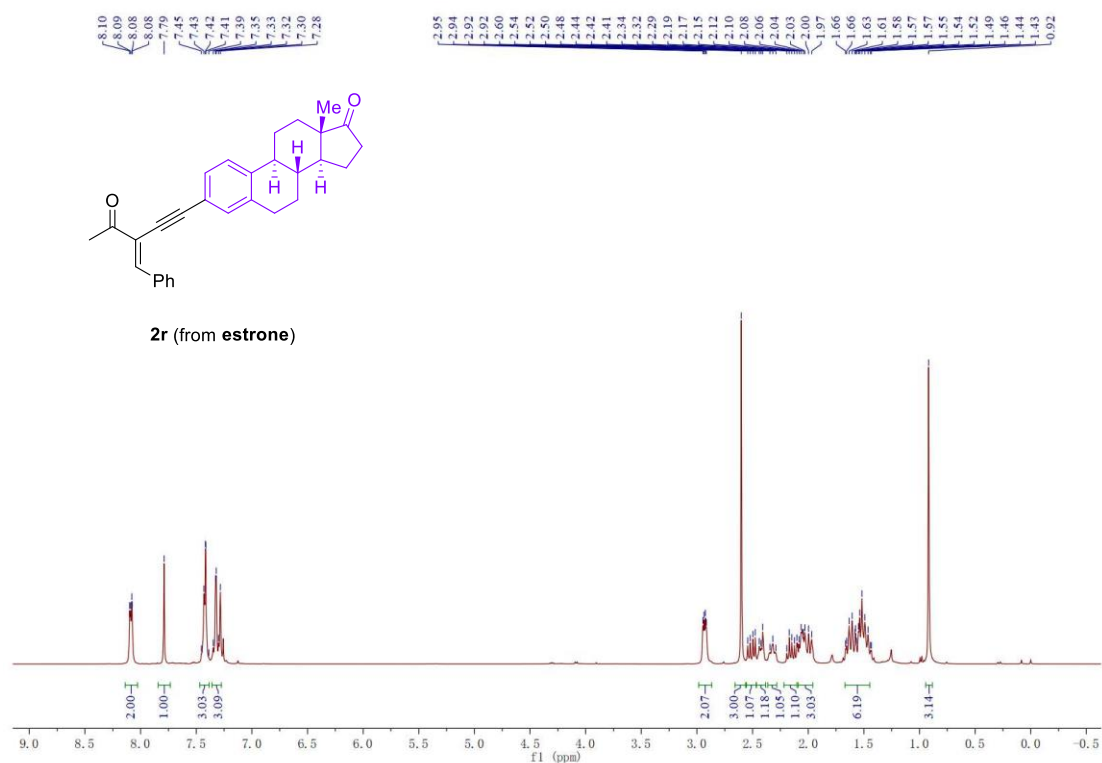

# <sup>13</sup>C NMR (101 MHz, CDCl<sub>3</sub>)

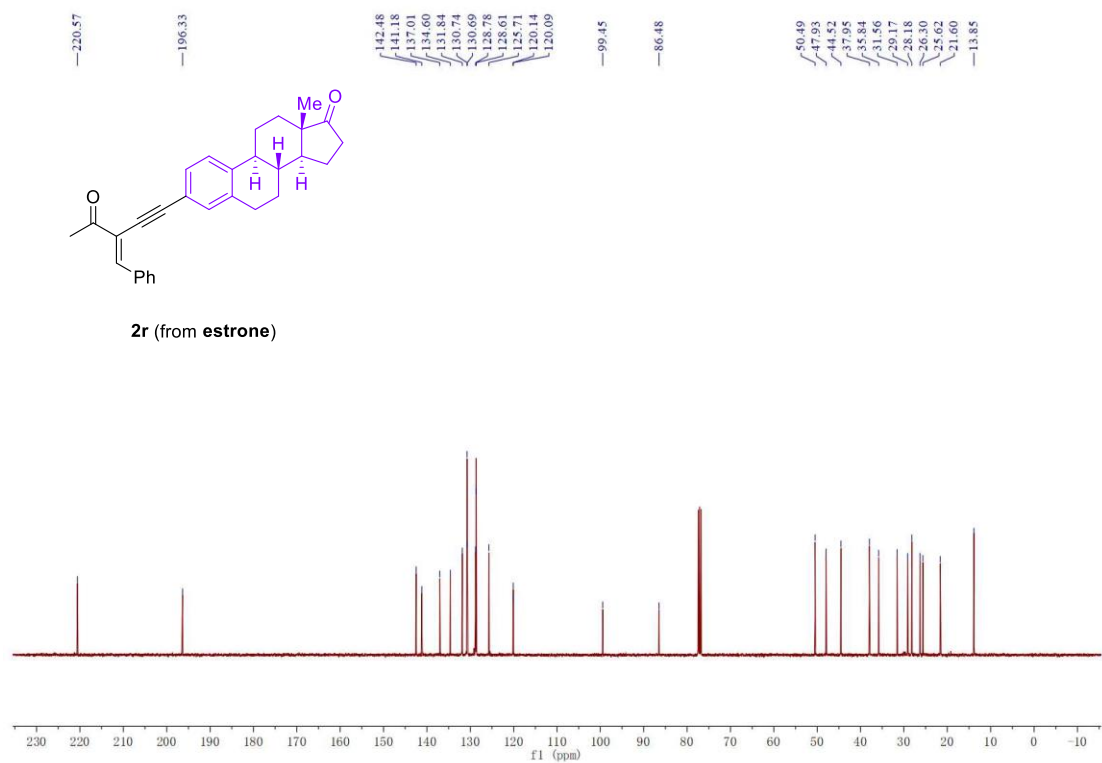

<sup>1</sup>H NMR (400 MHz, CDCl<sub>3</sub>)

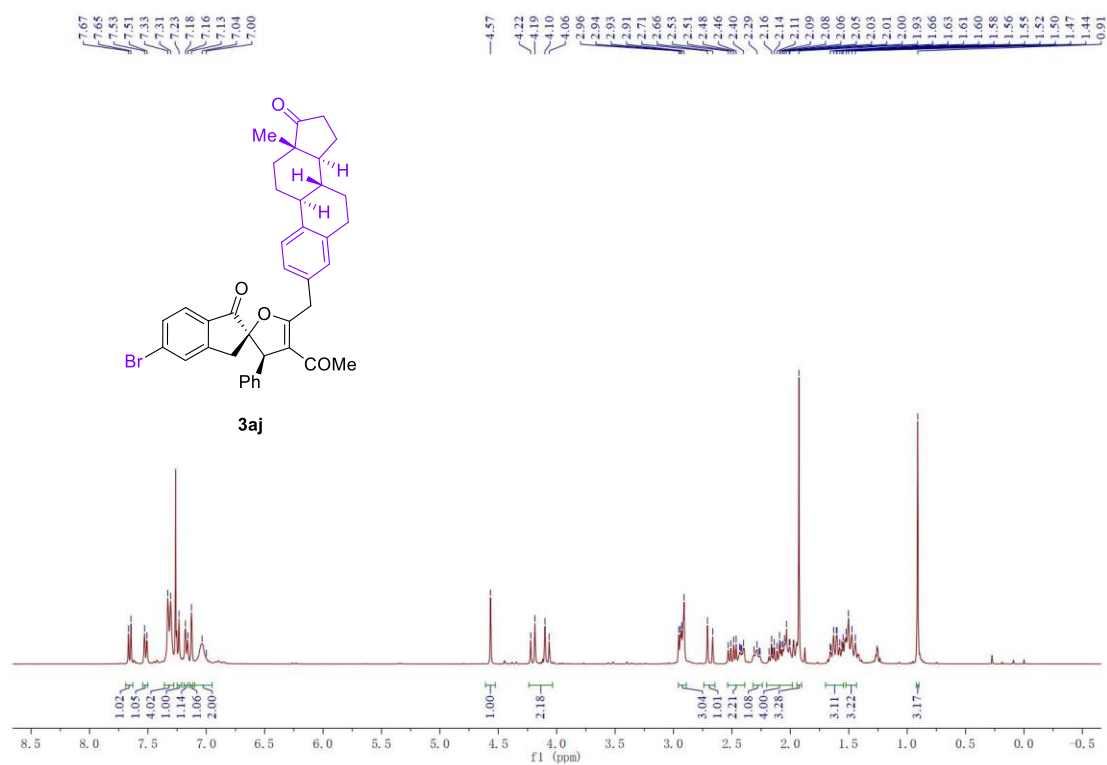

<sup>13</sup>C NMR (101 MHz, CDCl<sub>3</sub>)

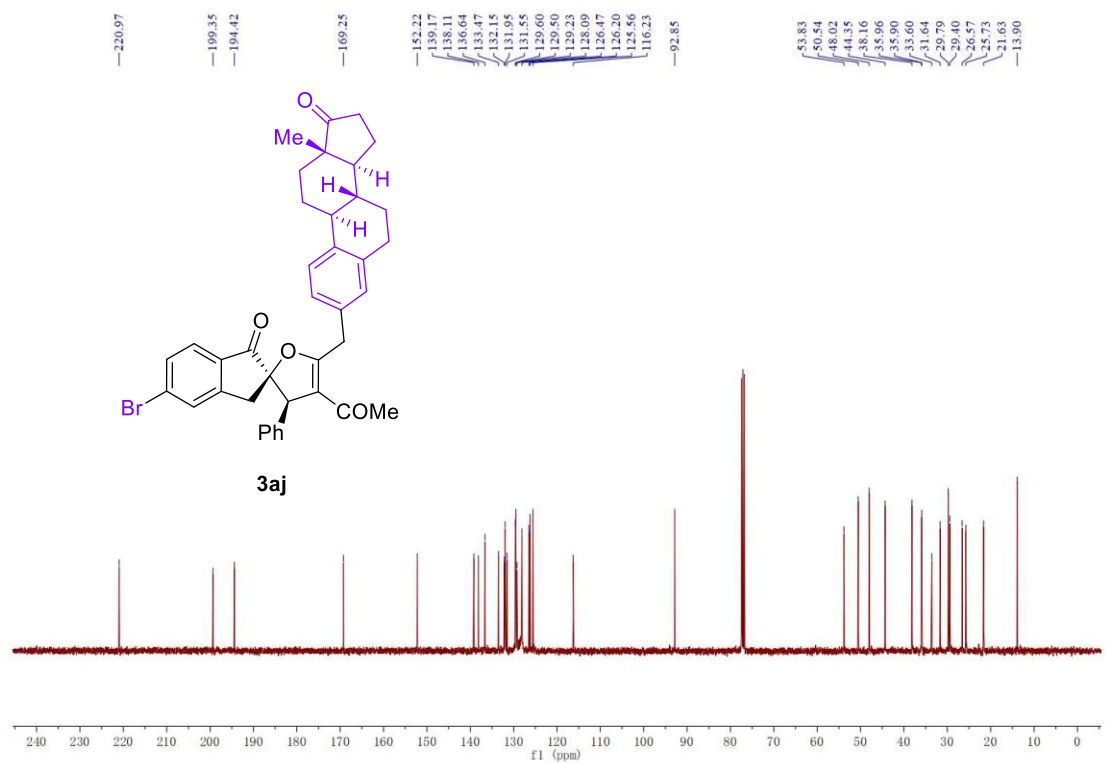

**<sup>1</sup>H NMR (400 MHz, CDCl<sub>3</sub>)**

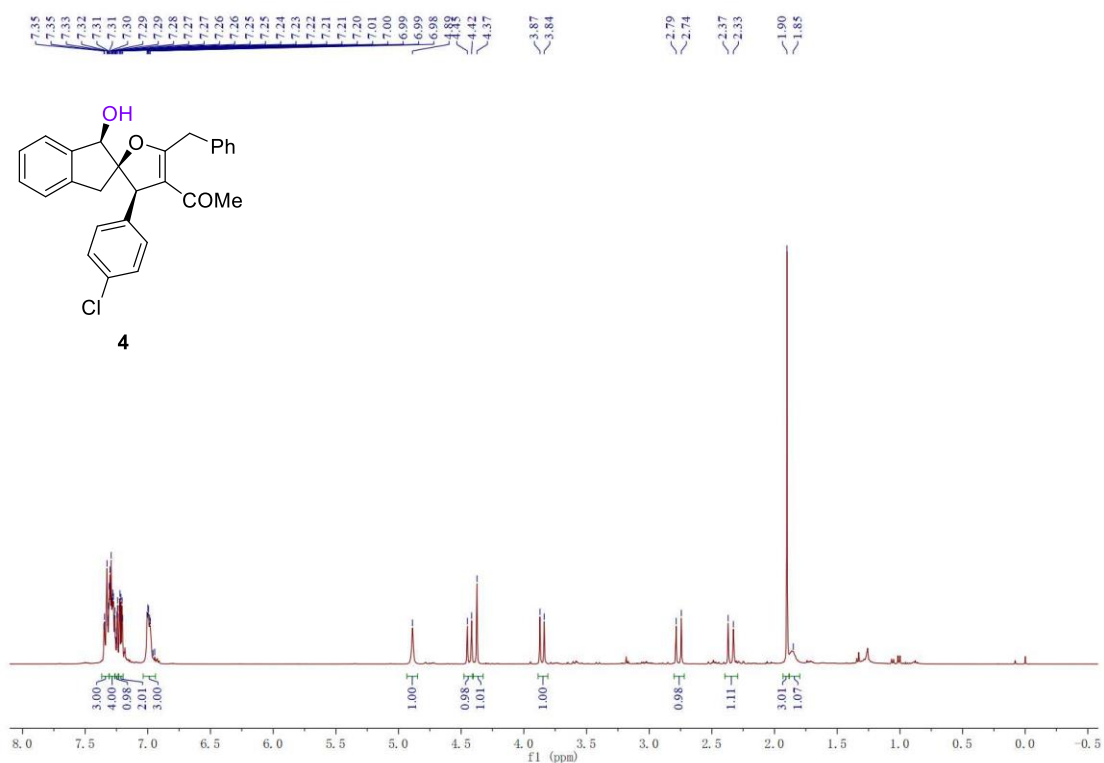

**<sup>13</sup>C NMR (101 MHz, CDCl<sub>3</sub>)**

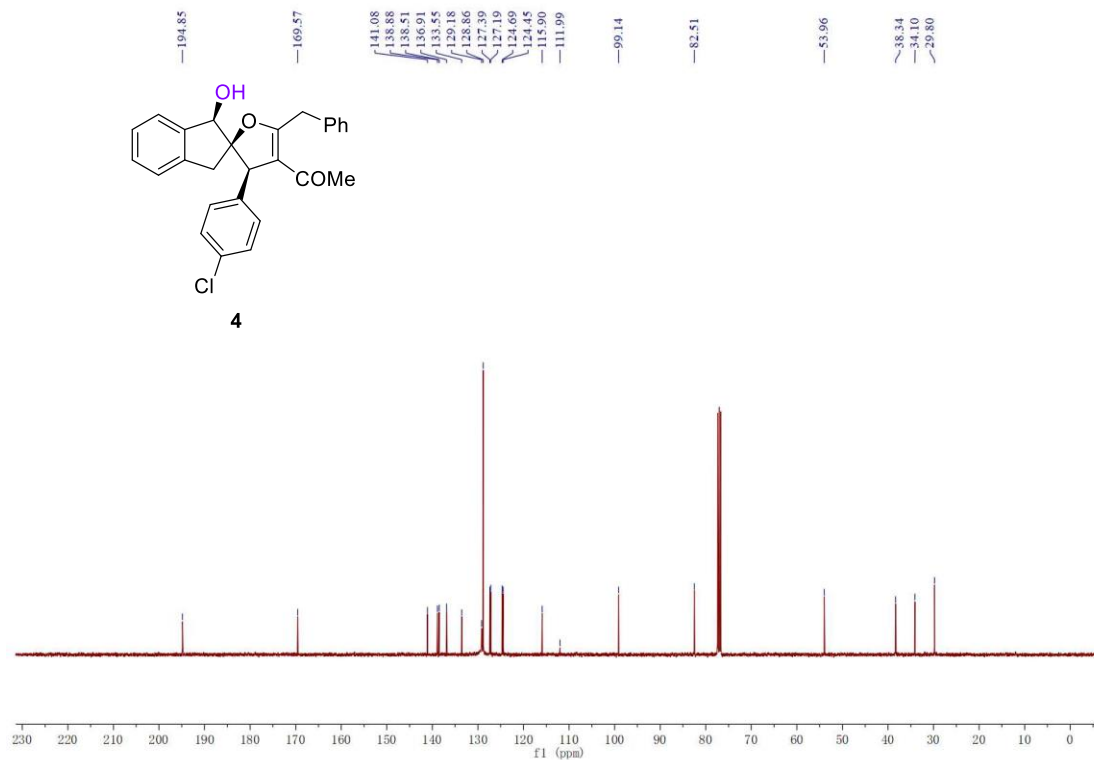

**<sup>1</sup>H NMR (400 MHz, CDCl<sub>3</sub>)**

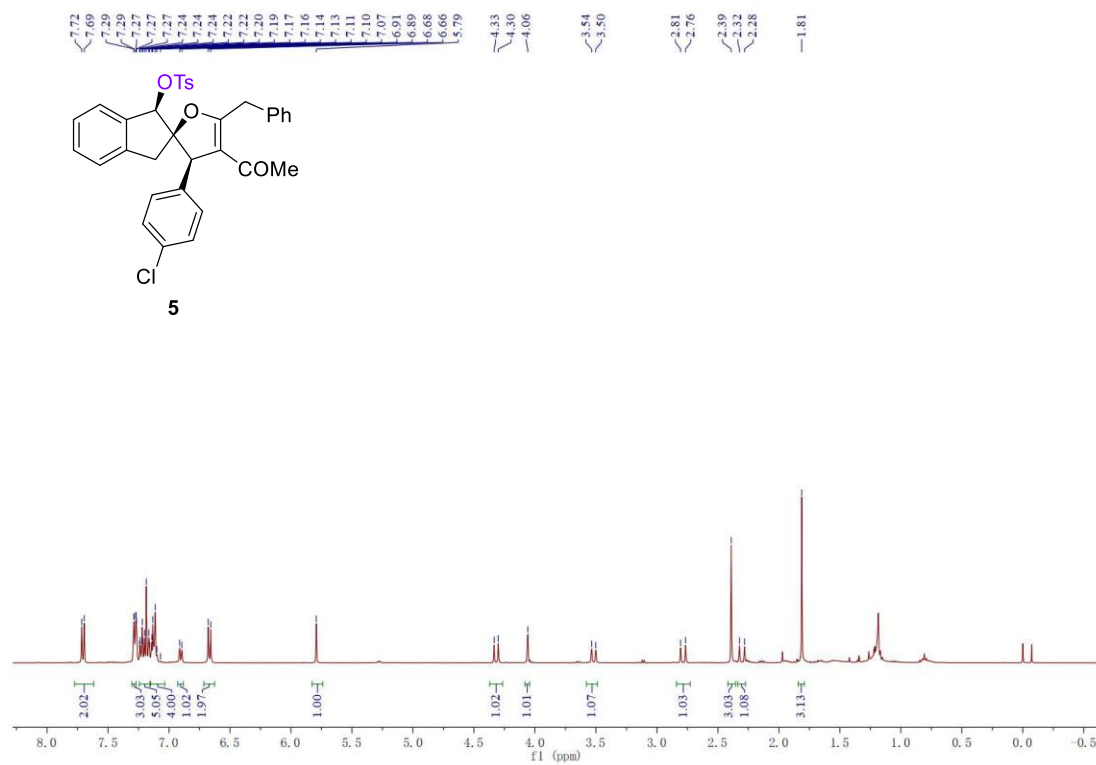

**<sup>13</sup>C NMR (101 MHz, CDCl<sub>3</sub>)**

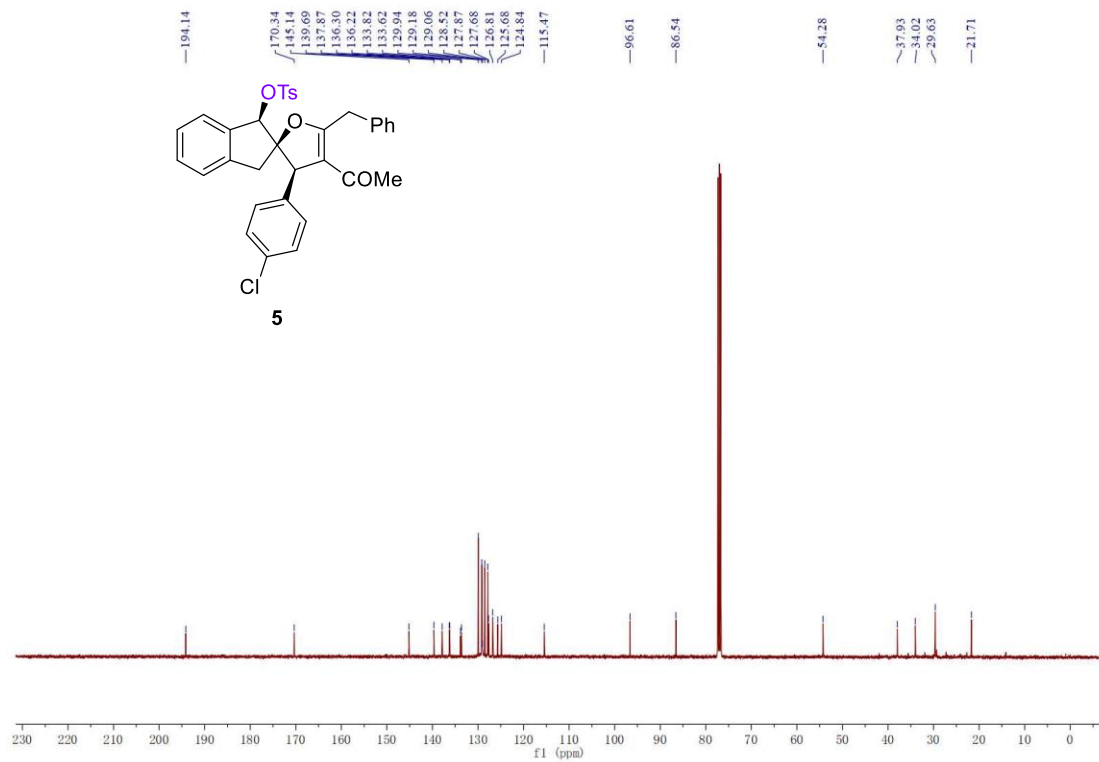

**<sup>1</sup>H NMR (400 MHz, CDCl<sub>3</sub>)**

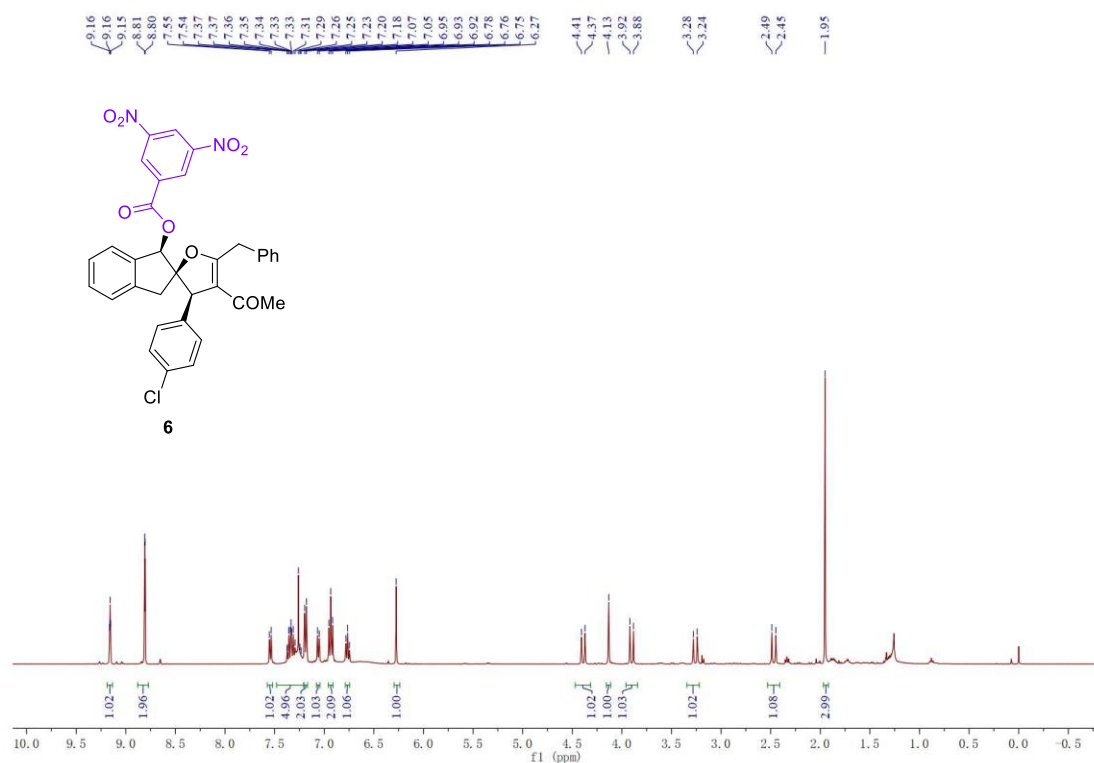

**<sup>13</sup>C NMR (101 MHz, CDCl<sub>3</sub>)**

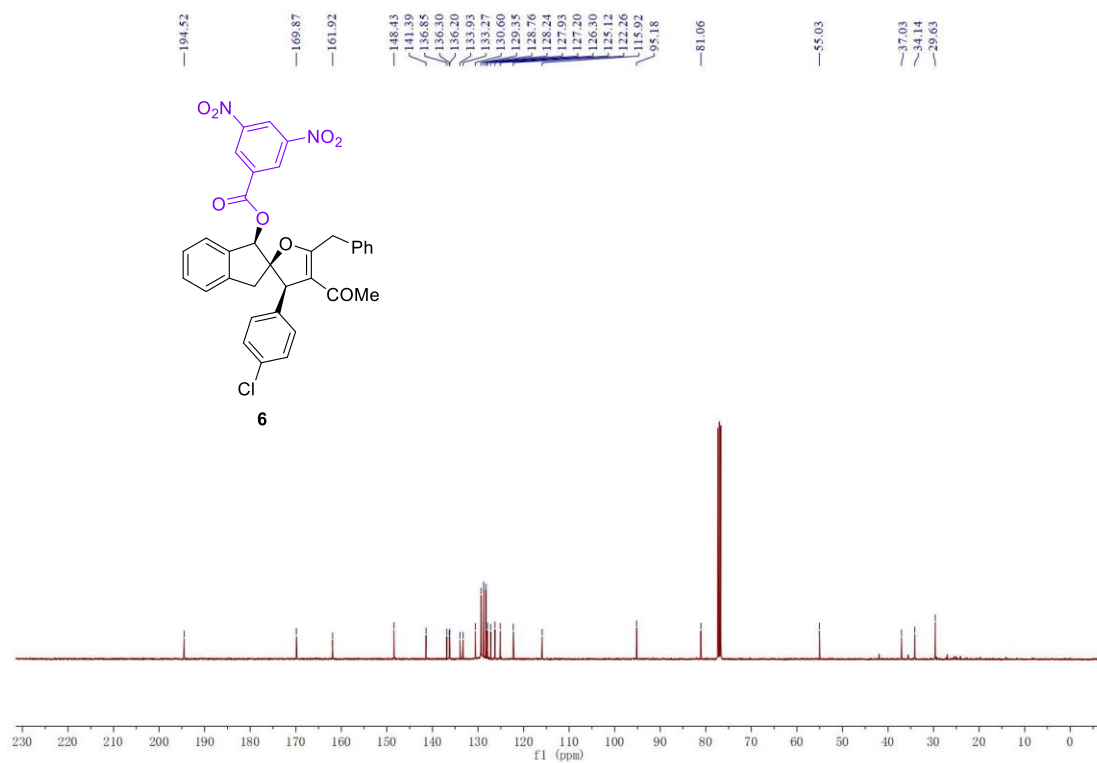

## HPLC spectra of compounds

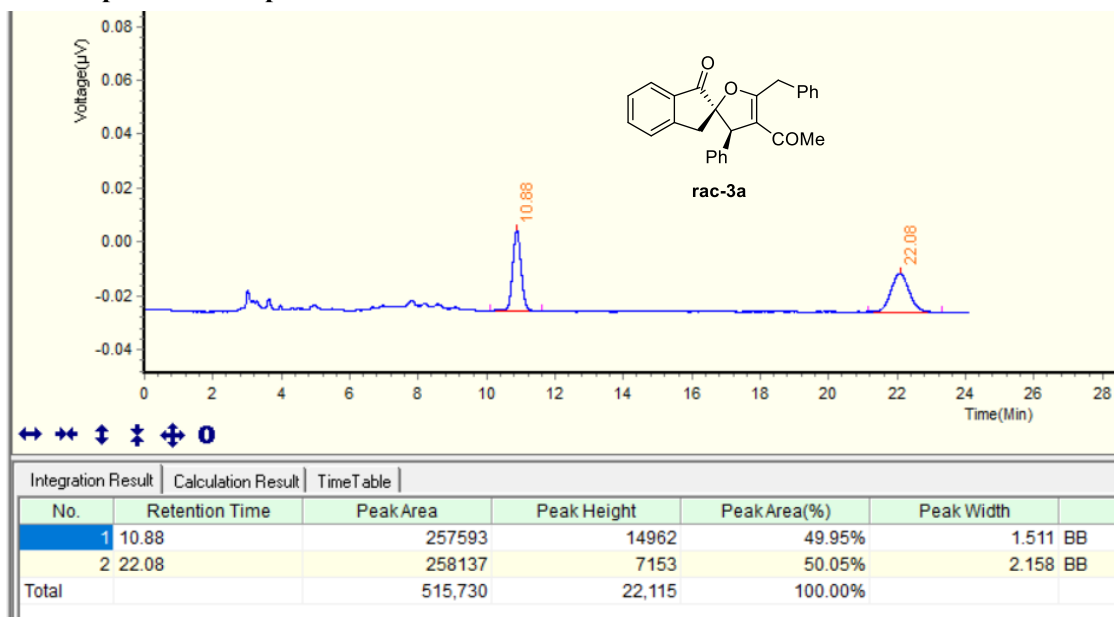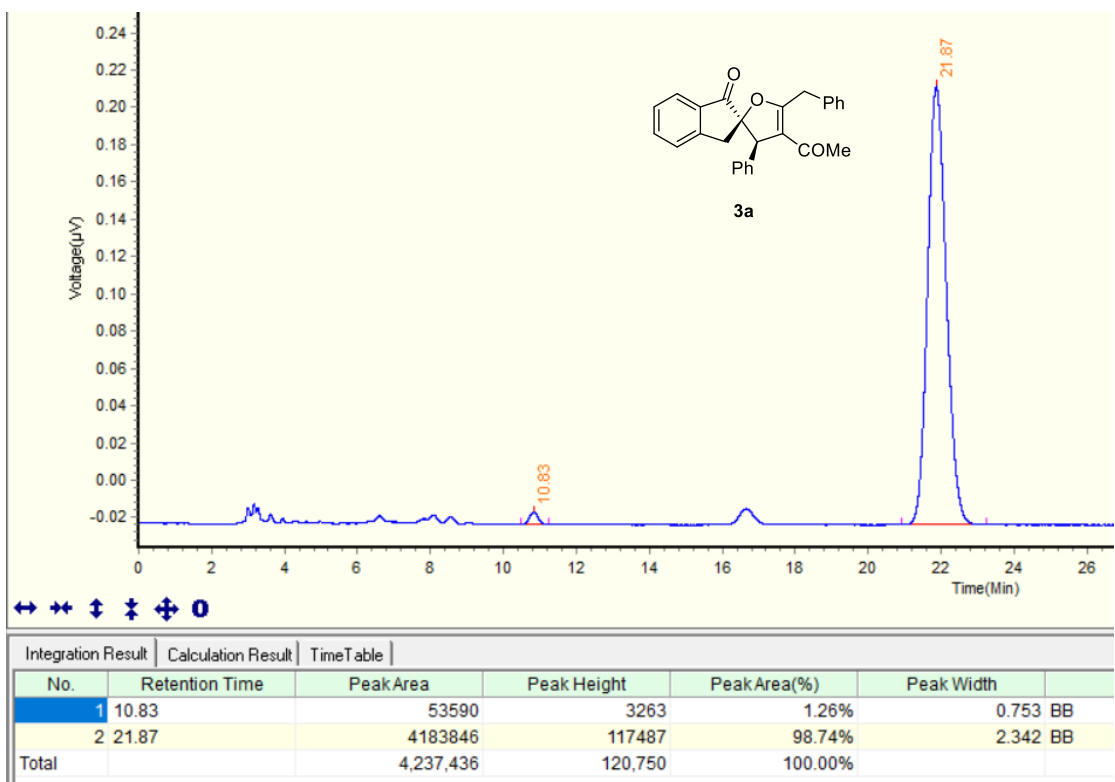

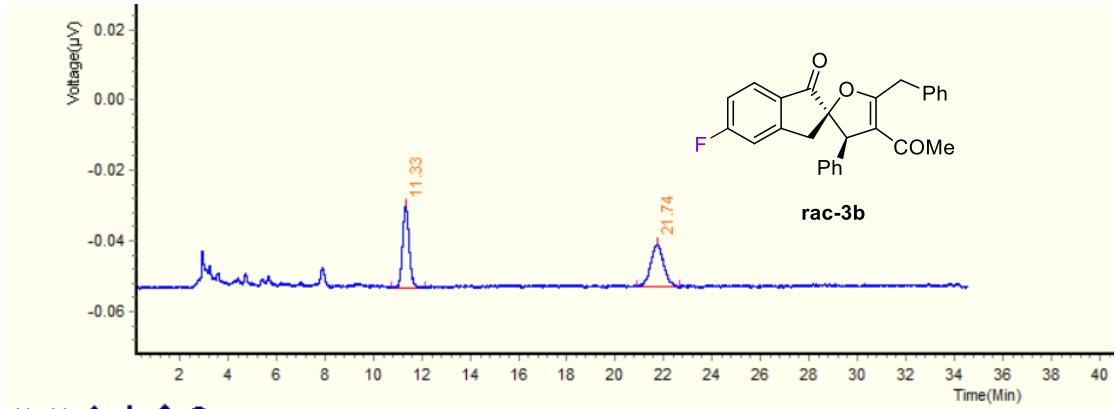

| No.   | Retention Time | Peak Area | Peak Height | Peak Area(%) | Peak Width |
|-------|----------------|-----------|-------------|--------------|------------|
| 1     | 11.33          | 220670    | 11694       | 49.97%       | 1.403 BB   |
| 2     | 21.74          | 220955    | 6073        | 50.03%       | 1.731 BB   |
| Total |                | 441,625   | 17,767      | 100.00%      |            |

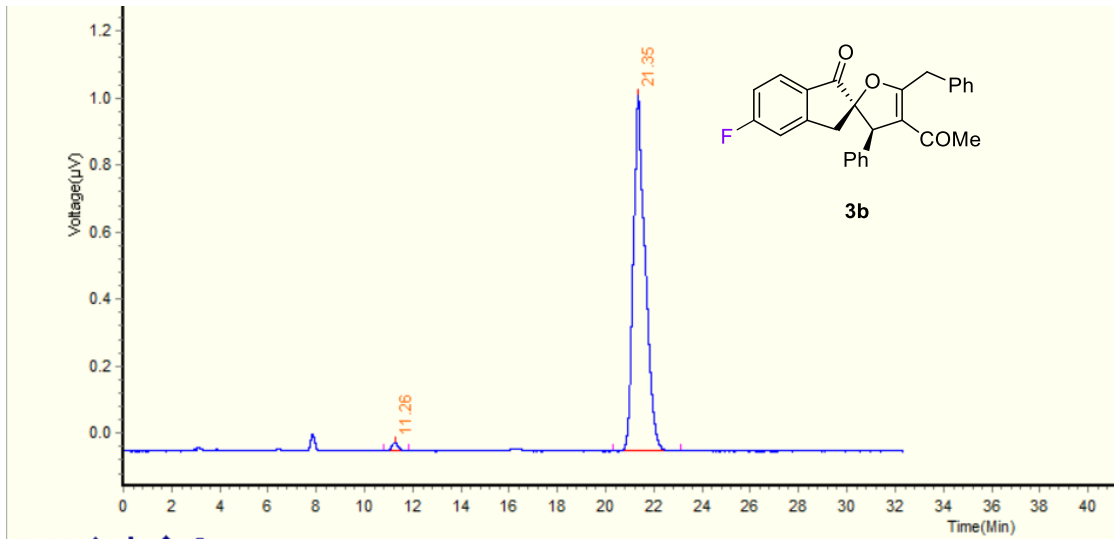

| No.   | Retention Time | Peak Area  | Peak Height | Peak Area(%) | Peak Width |
|-------|----------------|------------|-------------|--------------|------------|
| 1     | 11.26          | 239300     | 12591       | 1.31%        | 1.031 BB   |
| 2     | 21.35          | 18089617   | 530716      | 98.69%       | 2.825 BB   |
| Total |                | 18,328,917 | 543,307     | 100.00%      |            |



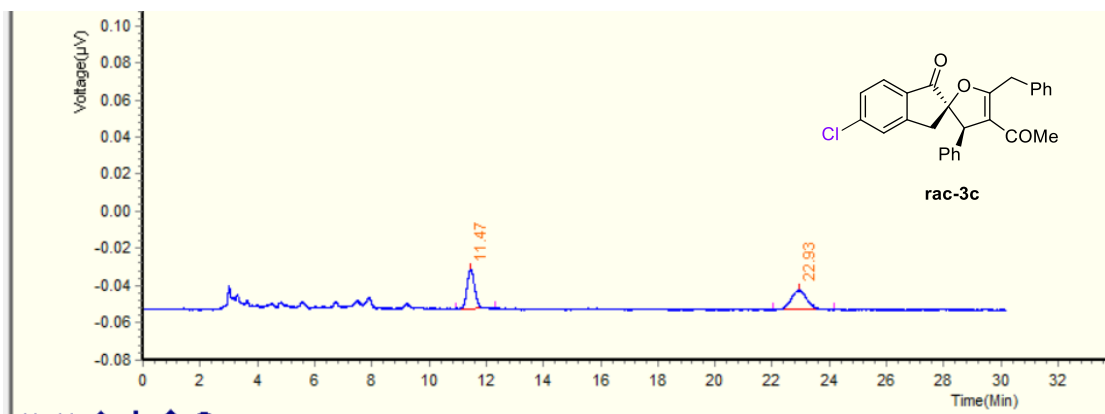

| Integration Result |                | Calculation Result |             | TimeTable    |            |
|--------------------|----------------|--------------------|-------------|--------------|------------|
| No.                | Retention Time | Peak Area          | Peak Height | Peak Area(%) | Peak Width |
| 1                  | 11.47          | 196105             | 10615       | 50.06%       | 1.344 BB   |
| 2                  | 22.93          | 195646             | 5122        | 49.94%       | 2.095 BB   |
| Total              |                | 391,751            | 15,737      | 100.00%      |            |

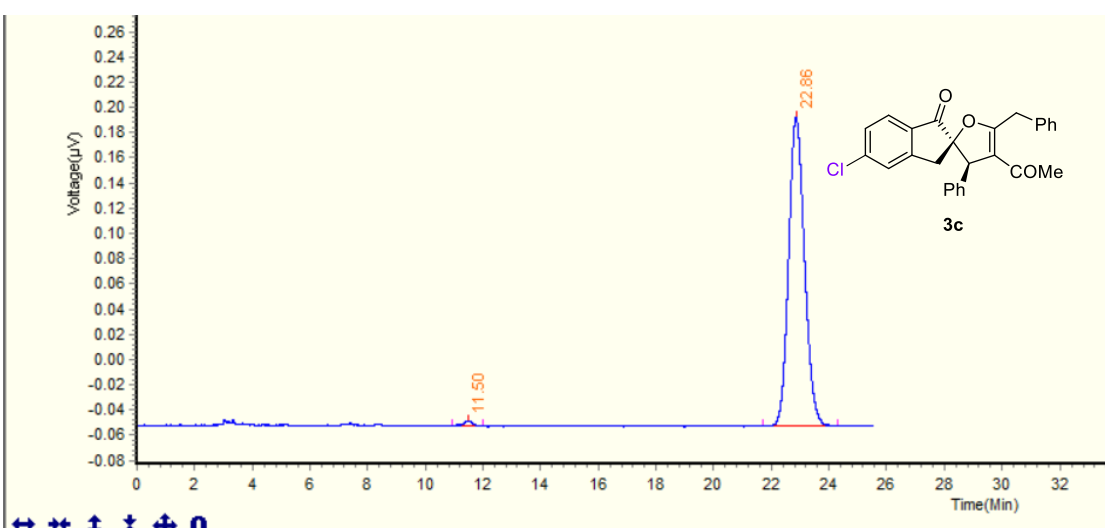

| Integration Result |                | Calculation Result |             | TimeTable    |            |
|--------------------|----------------|--------------------|-------------|--------------|------------|
| No.                | Retention Time | Peak Area          | Peak Height | Peak Area(%) | Peak Width |
| 1                  | 11.50          | 41528              | 2066        | 0.88%        | 1.058 BB   |
| 2                  | 22.86          | 4657260            | 122118      | 99.12%       | 2.593 BB   |
| Total              |                | 4,698,788          | 124,184     | 100.00%      |            |

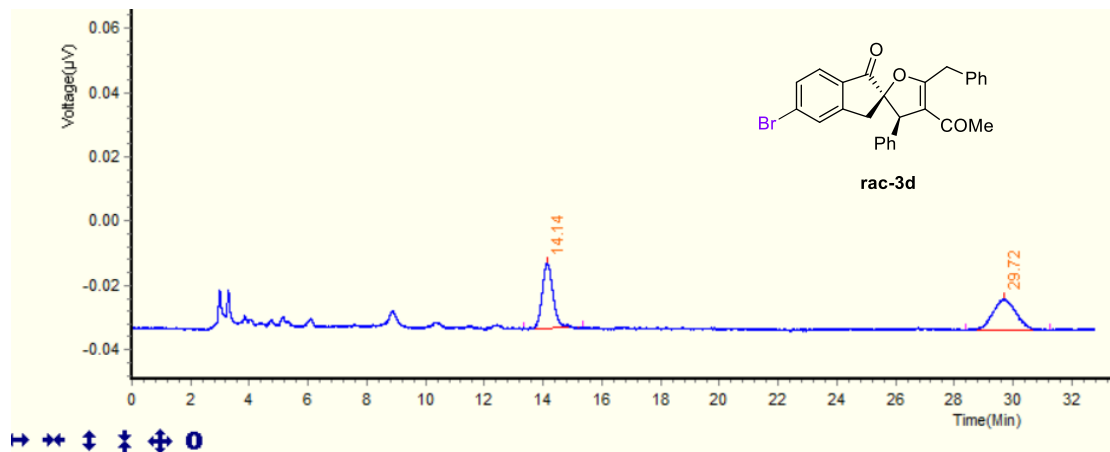

| Integration Result |                | Calculation Result |             | TimeTable   |            |
|--------------------|----------------|--------------------|-------------|-------------|------------|
| No.                | Retention Time | PeakArea           | Peak Height | PeakArea(%) | Peak Width |
| 1                  | 14.14          | 262778             | 10139       | 49.99%      | 2.038 BB   |
| 2                  | 29.72          | 262836             | 4767        | 50.01%      | 2.887 BB   |
| Total              |                | 525,614            | 14,906      | 100.00%     |            |

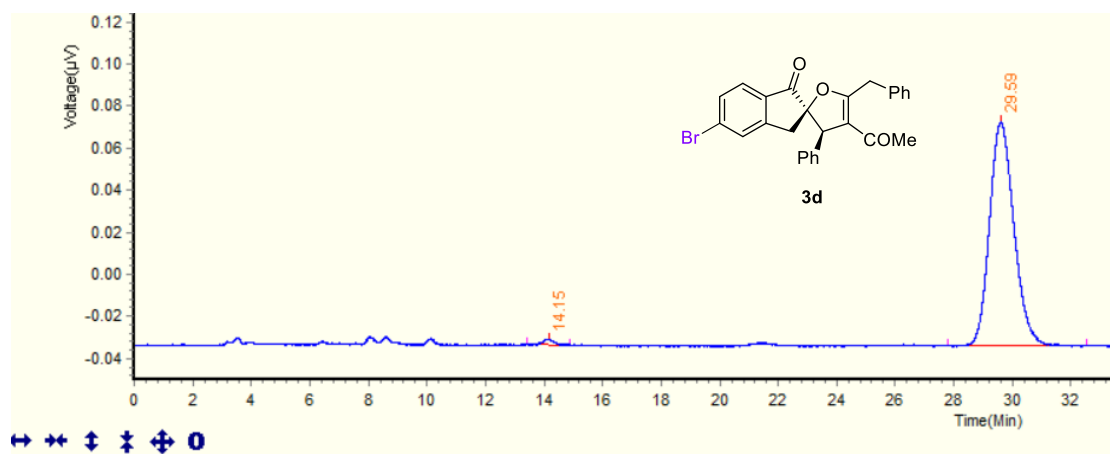

| Integration Result |                | Calculation Result |             | TimeTable   |            |
|--------------------|----------------|--------------------|-------------|-------------|------------|
| No.                | Retention Time | PeakArea           | Peak Height | PeakArea(%) | Peak Width |
| 1                  | 14.15          | 31829              | 1397        | 1.03%       | 1.423 BB   |
| 2                  | 29.59          | 3066218            | 53087       | 98.97%      | 4.752 BB   |
| Total              |                | 3,098,047          | 54,484      | 100.00%     |            |

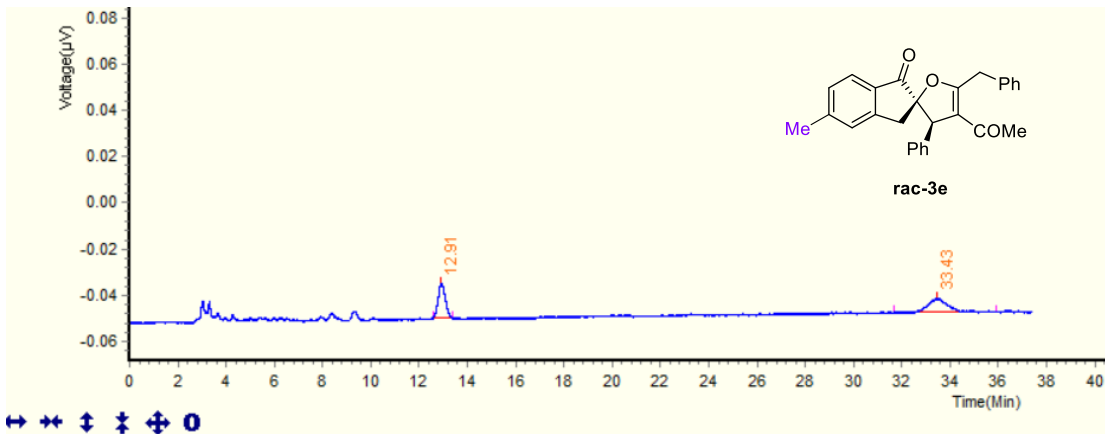

| No.   | Retention Time | Peak Area | Peak Height | Peak Area(%) | Peak Width |
|-------|----------------|-----------|-------------|--------------|------------|
| 1     | 12.91          | 154095    | 7554        | 50.01%       | 0.807 BB   |
| 2     | 33.43          | 154013    | 2885        | 49.99%       | 4.224 BB   |
| Total |                | 308,108   | 10,439      | 100.00%      |            |

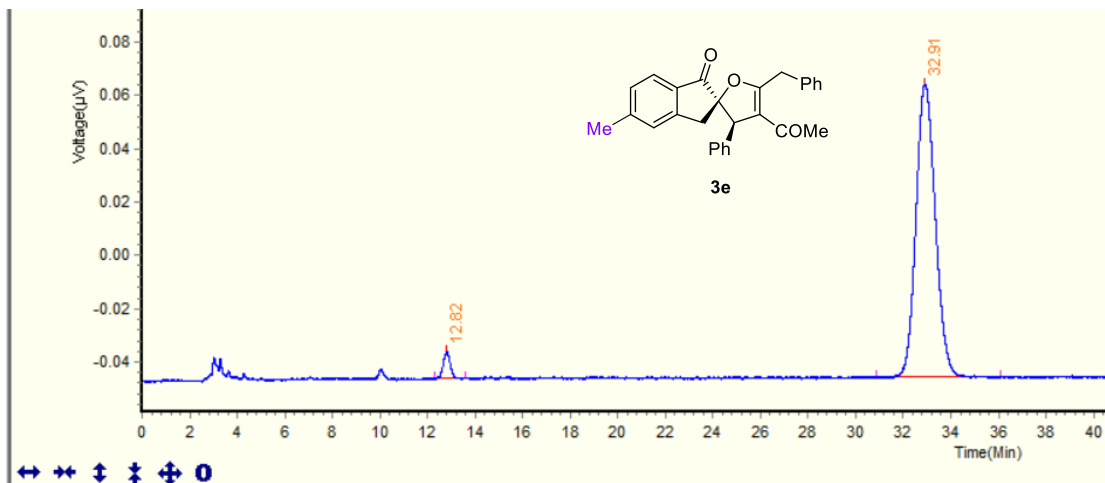

| No.   | Retention Time | Peak Area | Peak Height | Peak Area(%) | Peak Width |
|-------|----------------|-----------|-------------|--------------|------------|
| 1     | 12.82          | 98944     | 4906        | 3.10%        | 1.295 BB   |
| 2     | 32.91          | 3097432   | 54892       | 96.90%       | 5.237 BB   |
| Total |                | 3,196,376 | 59,798      | 100.00%      |            |

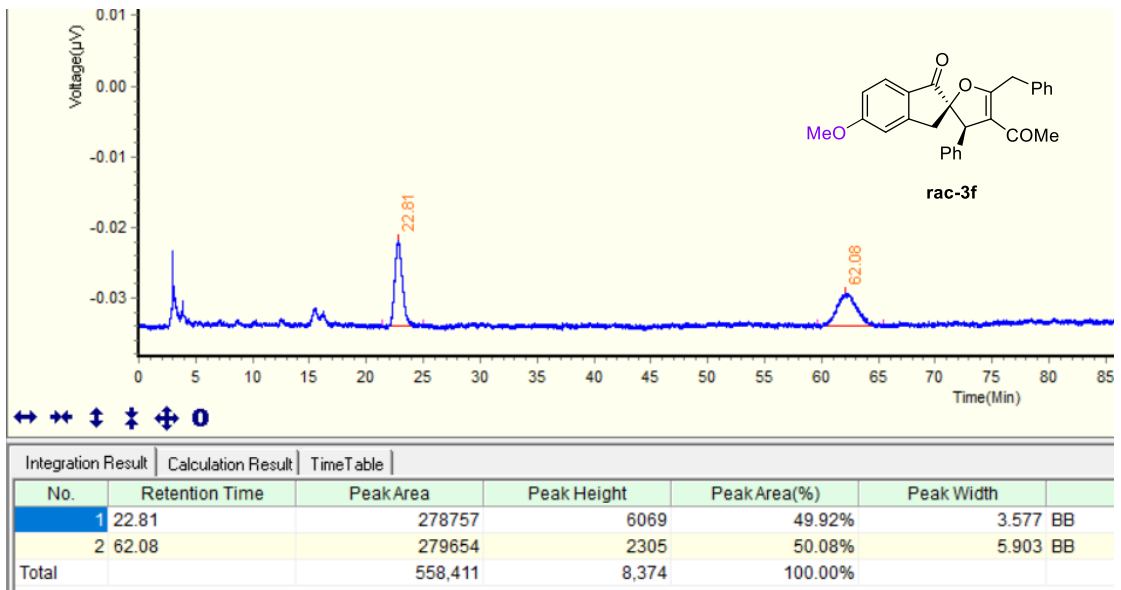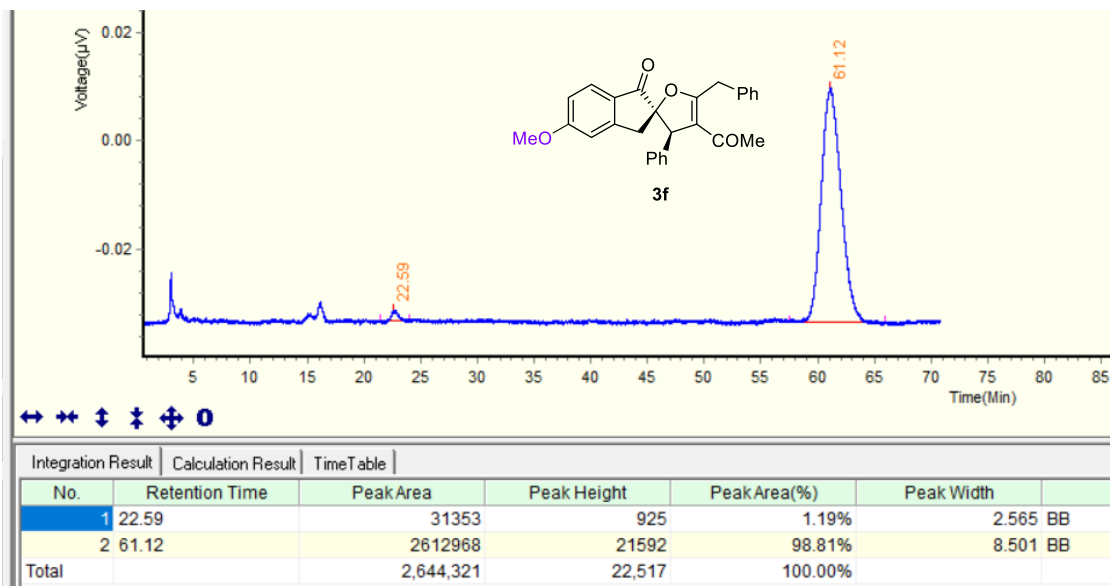

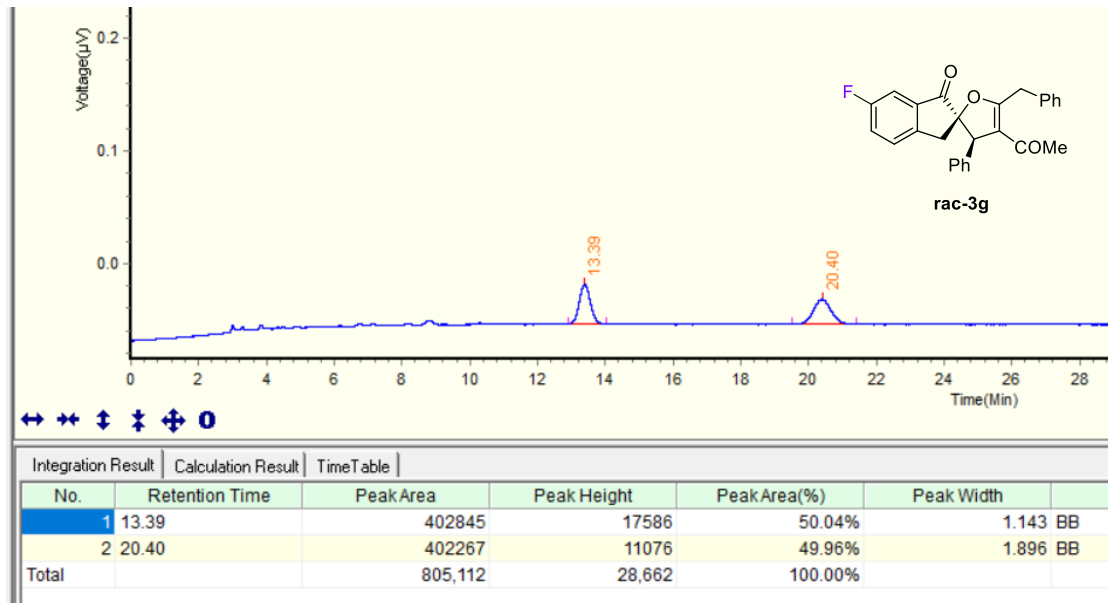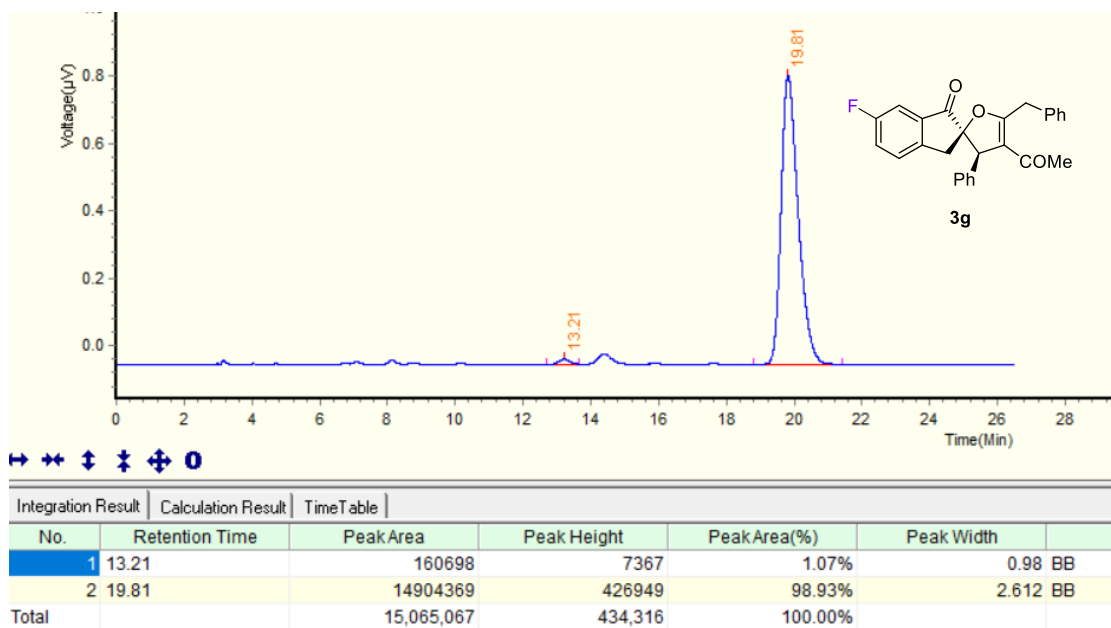

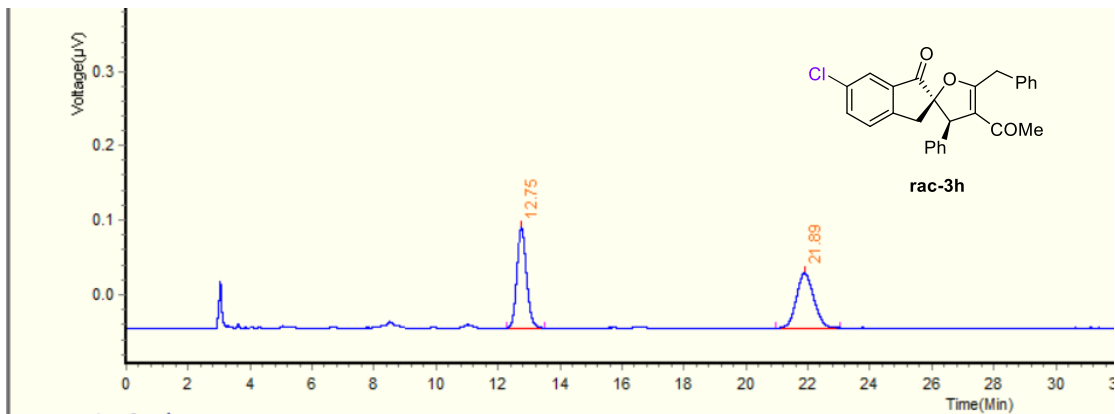

← \* ↑ ↓ ⊕ ⊖

| No.   | Retention Time | PeakArea  | Peak Height | PeakArea(%) | Peak Width |
|-------|----------------|-----------|-------------|-------------|------------|
| 1     | 12.75          | 1440607   | 67495       | 50.09%      | 1.225 BB   |
| 2     | 21.89          | 1435399   | 36963       | 49.91%      | 2.105 BB   |
| Total |                | 2,876,006 | 104,458     | 100.00%     |            |

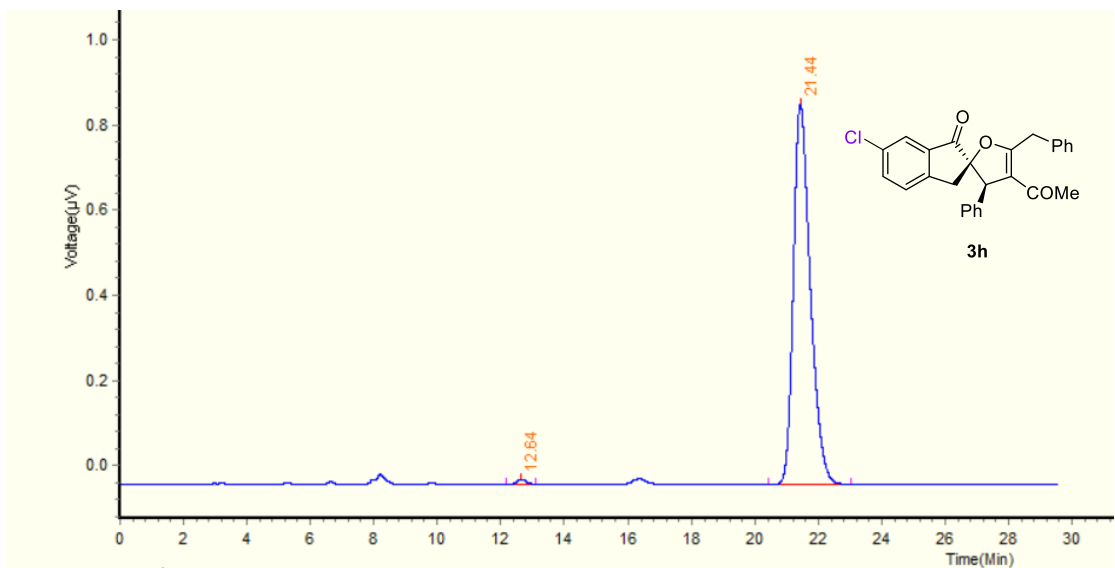

← \* ↑ ↓ ⊕ ⊖

| No.   | Retention Time | PeakArea   | Peak Height | PeakArea(%) | Peak Width |
|-------|----------------|------------|-------------|-------------|------------|
| 1     | 12.64          | 119243     | 5802        | 0.72%       | 0.943 BB   |
| 2     | 21.44          | 16498025   | 446210      | 99.28%      | 2.583 BB   |
| Total |                | 16,617,268 | 452,012     | 100.00%     |            |

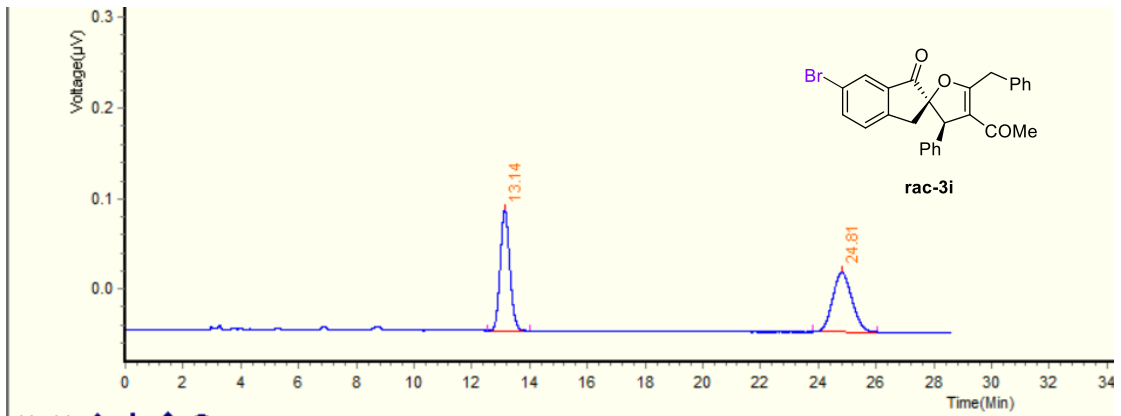

| No.   | Retention Time | Peak Area | Peak Height | Peak Area(%) | Peak Width |
|-------|----------------|-----------|-------------|--------------|------------|
| 1     | 13.14          | 1539873   | 66719       | 50.05%       | 1.474 BB   |
| 2     | 24.81          | 1536513   | 33017       | 49.95%       | 2.241 BB   |
| Total |                | 3,076,386 | 99,736      | 100.00%      |            |

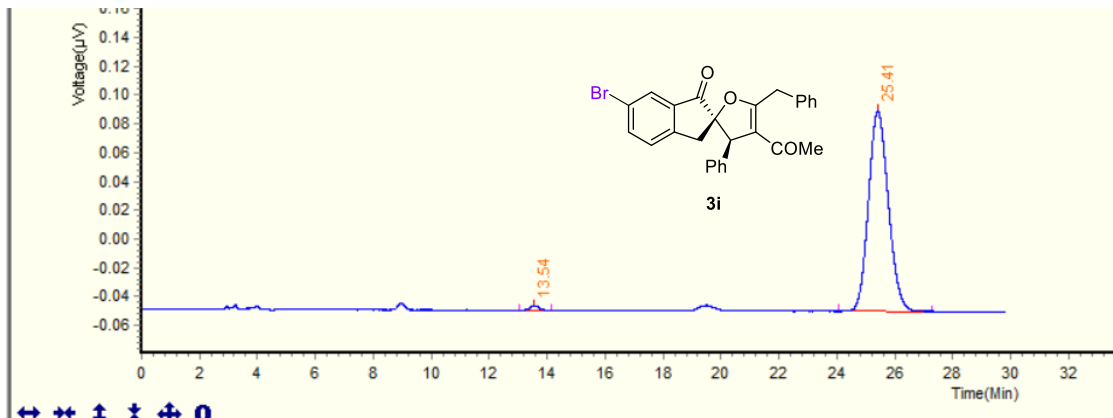

| No.   | Retention Time | Peak Area | Peak Height | Peak Area(%) | Peak Width |
|-------|----------------|-----------|-------------|--------------|------------|
| 1     | 13.54          | 37209     | 1544        | 1.11%        | 1.113 BB   |
| 2     | 25.41          | 3312631   | 69577       | 98.89%       | 3.183 BB   |
| Total |                | 3,349,840 | 71,121      | 100.00%      |            |

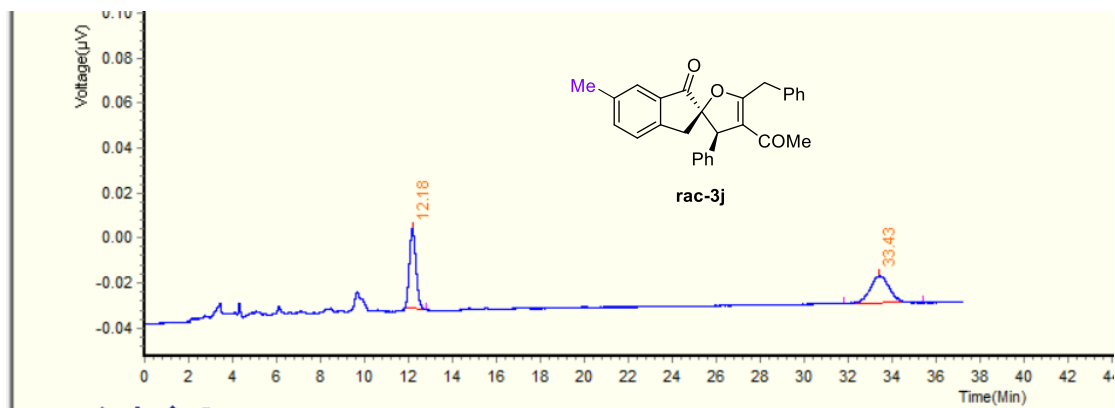

← → ↑ ↓ ⊕ ⊖

| Integration Result |                | Calculation Result |             | TimeTable    |            |
|--------------------|----------------|--------------------|-------------|--------------|------------|
| No.                | Retention Time | Peak Area          | Peak Height | Peak Area(%) | Peak Width |
| 1                  | 12.18          | 366719             | 17736       | 50.17%       | 0.927 BB   |
| 2                  | 33.43          | 364258             | 5990        | 49.83%       | 3.589 BB   |
| Total              |                | 730,977            | 23,726      | 100.00%      |            |

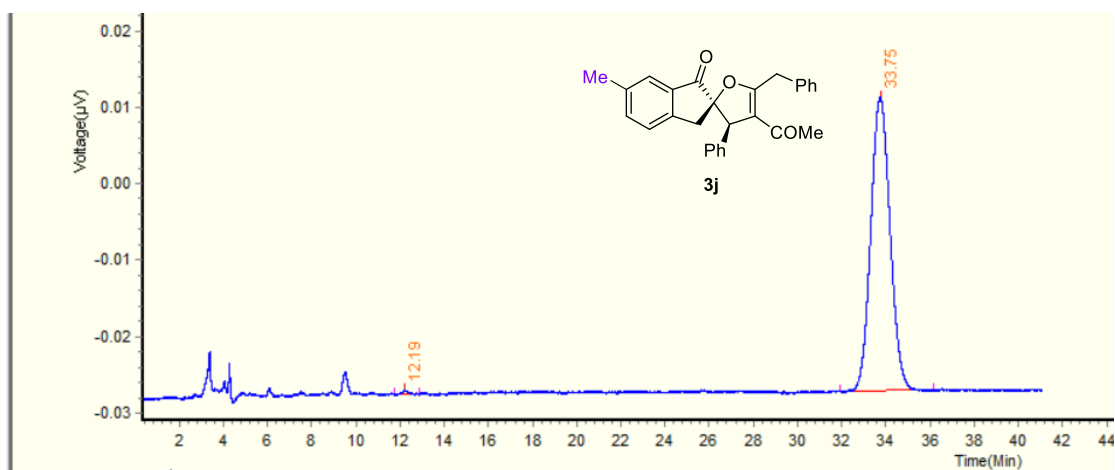

← → ↑ ↓ ⊕ ⊖

| Integration Result |                | Calculation Result |             | TimeTable    |            |
|--------------------|----------------|--------------------|-------------|--------------|------------|
| No.                | Retention Time | Peak Area          | Peak Height | Peak Area(%) | Peak Width |
| 1                  | 12.19          | 2769               | 241         | 0.24%        | 1.155 BB   |
| 2                  | 33.75          | 116557             | 19232       | 99.76%       | 4.233 BB   |
| Total              |                | 1,168,326          | 19,473      | 100.00%      |            |



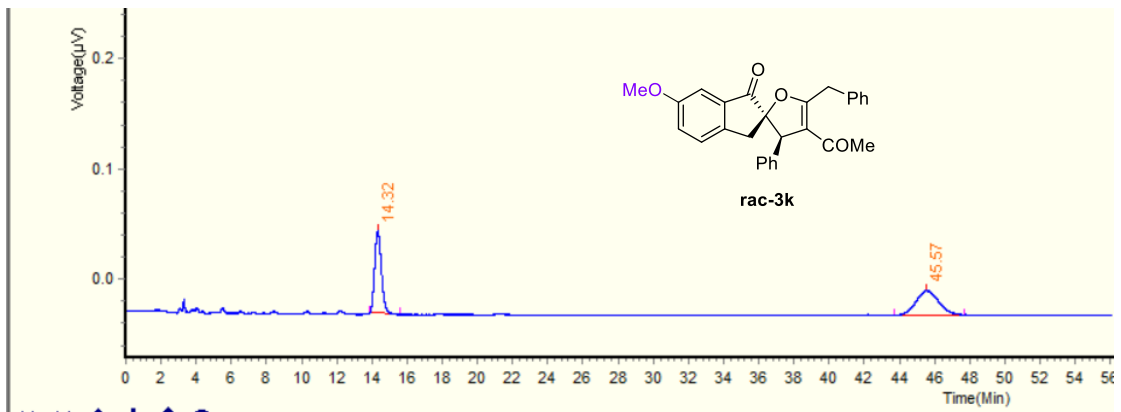

← → ↑ ↓ ⊕ ⊖

| No.   | Retention Time | Peak Area | Peak Height | Peak Area(%) | Peak Width |
|-------|----------------|-----------|-------------|--------------|------------|
| 1     | 14.32          | 981253    | 36892       | 49.95%       | 1.743 BB   |
| 2     | 45.57          | 983053    | 11050       | 50.05%       | 3.95 BB    |
| Total |                | 1,964,306 | 47,942      | 100.00%      |            |

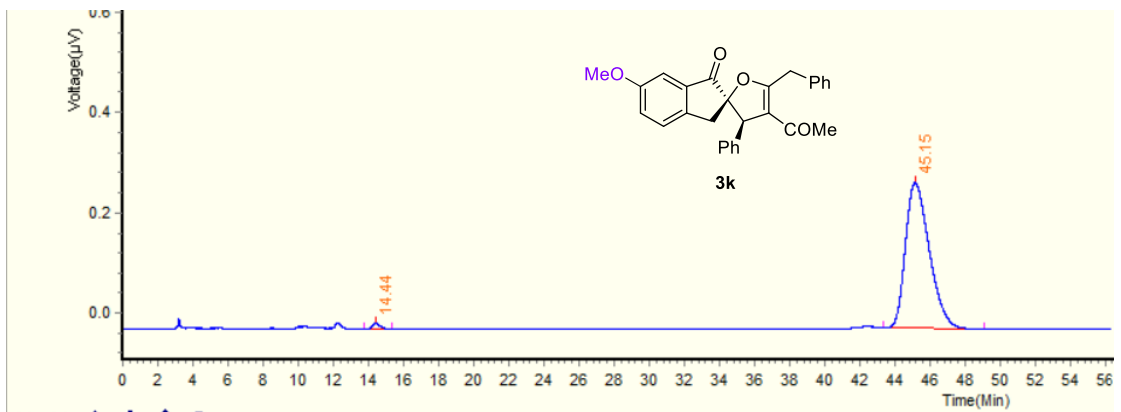

← → ↑ ↓ ⊕ ⊖

| No.   | Retention Time | Peak Area  | Peak Height | Peak Area(%) | Peak Width |
|-------|----------------|------------|-------------|--------------|------------|
| 1     | 14.44          | 156364     | 5592        | 1.12%        | 1.634 BB   |
| 2     | 45.15          | 13760880   | 145949      | 98.88%       | 5.778 BB   |
| Total |                | 13,917,244 | 151,541     | 100.00%      |            |

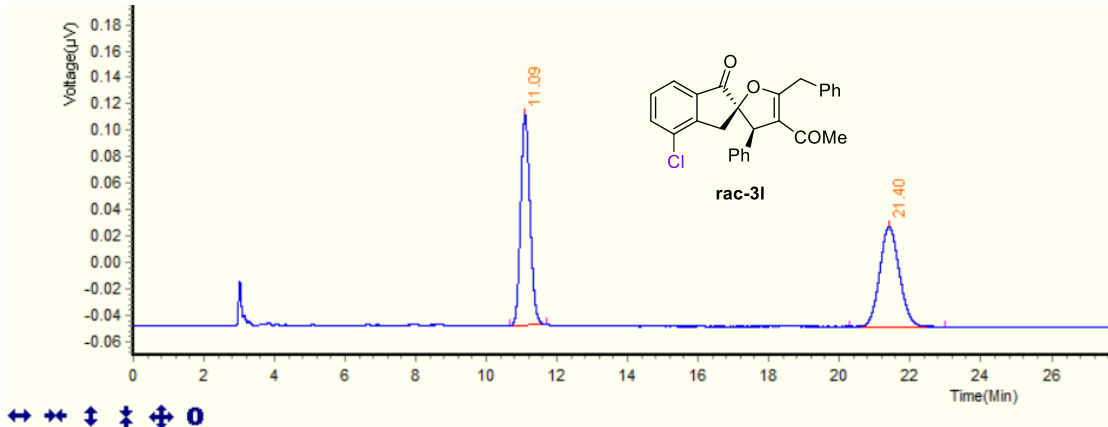

| No.   | Retention Time | Peak Area | Peak Height | Peak Area(%) | Peak Width |
|-------|----------------|-----------|-------------|--------------|------------|
| 1     | 11.09          | 1471510   | 79699       | 50.23%       | 1.041 BB   |
| 2     | 21.40          | 1458291   | 37894       | 49.77%       | 2.718 BB   |
| Total |                | 2,929,801 | 117,593     | 100.00%      |            |

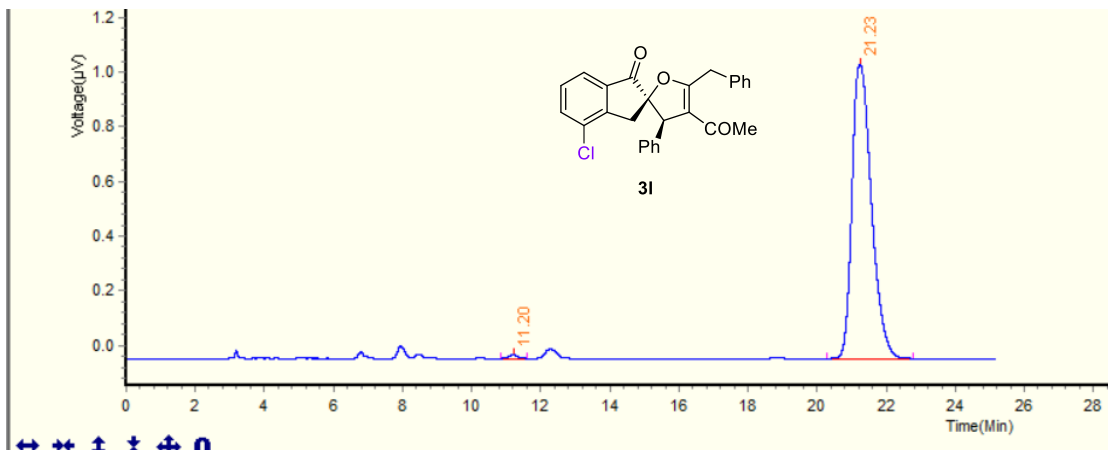

| No.   | Retention Time | Peak Area  | Peak Height | Peak Area(%) | Peak Width |
|-------|----------------|------------|-------------|--------------|------------|
| 1     | 11.20          | 121050     | 6720        | 0.57%        | 0.75 BB    |
| 2     | 21.23          | 21024995   | 539365      | 99.43%       | 2.509 BB   |
| Total |                | 21,146,045 | 546,085     | 100.00%      |            |

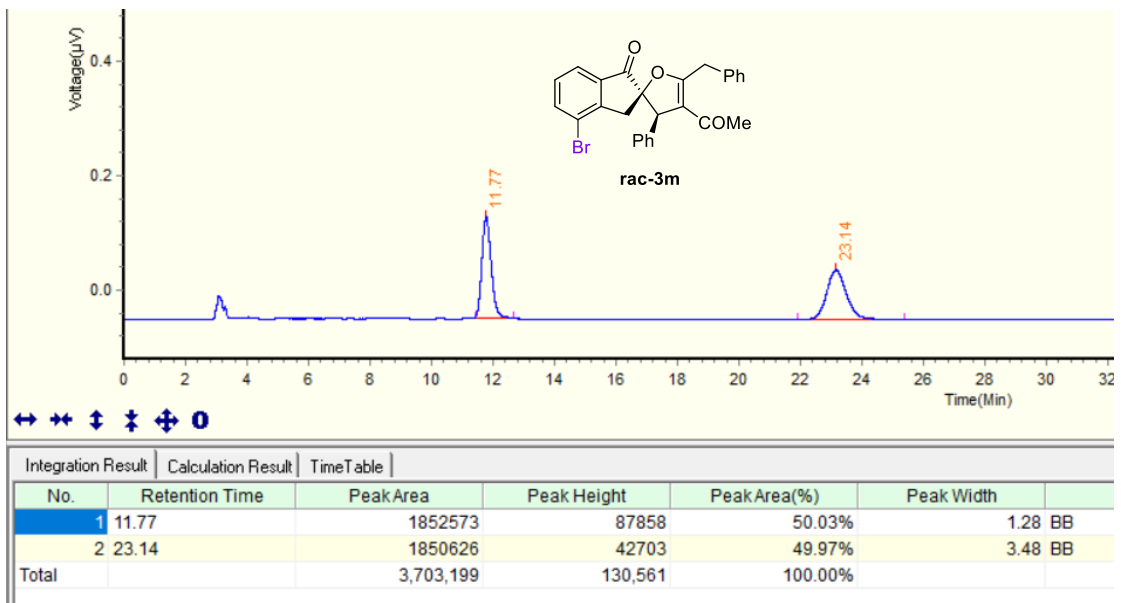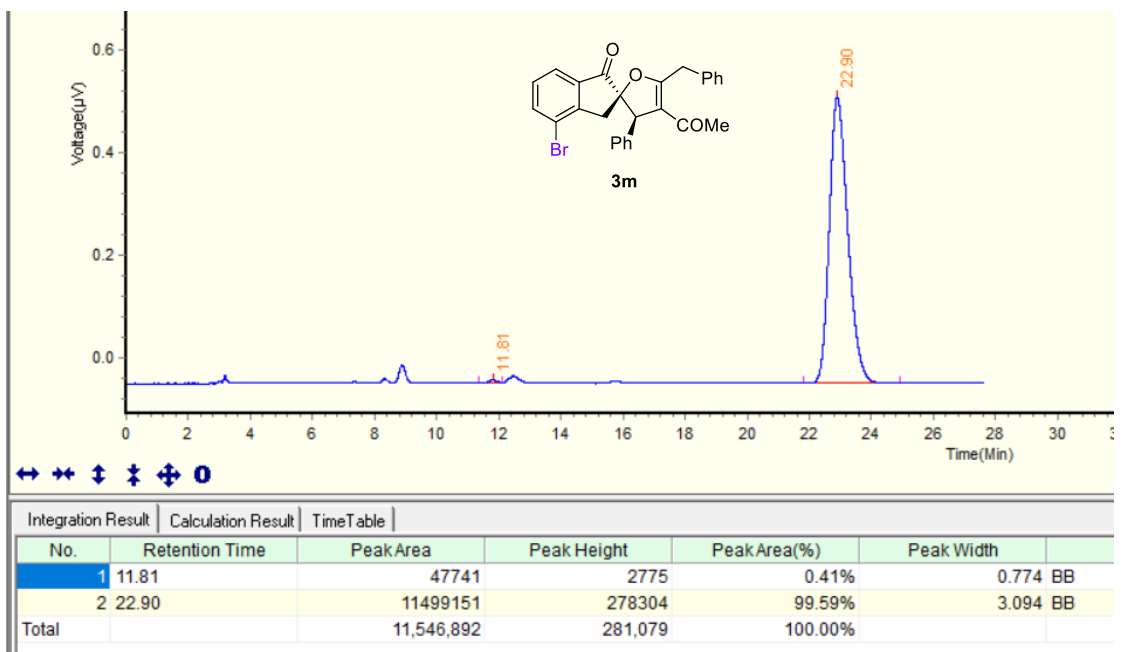

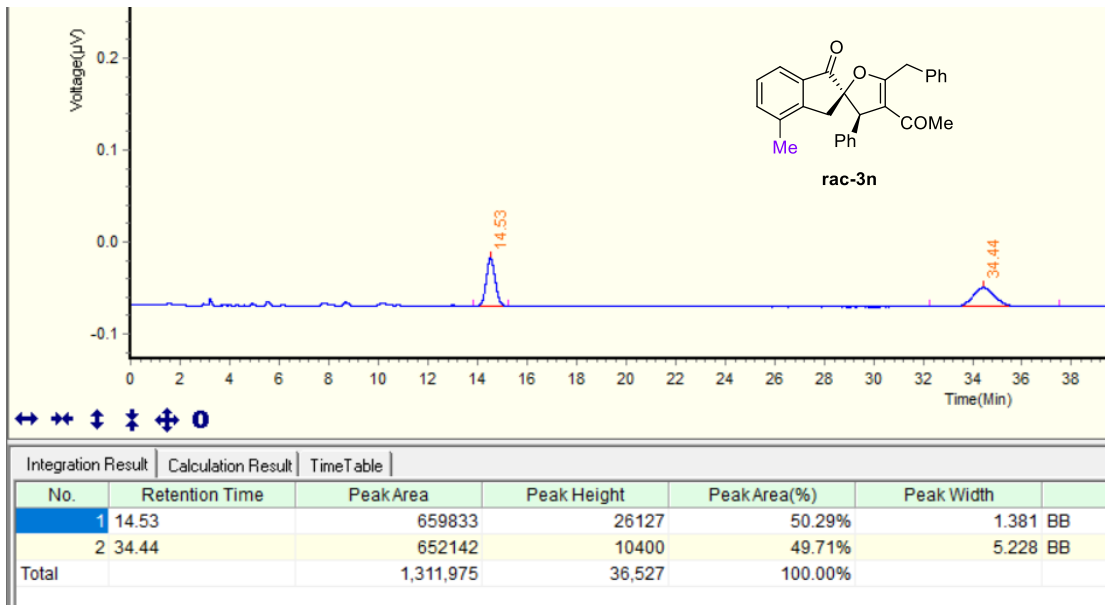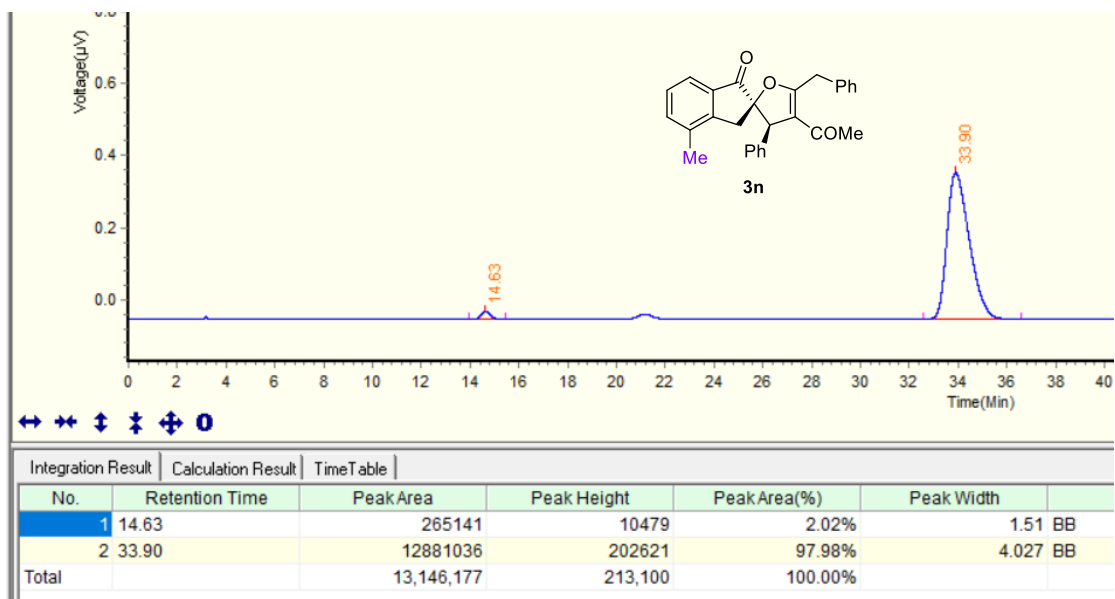

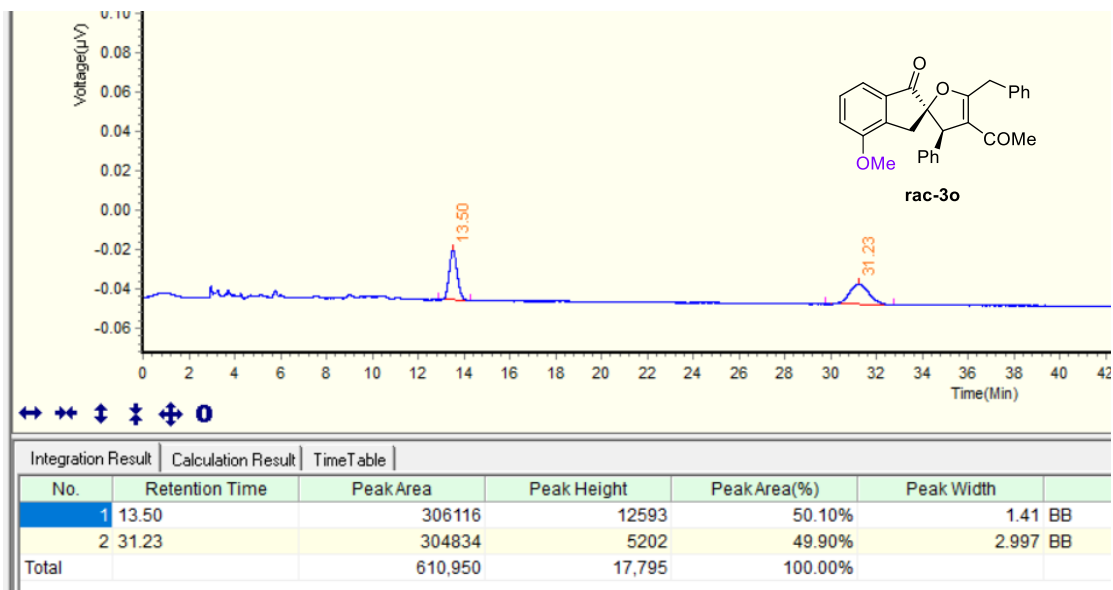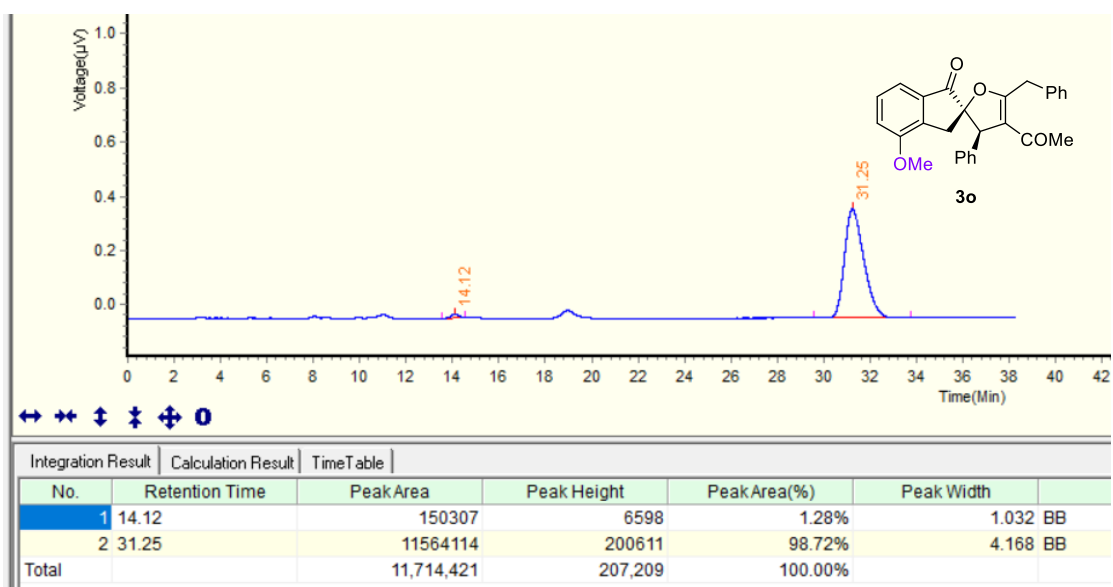

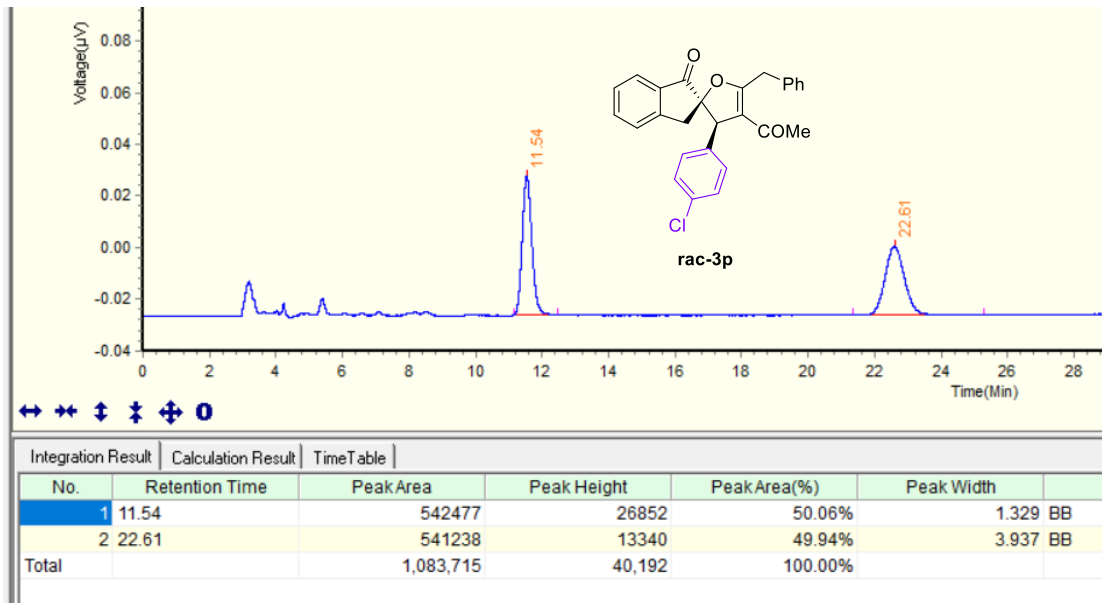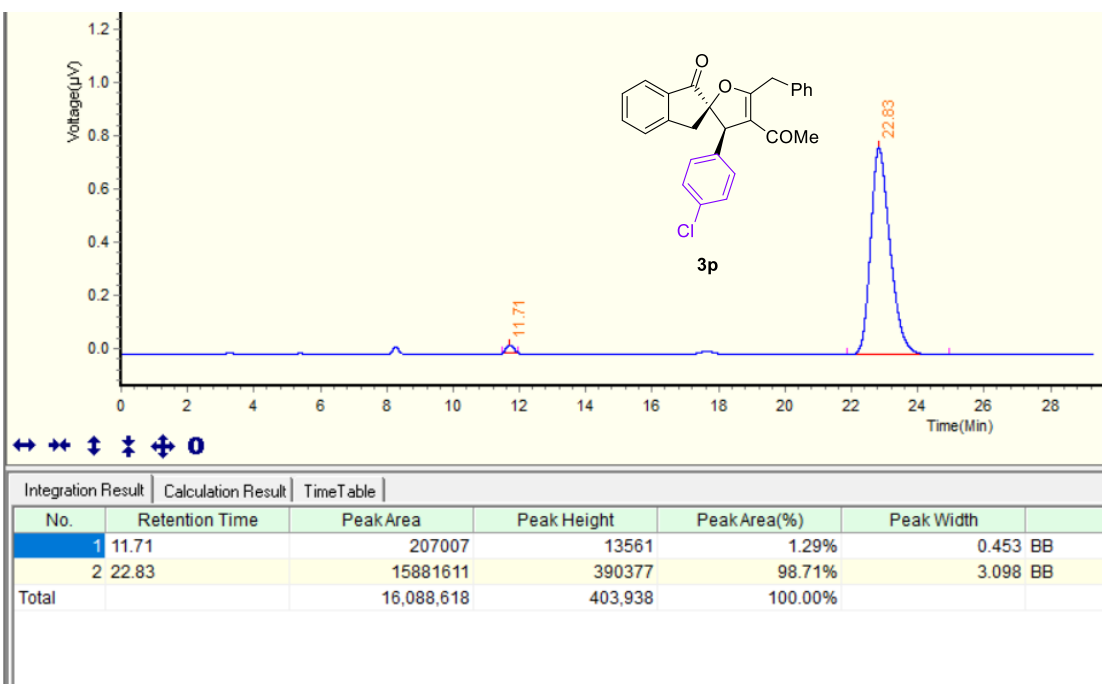

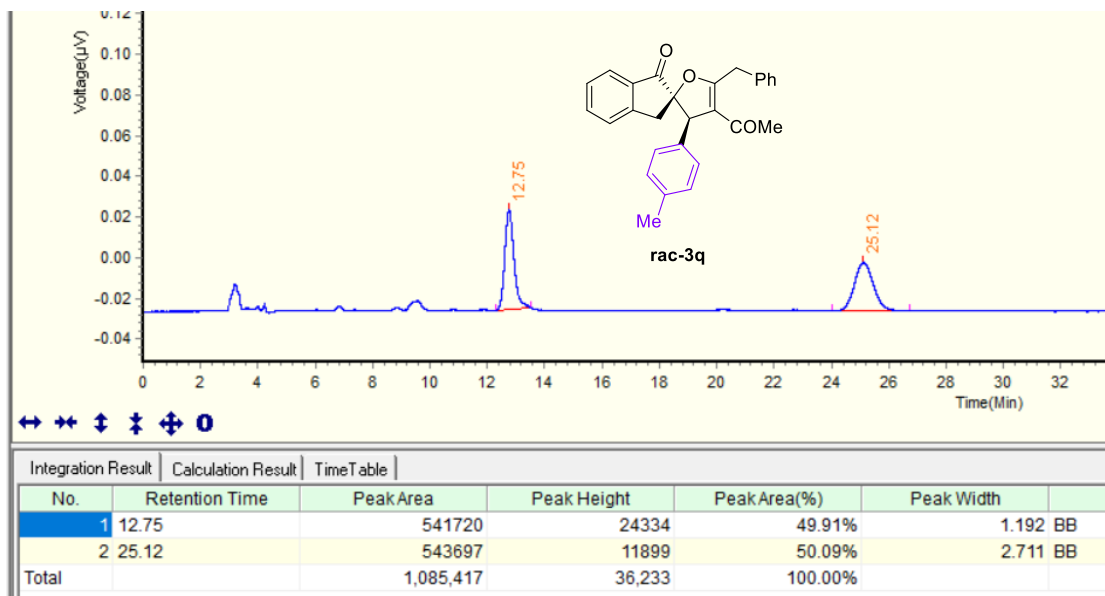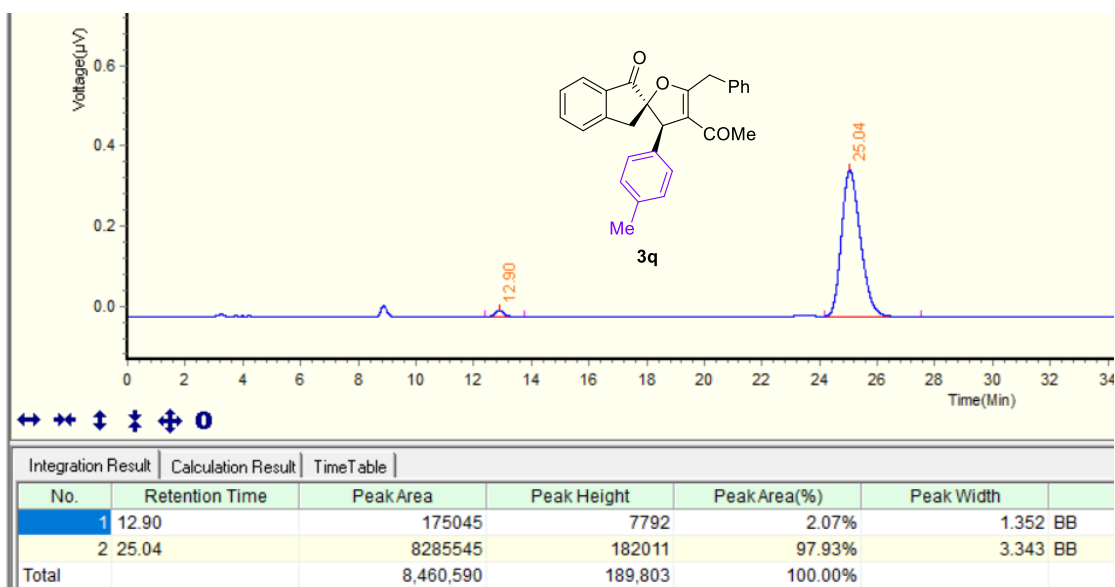

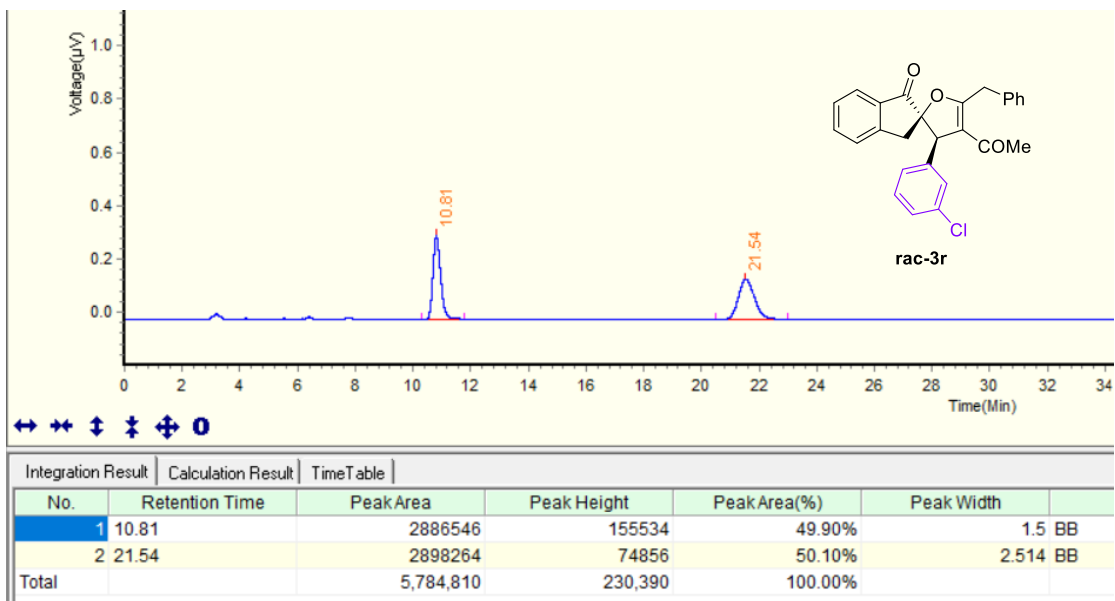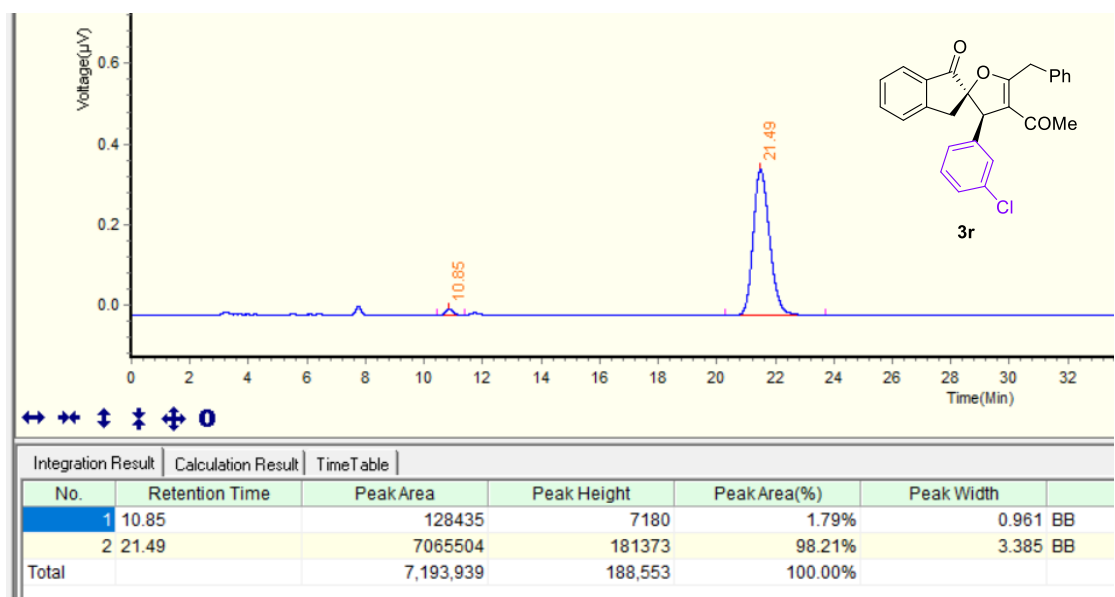



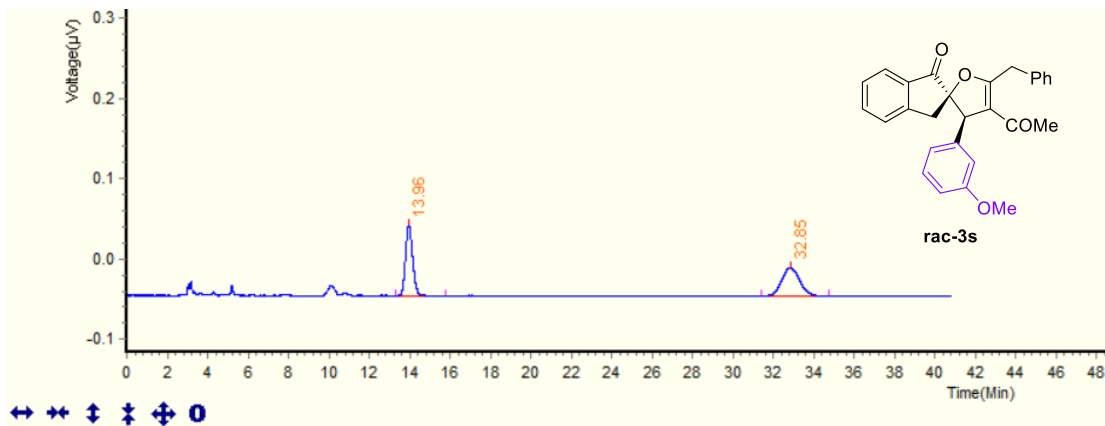

| No.   | Retention Time | PeakArea  | Peak Height | PeakArea(%) | Peak Width |
|-------|----------------|-----------|-------------|-------------|------------|
| 1     | 13.96          | 1080035   | 44070       | 50.02%      | 2.452 BB   |
| 2     | 32.85          | 1078995   | 17732       | 49.98%      | 3.342 BB   |
| Total |                | 2,159,030 | 61,802      | 100.00%     |            |

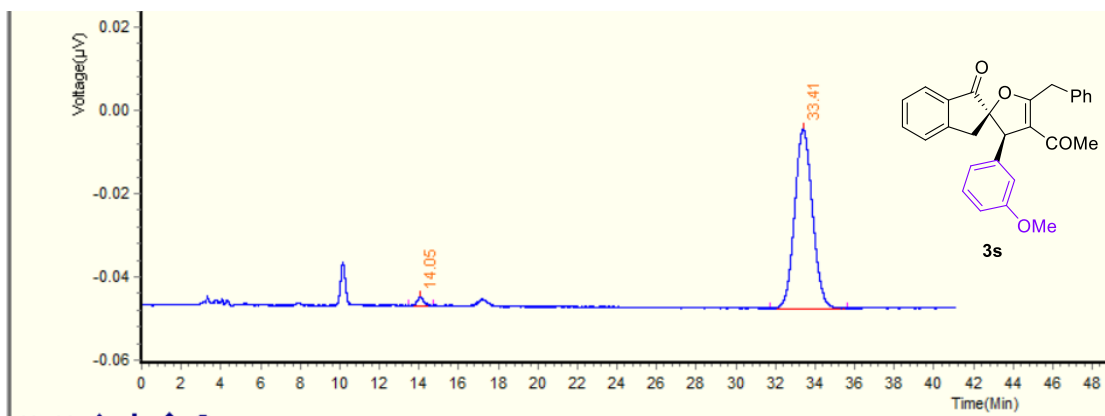

| No.   | Retention Time | PeakArea  | Peak Height | PeakArea(%) | Peak Width |
|-------|----------------|-----------|-------------|-------------|------------|
| 1     | 14.05          | 23093     | 970         | 1.68%       | 1.278 BB   |
| 2     | 33.41          | 1349573   | 21580       | 98.32%      | 3.962 BB   |
| Total |                | 1,372,666 | 22,550      | 100.00%     |            |

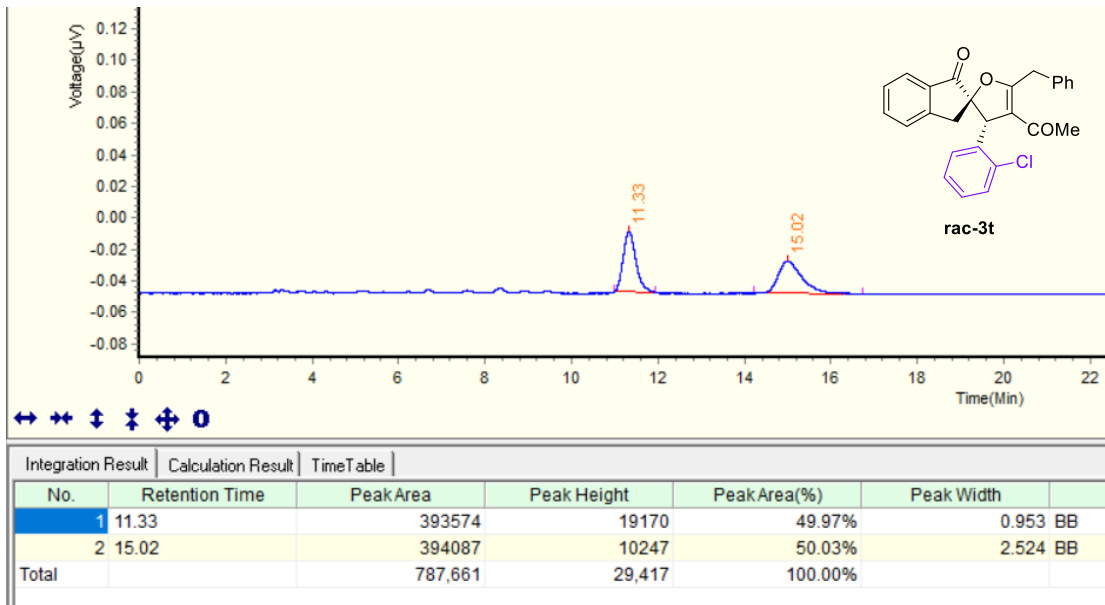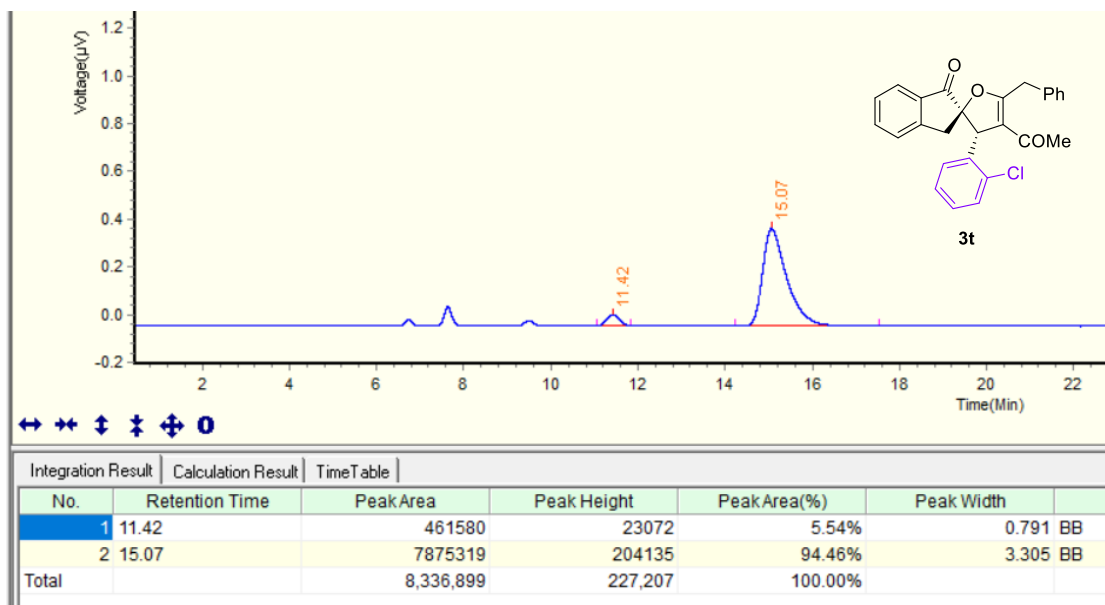

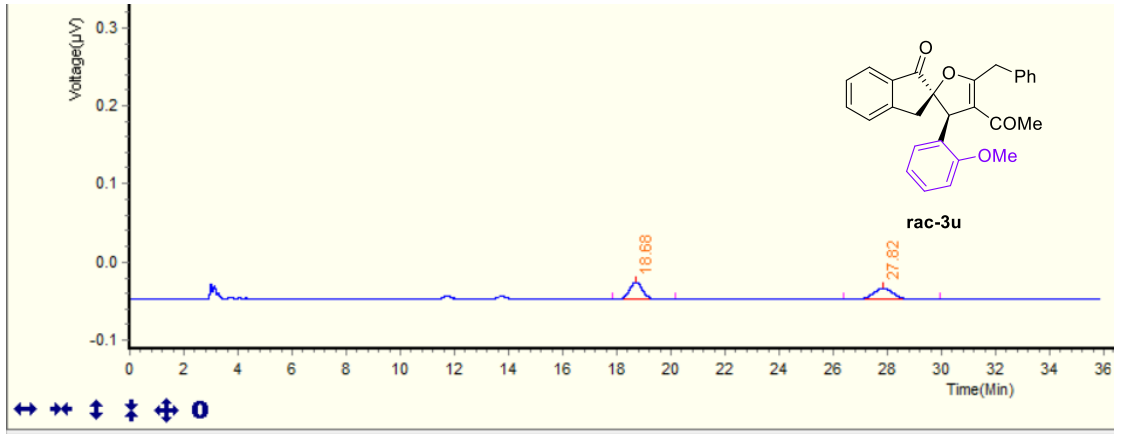

| No.   | Retention Time | PeakArea | Peak Height | PeakArea(%) | Peak Width |
|-------|----------------|----------|-------------|-------------|------------|
| 1     | 18.68          | 367643   | 10976       | 49.88%      | 2.302 BB   |
| 2     | 27.82          | 369367   | 7085        | 50.12%      | 3.563 BB   |
| Total |                | 737,010  | 18,061      | 100.00%     |            |

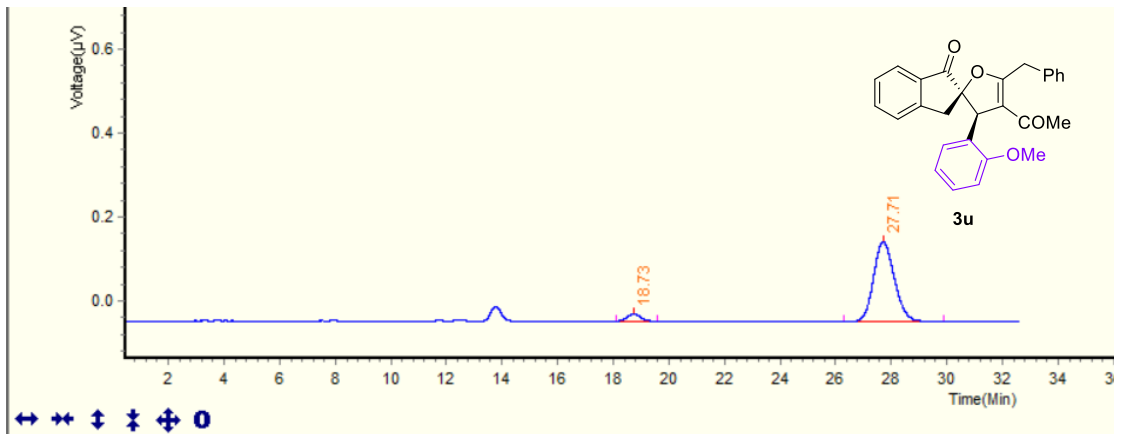

| No.   | Retention Time | PeakArea  | Peak Height | PeakArea(%) | Peak Width |
|-------|----------------|-----------|-------------|-------------|------------|
| 1     | 18.73          | 285124    | 8623        | 5.52%       | 1.488 BB   |
| 2     | 27.71          | 4884598   | 94837       | 94.48%      | 3.584 BB   |
| Total |                | 5,169,722 | 103,460     | 100.00%     |            |

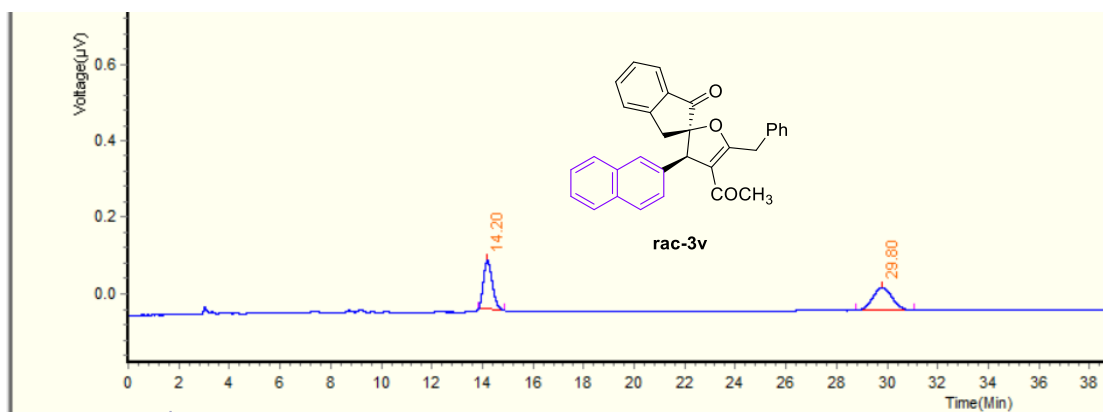

← → ↑ ↓ ⊕ ⊖

| No.   | Retention Time | PeakArea  | Peak Height | PeakArea(%) | Peak Width |
|-------|----------------|-----------|-------------|-------------|------------|
| 1     | 14.20          | 1579784   | 64265       | 49.87%      | 1.039 BB   |
| 2     | 29.80          | 1587824   | 29639       | 50.13%      | 2.314 BB   |
| Total |                | 3,167,608 | 93,904      | 100.00%     |            |

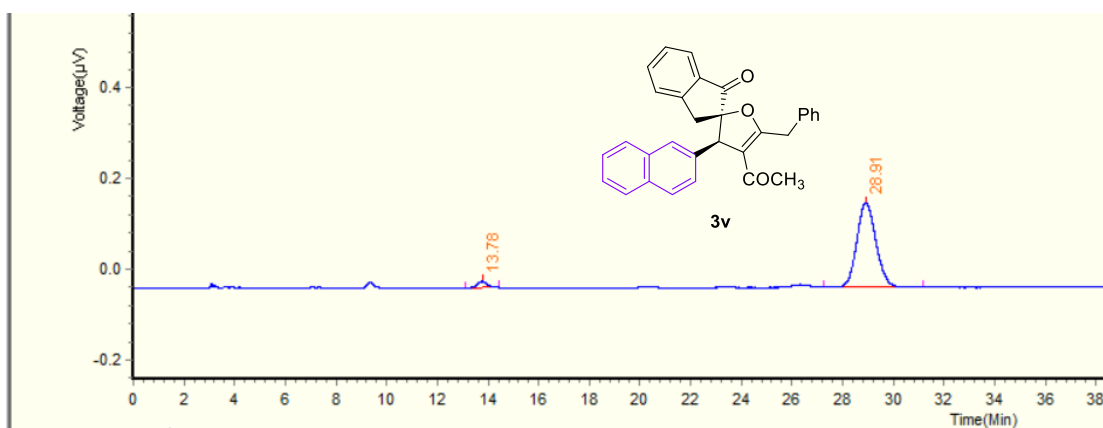

← → ↑ ↓ ⊕ ⊖

| No.   | Retention Time | PeakArea  | Peak Height | PeakArea(%) | Peak Width |
|-------|----------------|-----------|-------------|-------------|------------|
| 1     | 13.78          | 172896    | 6598        | 3.42%       | 1.33 BB    |
| 2     | 28.91          | 4884591   | 93297       | 96.58%      | 3.909 BB   |
| Total |                | 5,057,487 | 99,895      | 100.00%     |            |

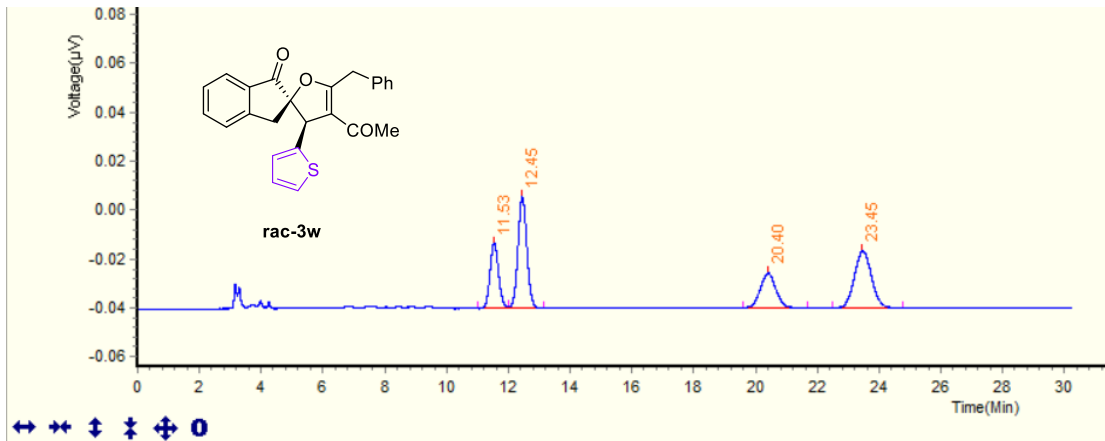

| Integration Result |                | Calculation Result |             | TimeTable    |            |
|--------------------|----------------|--------------------|-------------|--------------|------------|
| No.                | Retention Time | Peak Area          | Peak Height | Peak Area(%) | Peak Width |
| 1                  | 11.53          | 257930             | 13342       | 18.39%       | 0.97 BV    |
| 2                  | 12.45          | 454544             | 22700       | 32.41%       | 1.158 VB   |
| 3                  | 20.40          | 245979             | 7075        | 17.54%       | 2.129 BB   |
| 4                  | 23.45          | 444196             | 11574       | 31.67%       | 2.255 BB   |
| Total              |                | 1,402,649          | 54,691      | 100.00%      |            |

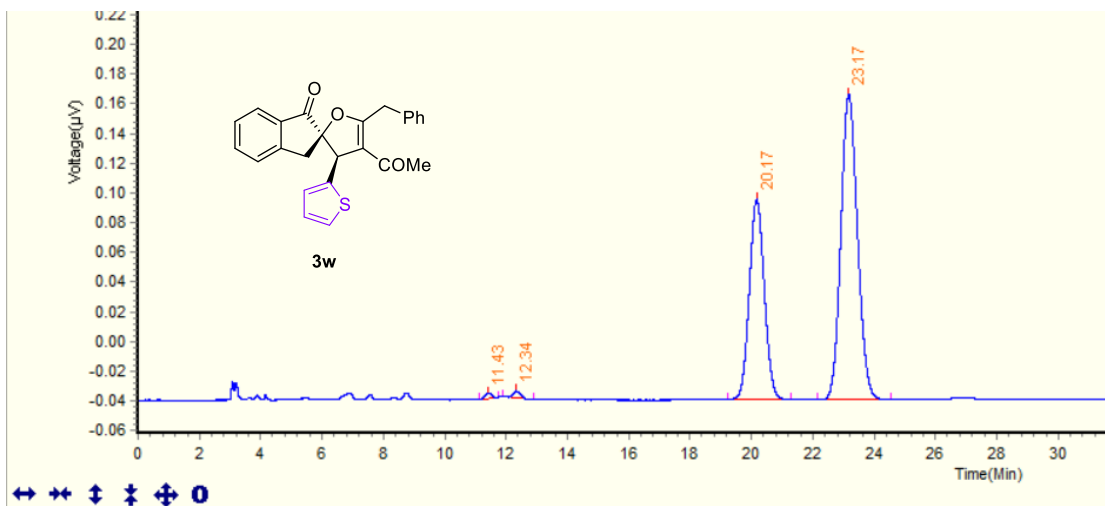

| Integration Result |                | Calculation Result |             | TimeTable    |            |
|--------------------|----------------|--------------------|-------------|--------------|------------|
| No.                | Retention Time | Peak Area          | Peak Height | Peak Area(%) | Peak Width |
| 1                  | 11.43          | 26360              | 1721        | 0.42%        | 0.639 BB   |
| 2                  | 12.34          | 31468              | 2198        | 0.51%        | 0.998 BB   |
| 3                  | 20.17          | 2280065            | 67260       | 36.75%       | 2.078 BB   |
| 4                  | 23.17          | 3866186            | 102814      | 62.32%       | 2.438 BB   |
| Total              |                | 6,204,079          | 173,993     | 100.00%      |            |

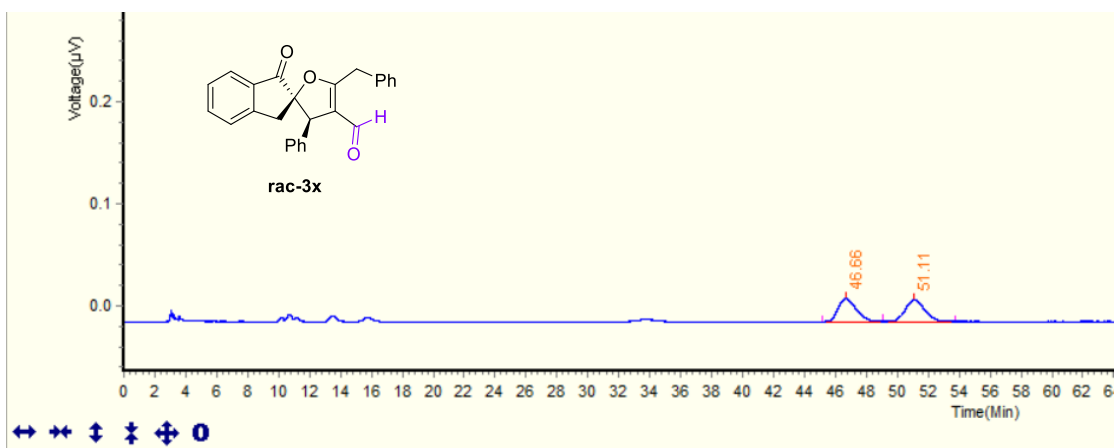

| No.   | Retention Time | Peak Area | Peak Height | Peak Area(%) | Peak Width |
|-------|----------------|-----------|-------------|--------------|------------|
| 1     | 46.66          | 901086    | 11147       | 49.56%       | 3.845 BV   |
| 2     | 51.11          | 917132    | 10469       | 50.44%       | 4.72 VB    |
| Total |                | 1,818,218 | 21,616      | 100.00%      |            |

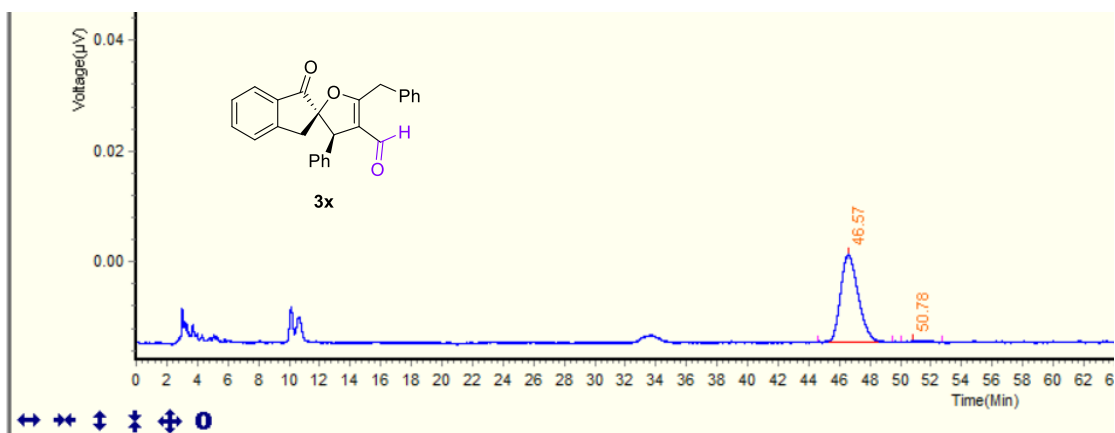

| No.   | Retention Time | Peak Area | Peak Height | Peak Area(%) | Peak Width |
|-------|----------------|-----------|-------------|--------------|------------|
| 1     | 46.57          | 633753    | 7880        | 98.77%       | 4.893 BB   |
| 2     | 50.78          | 7860      | 150         | 1.23%        | 2.681 BB   |
| Total |                | 641,613   | 8,030       | 100.00%      |            |

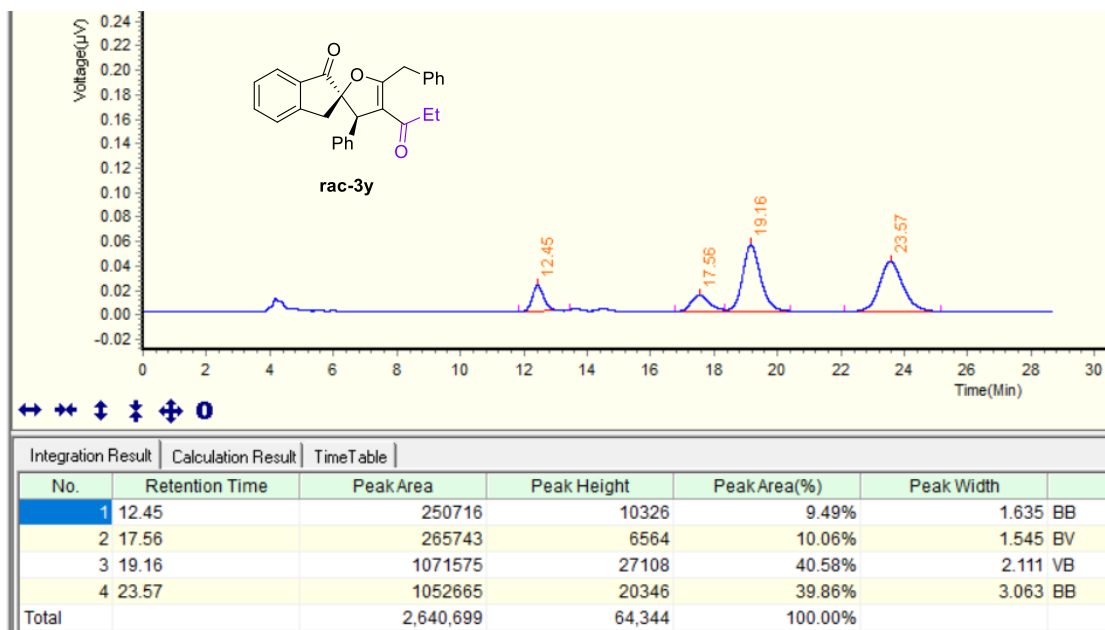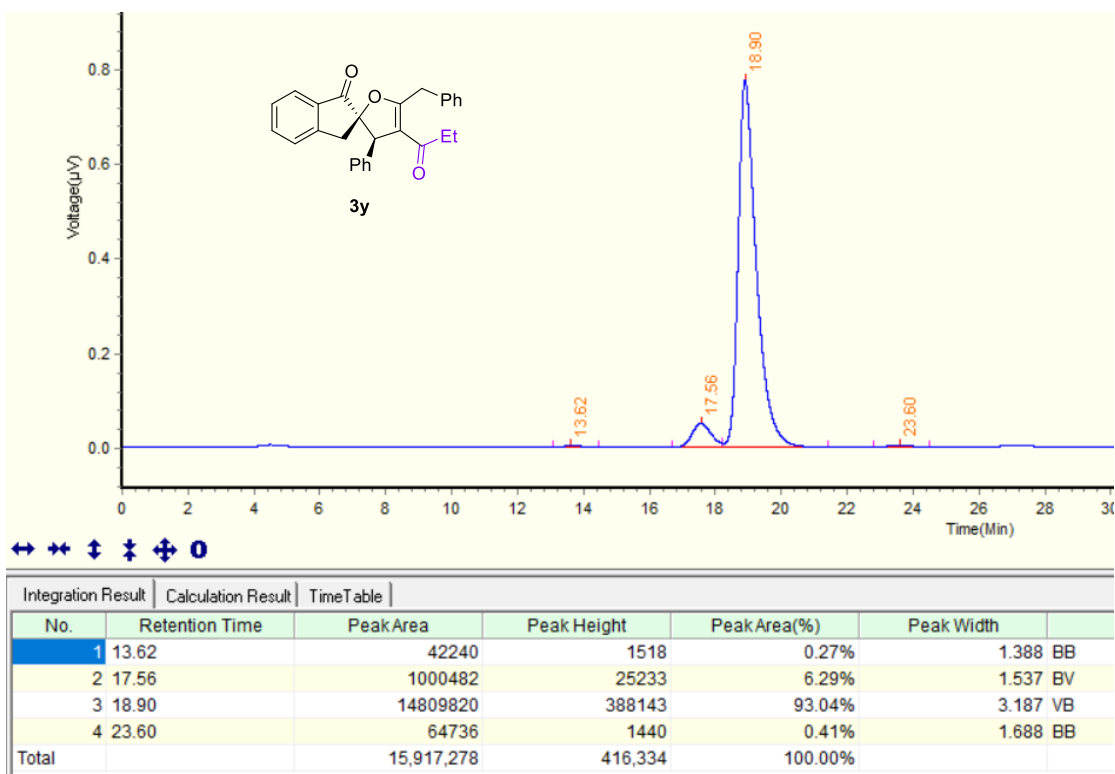

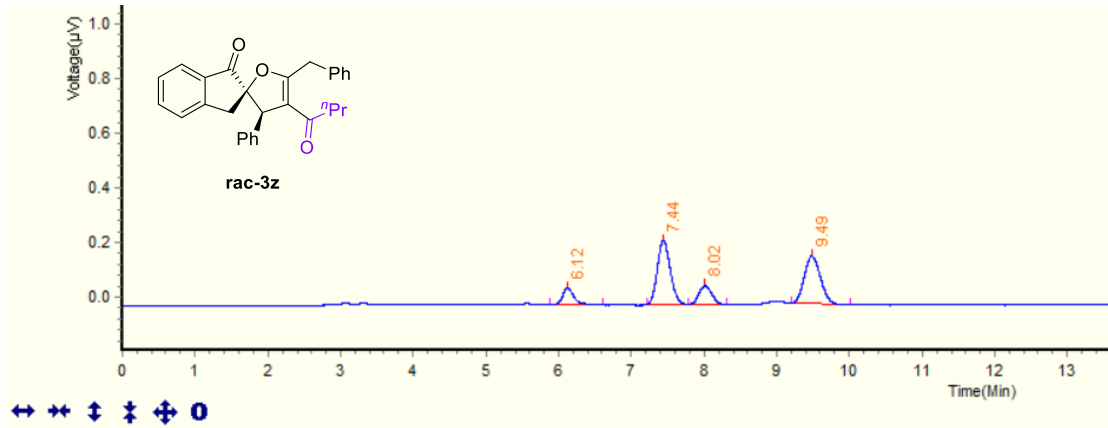

| No.   | Retention Time | Peak Area | Peak Height | PeakArea(%) | Peak Width |
|-------|----------------|-----------|-------------|-------------|------------|
| 1     | 6.12           | 329937    | 31367       | 9.26%       | 0.733 BB   |
| 2     | 7.44           | 1454221   | 117280      | 40.79%      | 0.572 BV   |
| 3     | 8.02           | 438833    | 34450       | 12.31%      | 0.537 VB   |
| 4     | 9.49           | 1341948   | 87119       | 37.64%      | 0.823 BB   |
| Total |                | 3,564,939 | 270,216     | 100.00%     |            |

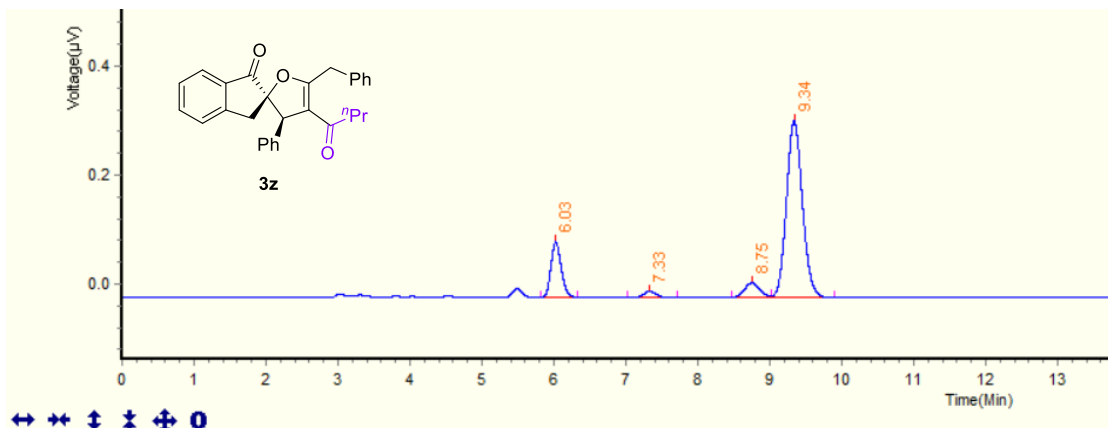

| No.   | Retention Time | Peak Area | Peak Height | PeakArea(%) | Peak Width |
|-------|----------------|-----------|-------------|-------------|------------|
| 1     | 6.03           | 508334    | 50982       | 15.49%      | 0.511 BB   |
| 2     | 7.33           | 67583     | 5414        | 2.06%       | 0.7 BB     |
| 3     | 8.75           | 200963    | 13468       | 6.13%       | 0.551 BV   |
| 4     | 9.34           | 2504123   | 162470      | 76.32%      | 0.877 VB   |
| Total |                | 3,281,003 | 232,334     | 100.00%     |            |



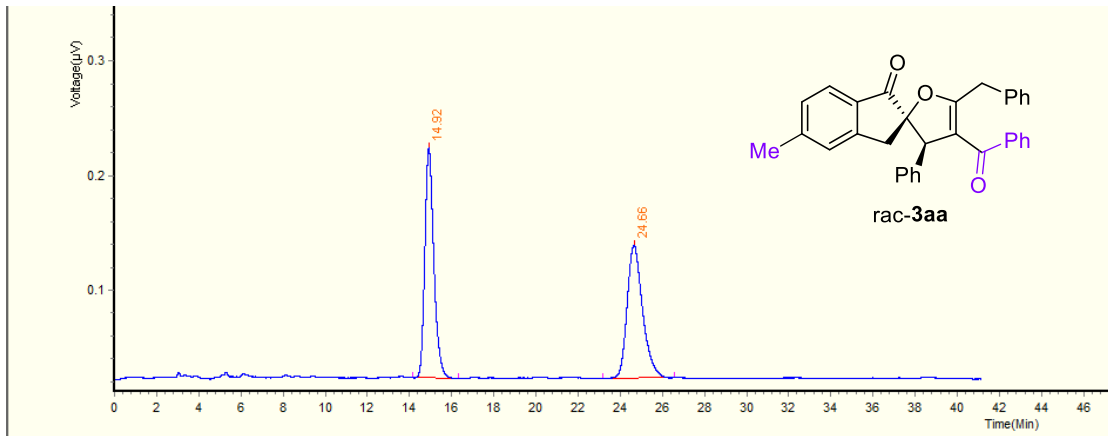

Navigation icons: left arrow, right arrow, zoom in, zoom out, and a circle with a crosshair.

| Integration Result |                | Calculation Result |             | TimeTable    |            |
|--------------------|----------------|--------------------|-------------|--------------|------------|
| No.                | Retention Time | Peak Area          | Peak Height | Peak Area(%) | Peak Width |
| 1                  | 14.92          | 2971095            | 100200      | 50.08%       | 2.147 BB   |
| 2                  | 24.66          | 2961726            | 57880       | 49.92%       | 3.423 BB   |
| Total              |                | 5,932,821          | 158,080     | 100.00%      |            |

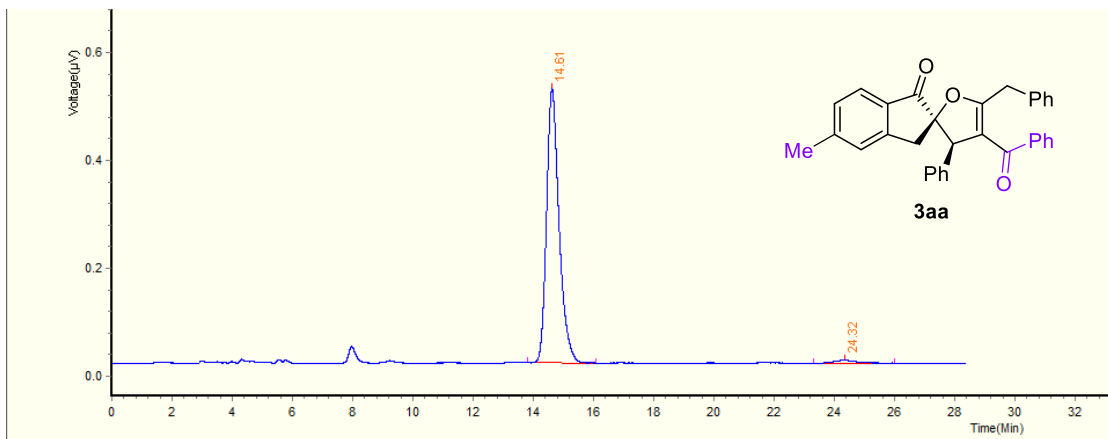

Navigation icons: left arrow, right arrow, zoom in, zoom out, and a circle with a crosshair.

| Integration Result |                | Calculation Result |             | TimeTable    |            |
|--------------------|----------------|--------------------|-------------|--------------|------------|
| No.                | Retention Time | Peak Area          | Peak Height | Peak Area(%) | Peak Width |
| 1                  | 14.61          | 7325580            | 253978      | 98.25%       | 2.26 BB    |
| 2                  | 24.32          | 130768             | 2597        | 1.75%        | 2.676 BB   |
| Total              |                | 7,456,348          | 256,575     | 100.00%      |            |

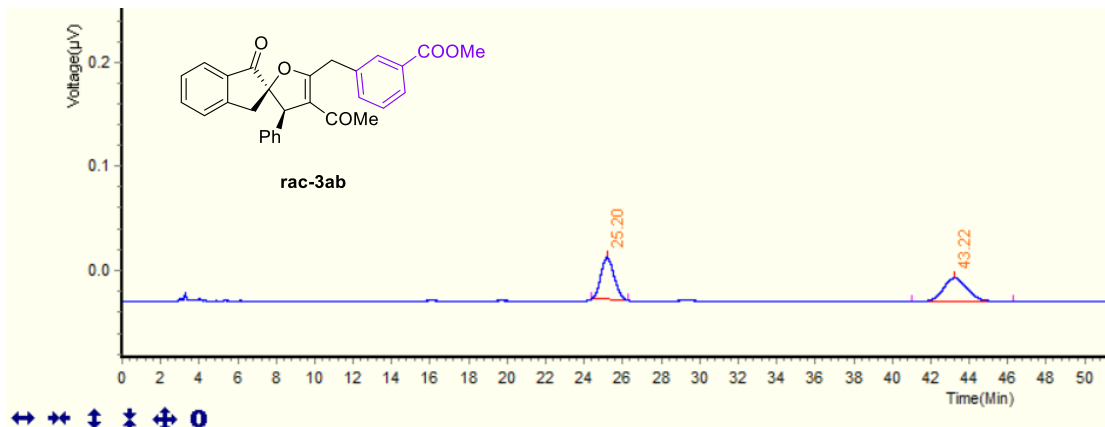

| No.   | Retention Time | PeakArea  | Peak Height | PeakArea(%) | Peak Width |
|-------|----------------|-----------|-------------|-------------|------------|
| 1     | 25.20          | 972822    | 20075       | 50.08%      | 1.889 BB   |
| 2     | 43.22          | 969802    | 11280       | 49.92%      | 5.289 BB   |
| Total |                | 1,942,624 | 31,355      | 100.00%     |            |

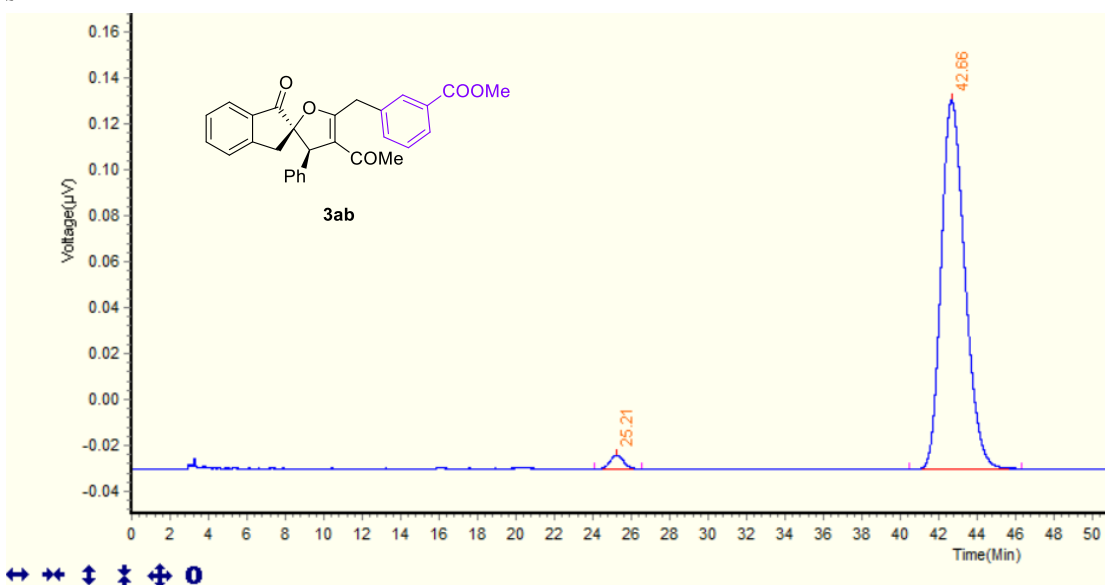

| No.   | Retention Time | PeakArea  | Peak Height | PeakArea(%) | Peak Width |
|-------|----------------|-----------|-------------|-------------|------------|
| 1     | 25.21          | 145874    | 3006        | 2.09%       | 2.458 BB   |
| 2     | 42.66          | 6841055   | 80231       | 97.91%      | 5.875 BB   |
| Total |                | 6,986,929 | 83,237      | 100.00%     |            |

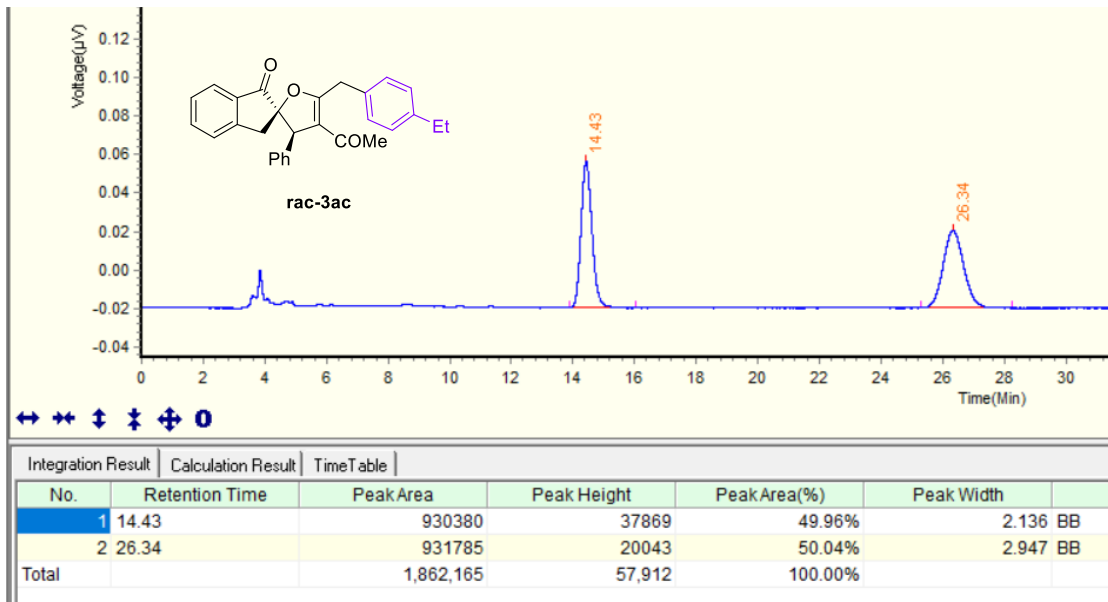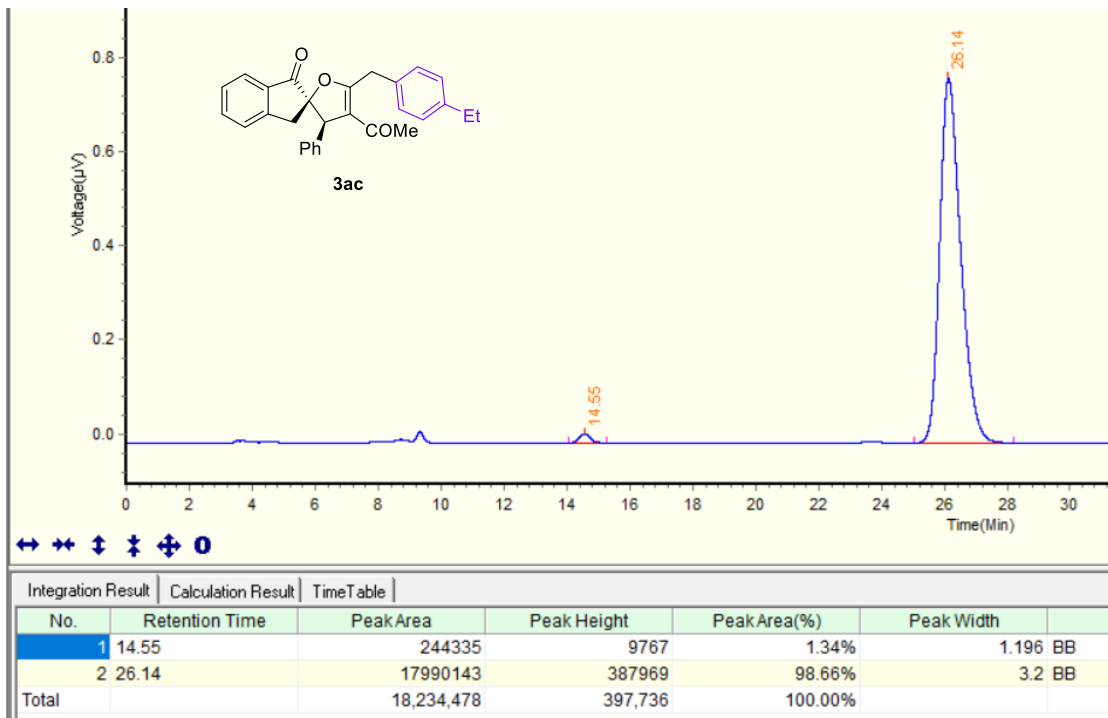

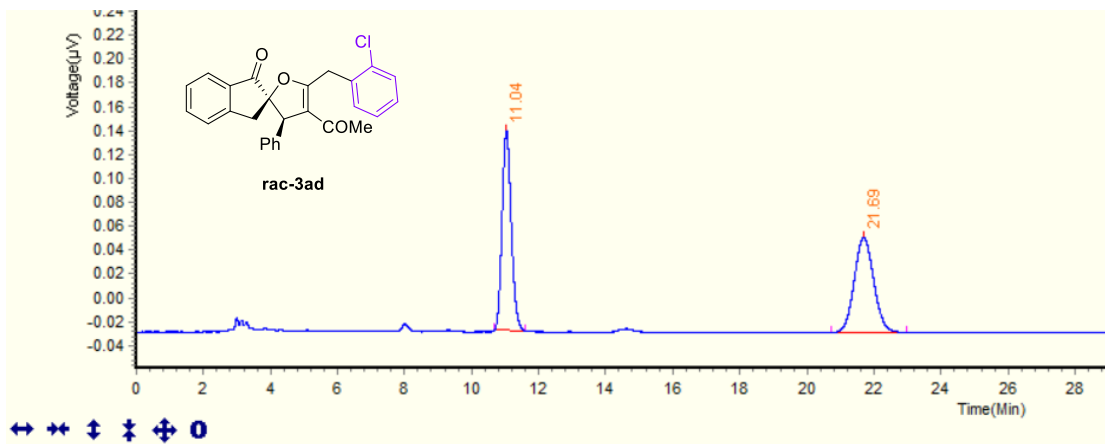

| No.   | Retention Time | PeakArea  | Peak Height | PeakArea(%) | Peak Width |
|-------|----------------|-----------|-------------|-------------|------------|
| 1     | 11.04          | 1591856   | 83551       | 50.16%      | 0.938 BB   |
| 2     | 21.69          | 1581675   | 39498       | 49.84%      | 2.243 BB   |
| Total |                | 3,173,531 | 123,049     | 100.00%     |            |

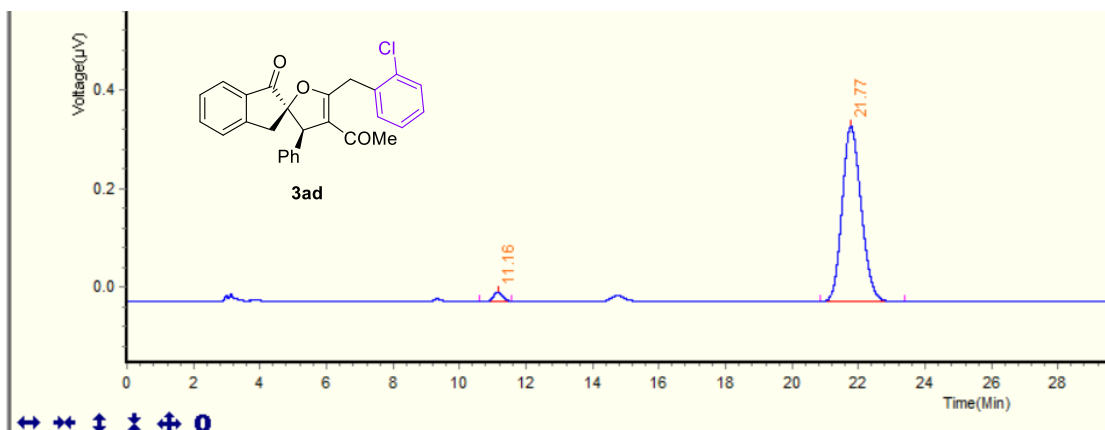

| No.   | Retention Time | PeakArea  | Peak Height | PeakArea(%) | Peak Width |
|-------|----------------|-----------|-------------|-------------|------------|
| 1     | 11.16          | 168390    | 8756        | 2.33%       | 0.972 BB   |
| 2     | 21.77          | 7053813   | 177199      | 97.67%      | 2.518 BB   |
| Total |                | 7,222,203 | 185,955     | 100.00%     |            |

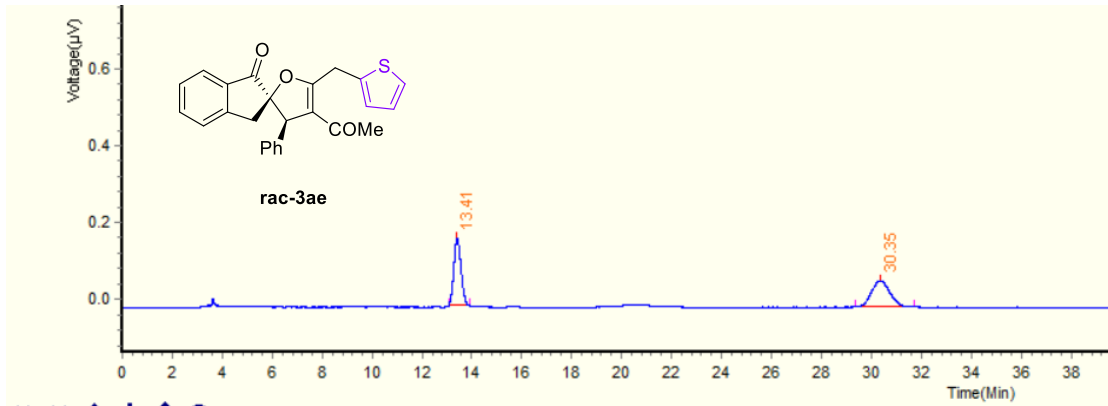

| No.   | Retention Time | PeakArea  | Peak Height | PeakArea(%) | Peak Width |
|-------|----------------|-----------|-------------|-------------|------------|
| 1     | 13.41          | 1743649   | 86542       | 50.05%      | 0.826 BB   |
| 2     | 30.35          | 1740160   | 33844       | 49.95%      | 2.355 BB   |
| Total |                | 3,483,809 | 120,386     | 100.00%     |            |

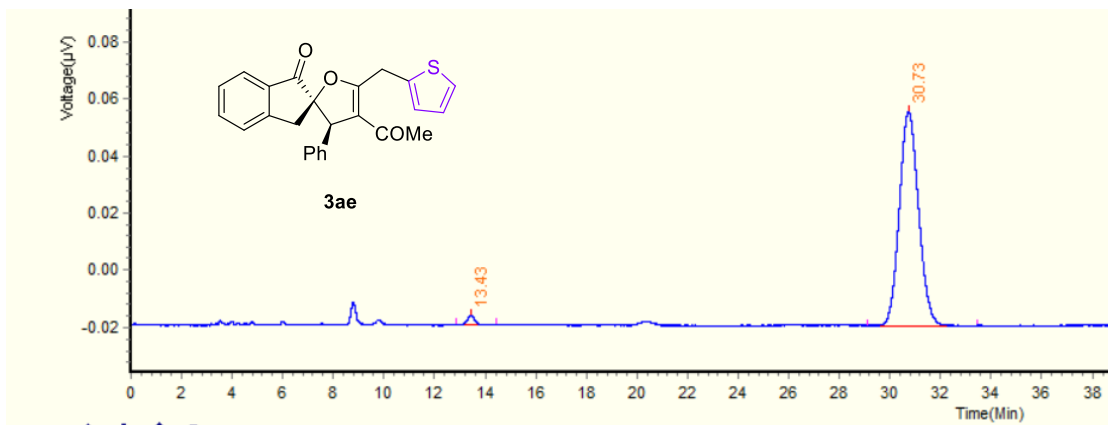

| No.   | Retention Time | PeakArea  | Peak Height | PeakArea(%) | Peak Width |
|-------|----------------|-----------|-------------|-------------|------------|
| 1     | 13.43          | 32119     | 1677        | 1.60%       | 1.548 BB   |
| 2     | 30.73          | 1979628   | 37501       | 98.40%      | 4.361 BB   |
| Total |                | 2,011,747 | 39,178      | 100.00%     |            |

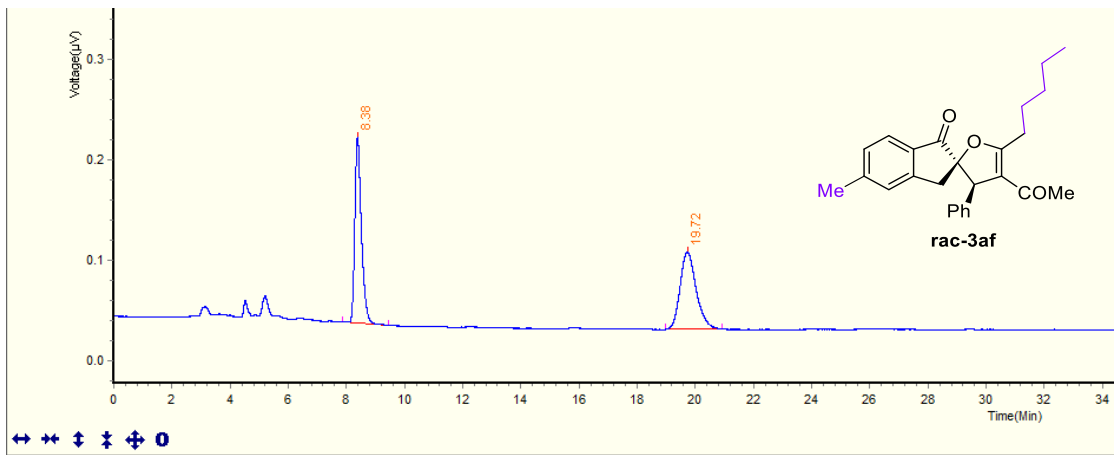

| No.   | Retention Time | Peak Area | Peak Height | Peak Area(%) | Peak Width |
|-------|----------------|-----------|-------------|--------------|------------|
| 1     | 8.38           | 1449654   | 92504       | 49.64%       | 1.581 BB   |
| 2     | 19.72          | 1470668   | 38500       | 50.36%       | 1.946 BB   |
| Total |                | 2,920,322 | 131,004     | 100.00%      |            |

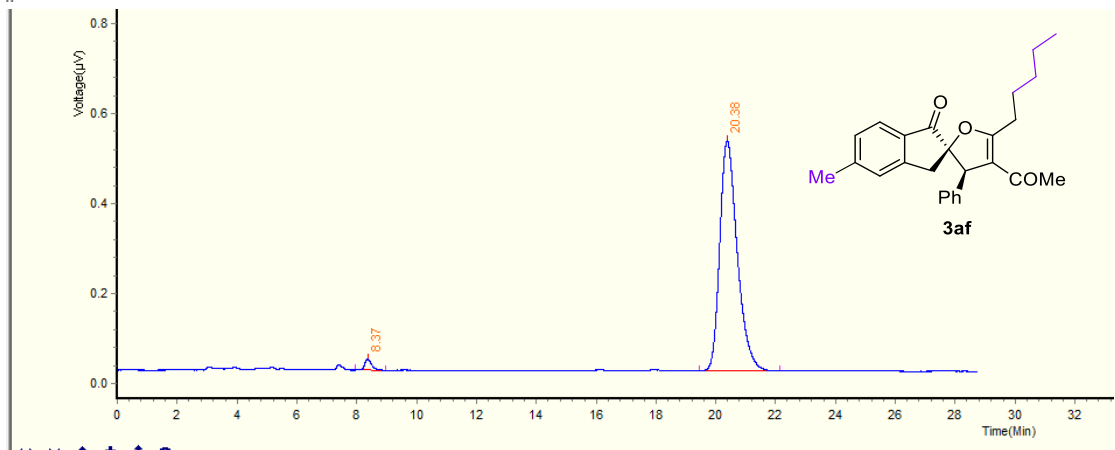

| No.   | Retention Time | Peak Area  | Peak Height | Peak Area(%) | Peak Width |
|-------|----------------|------------|-------------|--------------|------------|
| 1     | 8.37           | 197552     | 12243       | 1.88%        | 1.015 BB   |
| 2     | 20.38          | 10329043   | 254947      | 98.12%       | 2.661 BB   |
| Total |                | 10,526,595 | 267,190     | 100.00%      |            |

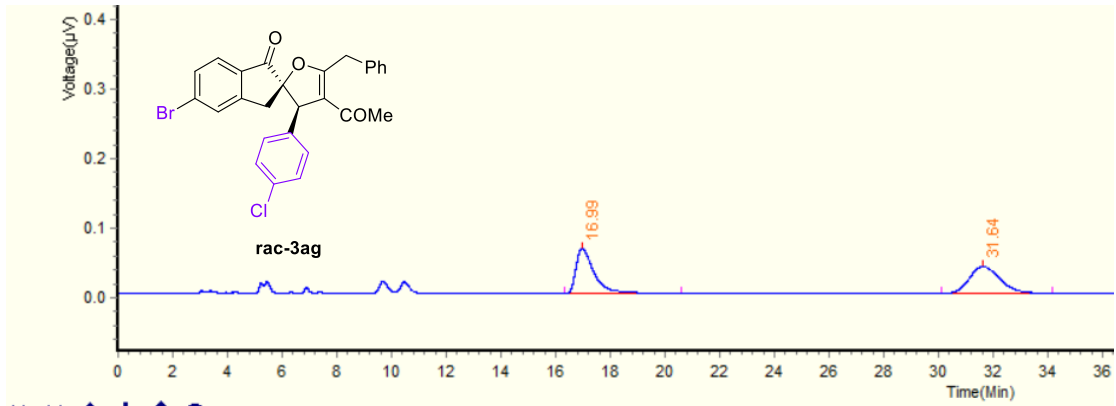

| No.   | Retention Time | Peak Area | Peak Height | Peak Area(%) | Peak Width |
|-------|----------------|-----------|-------------|--------------|------------|
| 1     | 16.99          | 1463563   | 32212       | 49.96%       | 4.265 BB   |
| 2     | 31.64          | 1465654   | 19035       | 50.04%       | 4.069 BB   |
| Total |                | 2,929,217 | 51,247      | 100.00%      |            |

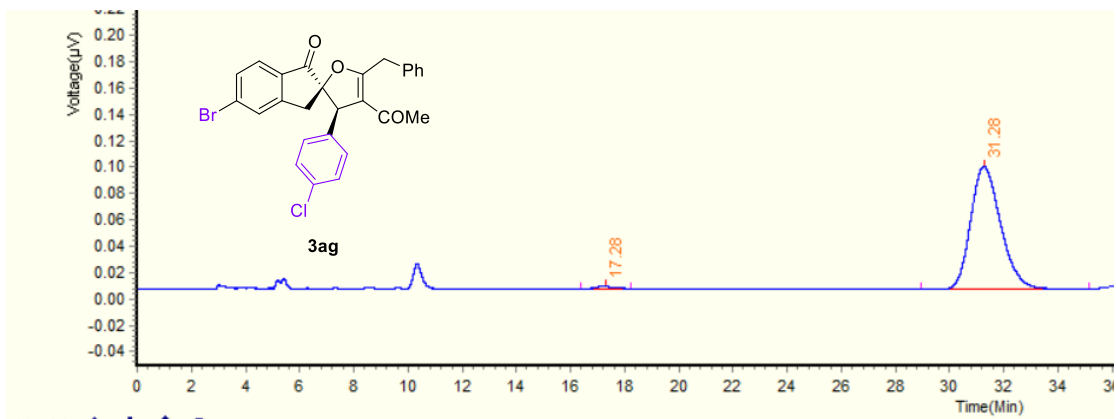

| No.   | Retention Time | Peak Area | Peak Height | Peak Area(%) | Peak Width |
|-------|----------------|-----------|-------------|--------------|------------|
| 1     | 17.28          | 40779     | 907         | 1.13%        | 1.807 BB   |
| 2     | 31.28          | 3571309   | 46553       | 98.87%       | 6.191 BB   |
| Total |                | 3,612,088 | 47,460      | 100.00%      |            |

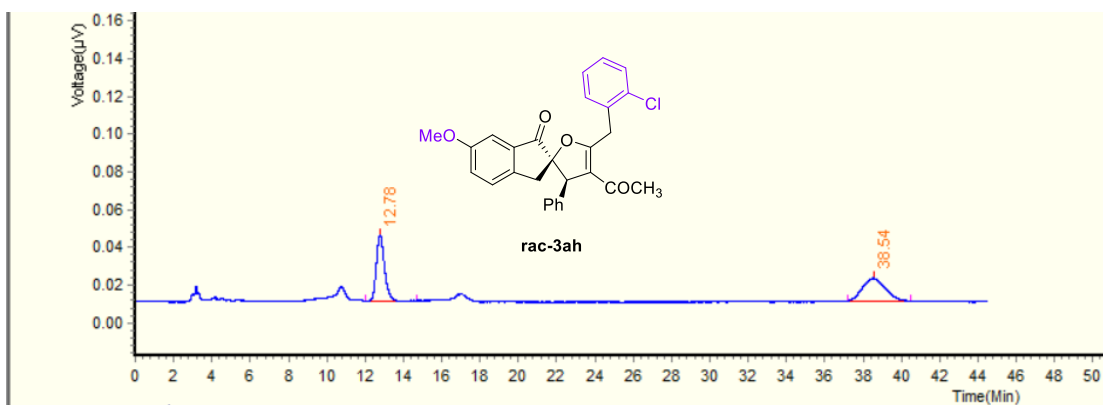

← \* ↑ ↓ ⊕ 0

| No.   | Retention Time | Peak Area | Peak Height | Peak Area(%) | Peak Width |
|-------|----------------|-----------|-------------|--------------|------------|
| 1     | 12.78          | 509479    | 17488       | 50.09%       | 2.682 BB   |
| 2     | 38.54          | 507749    | 6052        | 49.91%       | 3.328 BB   |
| Total |                | 1,017,228 | 23,540      | 100.00%      |            |

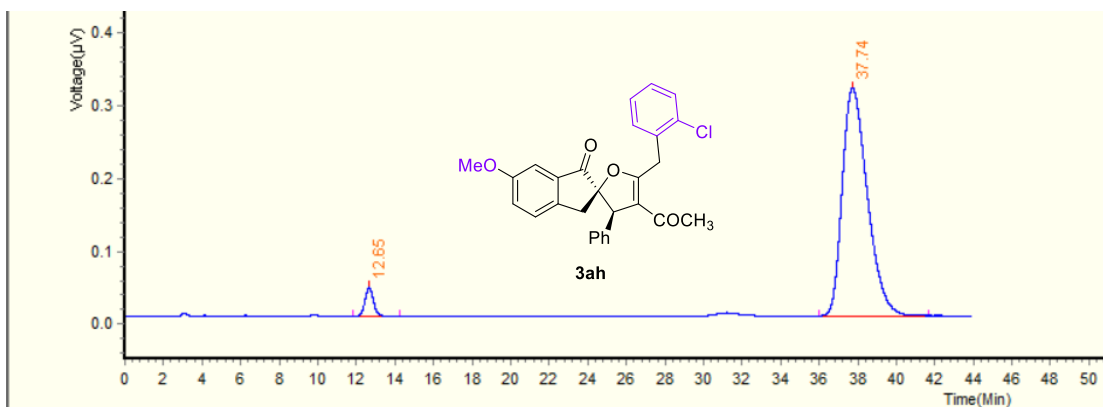

← \* ↑ ↓ ⊕ 0

| No.   | Retention Time | Peak Area  | Peak Height | Peak Area(%) | Peak Width |
|-------|----------------|------------|-------------|--------------|------------|
| 1     | 12.65          | 611077     | 19836       | 4.15%        | 2.404 BB   |
| 2     | 37.74          | 14128473   | 156344      | 95.85%       | 5.669 BB   |
| Total |                | 14,739,550 | 176,180     | 100.00%      |            |



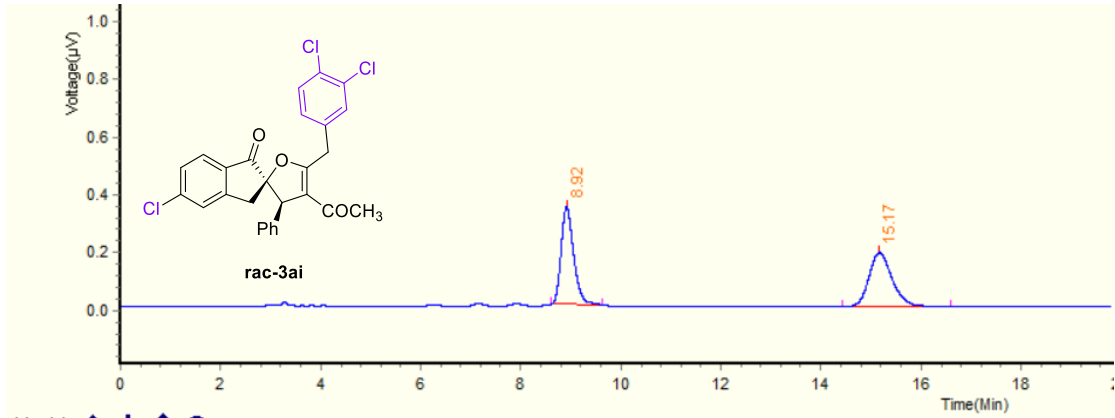

Navigation icons: left arrow, right arrow, up arrow, down arrow, zoom in, zoom out, and a circle with a dot.

| Integration Result |                | Calculation Result |             | TimeTable   |            |
|--------------------|----------------|--------------------|-------------|-------------|------------|
| No.                | Retention Time | PeakArea           | Peak Height | PeakArea(%) | Peak Width |
| 1                  | 8.92           | 2937738            | 168189      | 50.02%      | 1.042 BB   |
| 2                  | 15.17          | 2935047            | 92618       | 49.98%      | 2.186 BB   |
| Total              |                | 5,872,785          | 260,807     | 100.00%     |            |

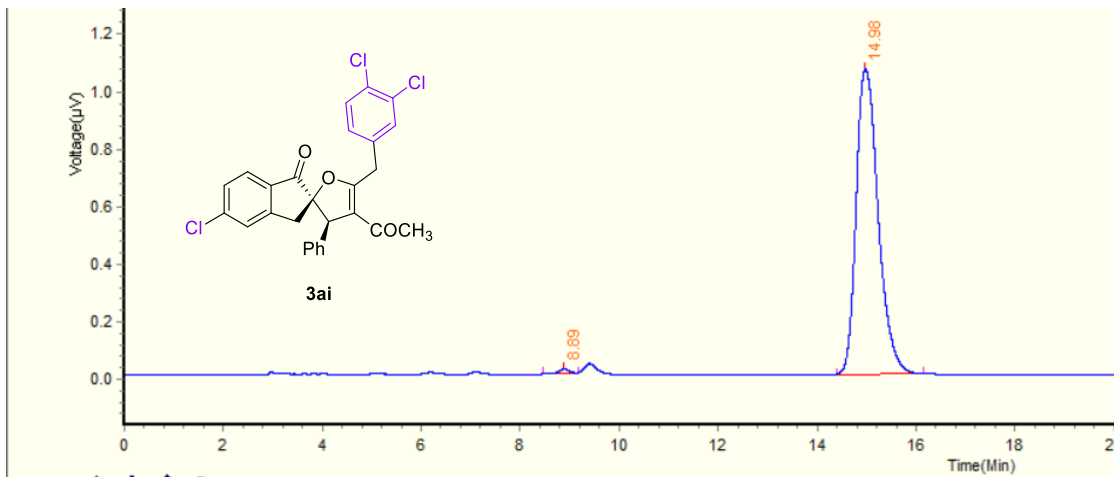

Navigation icons: left arrow, right arrow, up arrow, down arrow, zoom in, zoom out, and a circle with a dot.

| Integration Result |                | Calculation Result |             | TimeTable   |            |
|--------------------|----------------|--------------------|-------------|-------------|------------|
| No.                | Retention Time | PeakArea           | Peak Height | PeakArea(%) | Peak Width |
| 1                  | 8.89           | 83982              | 6563        | 0.51%       | 0.712 BB   |
| 2                  | 14.98          | 16402485           | 530765      | 99.49%      | 1.753 BB   |
| Total              |                | 16,486,467         | 537,328     | 100.00%     |            |

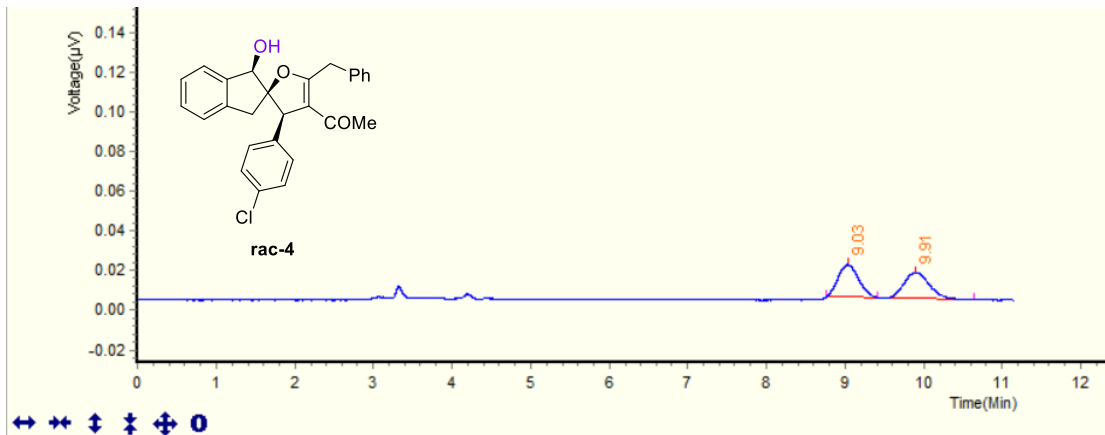

| No.   | Retention Time | PeakArea | Peak Height | PeakArea(%) | Peak Width |
|-------|----------------|----------|-------------|-------------|------------|
| 1     | 9.03           | 152518   | 8291        | 50.28%      | 0.658 BV   |
| 2     | 9.91           | 150849   | 6644        | 49.72%      | 1.223 VB   |
| Total |                | 303,367  | 14,935      | 100.00%     |            |

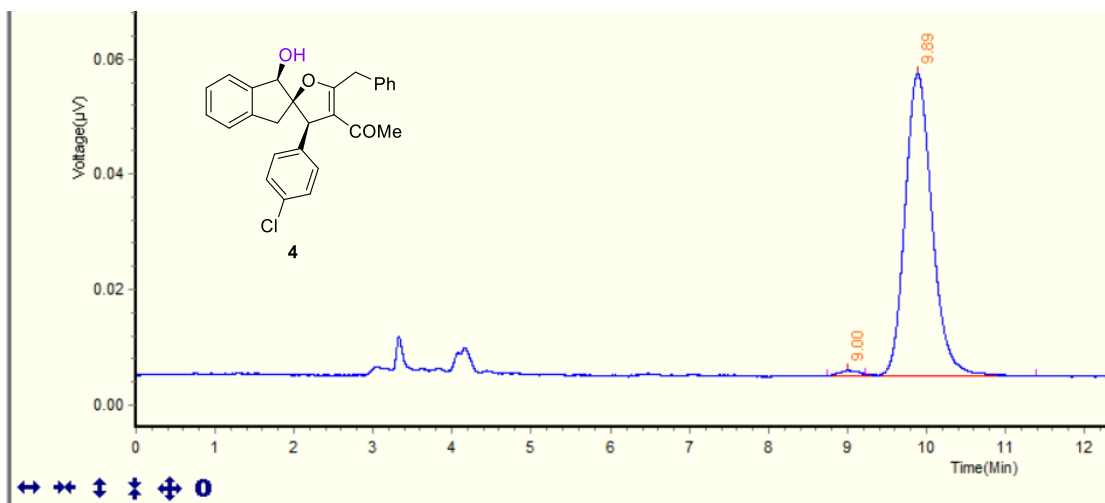

| No.   | Retention Time | PeakArea | Peak Height | PeakArea(%) | Peak Width |
|-------|----------------|----------|-------------|-------------|------------|
| 1     | 9.00           | 7152     | 472         | 1.15%       | 0.491 BV   |
| 2     | 9.89           | 617248   | 26184       | 98.85%      | 2.148 VB   |
| Total |                | 624,400  | 26,656      | 100.00%     |            |

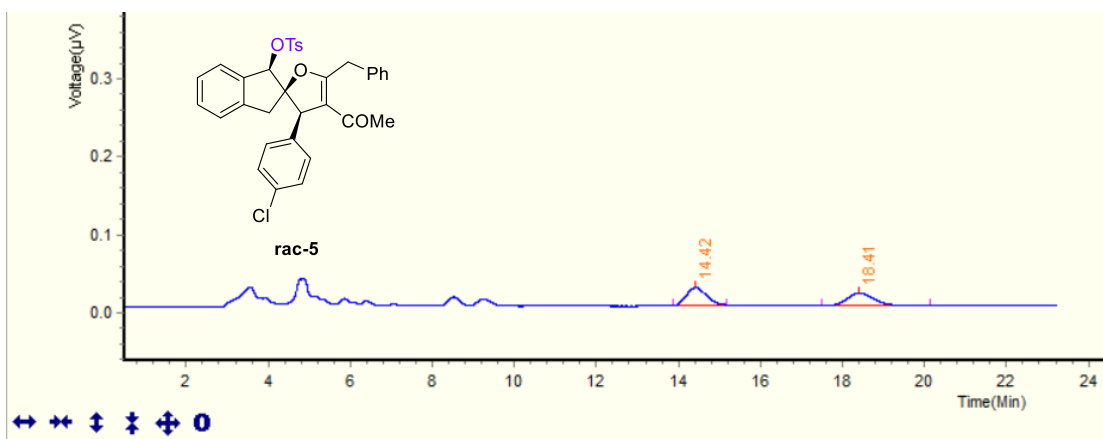

Navigation icons: left arrow, double left arrow, up arrow, double up arrow, right arrow, double right arrow, and a circle with a dot.

| Integration Result |                | Calculation Result |             | TimeTable   |            |
|--------------------|----------------|--------------------|-------------|-------------|------------|
| No.                | Retention Time | PeakArea           | Peak Height | PeakArea(%) | Peak Width |
| 1                  | 14.42          | 380746             | 11185       | 50.15%      | 1.319 BB   |
| 2                  | 18.41          | 378500             | 8274        | 49.85%      | 2.638 BB   |
| Total              |                | 759,246            | 19,459      | 100.00%     |            |

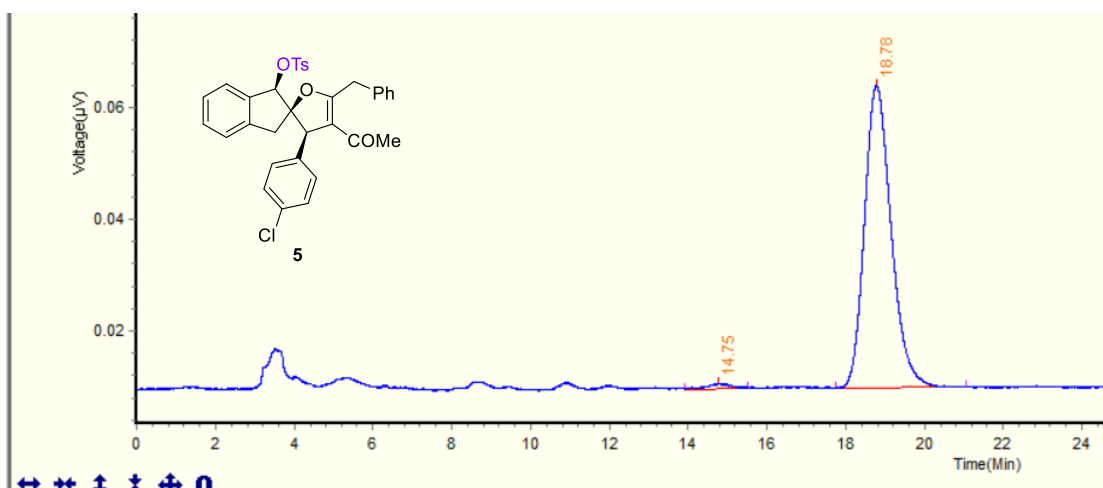

Navigation icons: left arrow, double left arrow, up arrow, double up arrow, right arrow, double right arrow, and a circle with a dot.

| Integration Result |                | Calculation Result |             | TimeTable   |            |
|--------------------|----------------|--------------------|-------------|-------------|------------|
| No.                | Retention Time | PeakArea           | Peak Height | PeakArea(%) | Peak Width |
| 1                  | 14.75          | 15380              | 393         | 1.20%       | 1.602 BB   |
| 2                  | 18.78          | 1270326            | 27059       | 98.80%      | 3.308 BB   |
| Total              |                | 1,285,706          | 27,452      | 100.00%     |            |

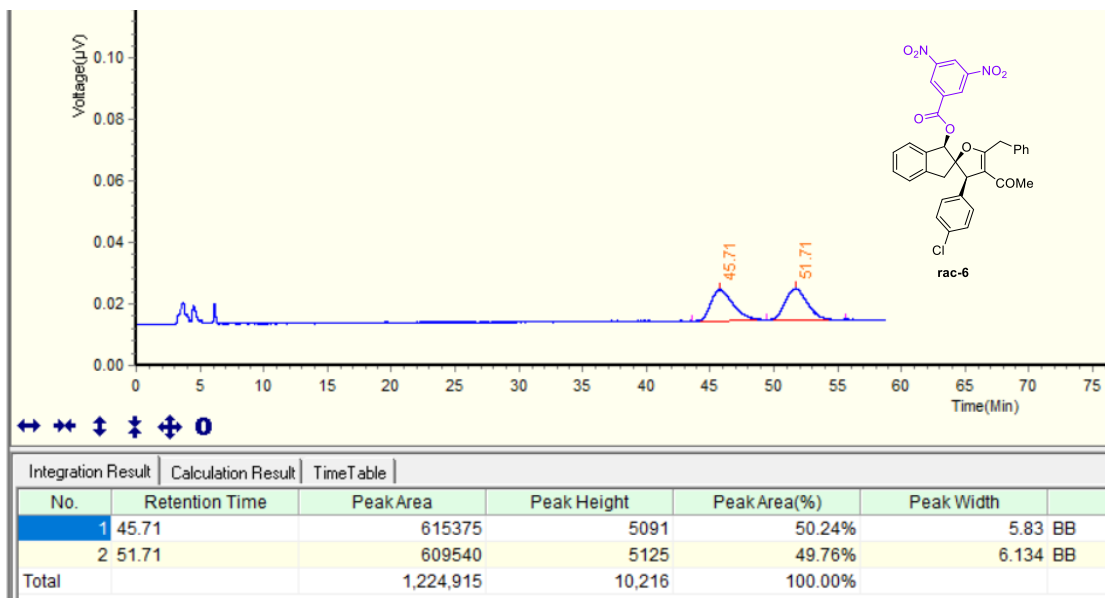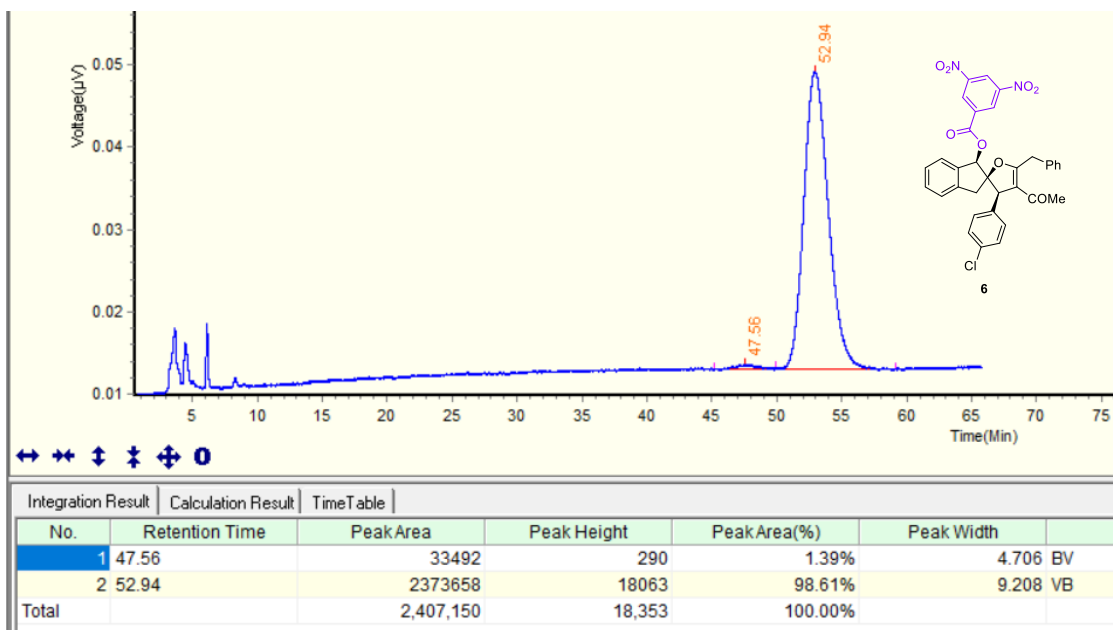

## Single-crystal X-ray diffraction of 6 (CCDC 2247366)

X-ray analysis was carried out using the single crystal which was grown in Hexane/acetone.

The instrumentation used for the crystal measurement is Oxford Gemini E X-ray single-crystal diffractometer (ellipsoid contour at 30% probability level).

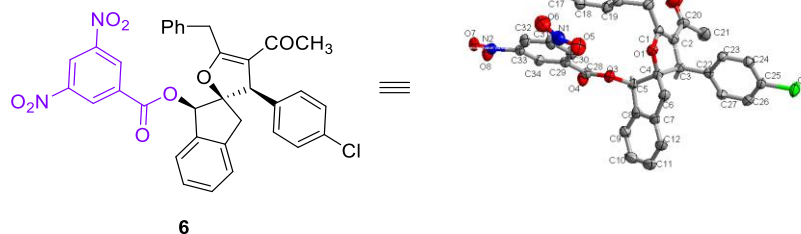

### Datablock: 20230229

|                                                               |                              |                     |               |
|---------------------------------------------------------------|------------------------------|---------------------|---------------|
| Bond precision:                                               | C-C = 0.0059 Å               | Wavelength=1.54184  |               |
| Cell:                                                         | a=15.7718 (3)                | b=14.18227 (19)     | c=16.7062 (3) |
|                                                               | alpha=90                     | beta=115.571 (2)    | gamma=90      |
| Temperature:                                                  | 293 K                        |                     |               |
|                                                               | Calculated                   | Reported            |               |
| Volume                                                        | 3370.82 (11)                 | 3370.80 (11)        |               |
| Space group                                                   | P 21                         | P 1 21 1            |               |
| Hall group                                                    | P 2yb                        | P 2yb               |               |
| Moiety formula                                                | C34 H25 Cl N2 O8 [+ solvent] | 1(C34 H25 Cl N2 O8) |               |
| Sum formula                                                   | C34 H25 Cl N2 O8 [+ solvent] | C34 H25 Cl N2 O8    |               |
| Mr                                                            | 625.01                       | 625.01              |               |
| Dx, g cm <sup>-3</sup>                                        | 1.232                        | 1.232               |               |
| Z                                                             | 4                            | 4                   |               |
| Mu (mm <sup>-1</sup> )                                        | 1.435                        | 1.435               |               |
| F000                                                          | 1296.0                       | 1296.0              |               |
| F000'                                                         | 1301.58                      |                     |               |
| h, k, lmax                                                    | 19, 17, 20                   | 19, 17, 20          |               |
| Nref                                                          | 13011[ 6787]                 | 12736               |               |
| Tmin, Tmax                                                    | 0.799, 0.866                 | 0.915, 1.000        |               |
| Tmin'                                                         | 0.795                        |                     |               |
| Correction method= # Reported T Limits: Tmin=0.915 Tmax=1.000 |                              |                     |               |
| AbsCorr = MULTI-SCAN                                          |                              |                     |               |
| Data completeness=                                            | 1.88/0.98                    | Theta (max)= 70.964 |               |

R(reflections)= 0.0477( 10785)

wR2(reflections)=  
0.1358( 12736)

S = 1.028

Npar= 807

The following ALERTS were generated. Each ALERT has the format  
**test-name\_ALERT\_alert-type\_alert-level.**  
Click on the hyperlinks for more details of the test.

● **Alert level C**

|                   |                                               |       |      |      |         |      |
|-------------------|-----------------------------------------------|-------|------|------|---------|------|
| PLAT234_ALERT_4_C | Large Hirshfeld Difference C10                | --C11 | .    | 0.16 | Ang.    |      |
| PLAT242_ALERT_2_C | Low 'MainMol' Ueq as Compared to Neighbors of |       |      | C25' | Check   |      |
| PLAT242_ALERT_2_C | Low 'MainMol' Ueq as Compared to Neighbors of |       |      | C20  | Check   |      |
| PLAT242_ALERT_2_C | Low 'MainMol' Ueq as Compared to Neighbors of |       |      | C25  | Check   |      |
| PLAT334_ALERT_2_C | Small <C-C> Benzene Dist.                     | C22   | -C27 | .    | 1.37    | Ang. |
| PLAT334_ALERT_2_C | Small <C-C> Benzene Dist.                     | C29   | -C34 | .    | 1.37    | Ang. |
| PLAT340_ALERT_3_C | Low Bond Precision on C-C Bonds .....         |       |      |      | 0.00588 | Ang. |

● **Alert level G**

|                   |                                                  |         |           |       |       |        |        |
|-------------------|--------------------------------------------------|---------|-----------|-------|-------|--------|--------|
| PLAT002_ALERT_2_G | Number of Distance or Angle Restraints on AtSite |         |           |       | 13    | Note   |        |
| PLAT003_ALERT_2_G | Number of Uiso or Uij Restrained non-H Atoms ... |         |           |       | 13    | Report |        |
| PLAT171_ALERT_4_G | The CIF-Embedded .res File Contains EADP Records |         |           |       | 13    | Report |        |
| PLAT172_ALERT_4_G | The CIF-Embedded .res File Contains DFIX Records |         |           |       | 8     | Report |        |
| PLAT186_ALERT_4_G | The CIF-Embedded .res File Contains ISOR Records |         |           |       | 3     | Report |        |
| PLAT199_ALERT_1_G | Reported _cell_measurement_temperature .... (K)  |         |           |       | 293   | Check  |        |
| PLAT200_ALERT_1_G | Reported _diffrn_ambient_temperature .... (K)    |         |           |       | 293   | Check  |        |
| PLAT301_ALERT_3_G | Main Residue Disorder .....                      | (Resd 1 | )         |       | 22%   | Note   |        |
| PLAT301_ALERT_3_G | Main Residue Disorder .....                      | (Resd 2 | )         |       | 7%    | Note   |        |
| PLAT398_ALERT_2_G | Deviating C-O-C Angle From 120 for O1'           |         |           |       | 106.6 | Degree |        |
| PLAT398_ALERT_2_G | Deviating C-O-C Angle From 120 for O1            |         |           |       | 107.1 | Degree |        |
| PLAT431_ALERT_2_G | Short Inter HL..A Contact C11'                   |         | ..07'     |       | 3.14  | Ang.   |        |
|                   |                                                  |         | x,y,1+z = |       | 1_556 | Check  |        |
| PLAT606_ALERT_4_G | Solvent Accessible VOID(S) in Structure .....    |         |           |       |       | ! Info |        |
| PLAT720_ALERT_4_G | Number of Unusual/Non-Standard Labels .....      |         |           |       | 7     | Note   |        |
| PLAT721_ALERT_1_G | Bond Calc 0.96000, Rep 0.97000 Dev...            |         |           |       | 0.01  | Ang.   |        |
|                   | C1A -H1AA                                        | 1_555   | 1_555     | ..... | #     | 80     | Check  |
| PLAT791_ALERT_4_G | Model has Chirality at C3                        | (Sohnke | SpGr)     |       |       | R      | Verify |
| PLAT791_ALERT_4_G | Model has Chirality at C3'                       | (Sohnke | SpGr)     |       |       | S      | Verify |
| PLAT791_ALERT_4_G | Model has Chirality at C4                        | (Sohnke | SpGr)     |       |       | R      | Verify |
| PLAT791_ALERT_4_G | Model has Chirality at C4'                       | (Sohnke | SpGr)     |       |       | R      | Verify |
| PLAT791_ALERT_4_G | Model has Chirality at C5                        | (Sohnke | SpGr)     |       |       | R      | Verify |
| PLAT791_ALERT_4_G | Model has Chirality at C5'                       | (Sohnke | SpGr)     |       |       | R      | Verify |
| PLAT860_ALERT_3_G | Number of Least-Squares Restraints .....         |         |           |       | 87    | Note   |        |
| PLAT910_ALERT_3_G | Missing # of FCF Reflection(s) Below Theta(Min). |         |           |       | 3     | Note   |        |
| PLAT912_ALERT_4_G | Missing # of FCF Reflections Above STh/L= 0.600  |         |           |       | 51    | Note   |        |
| PLAT941_ALERT_3_G | Average HKL Measurement Multiplicity .....       |         |           |       | 4.0   | Low    |        |
| PLAT978_ALERT_2_G | Number C-C Bonds with Positive Residual Density. |         |           |       | 0     | Info   |        |

0 **ALERT level A** - Most likely a serious problem - resolve or explain

0 **ALERT level B** - A potentially serious problem, consider carefully

7 **ALERT level C** - Check. Ensure it is not caused by an omission or oversight

26 **ALERT level G** - General information/check it is not something unexpected

3 ALERT type 1 CIF construction/syntax error, inconsistent or missing data  
11 ALERT type 2 Indicator that the structure model may be wrong or deficient  
6 ALERT type 3 Indicator that the structure quality may be low  
13 ALERT type 4 Improvement, methodology, query or suggestion  
0 ALERT type 5 Informative message, check

---

It is advisable to attempt to resolve as many as possible of the alerts in all categories. Often the minor alerts point to easily fixed oversights, errors and omissions in your CIF or refinement strategy, so attention to these fine details can be worthwhile. In order to resolve some of the more serious problems it may be necessary to carry out additional measurements or structure refinements. However, the purpose of your study may justify the reported deviations and the more serious of these should normally be commented upon in the discussion or experimental section of a paper or in the "special\_details" fields of the CIF. checkCIF was carefully designed to identify outliers and unusual parameters, but every test has its limitations and alerts that are not important in a particular case may appear. Conversely, the absence of alerts does not guarantee there are no aspects of the results needing attention. It is up to the individual to critically assess their own results and, if necessary, seek expert advice.

#### **Publication of your CIF in IUCr journals**

A basic structural check has been run on your CIF. These basic checks will be run on all CIFs submitted for publication in IUCr journals (*Acta Crystallographica*, *Journal of Applied Crystallography*, *Journal of Synchrotron Radiation*); however, if you intend to submit to *Acta Crystallographica Section C* or *E* or *IUCrData*, you should make sure that full publication checks are run on the final version of your CIF prior to submission.

#### **Publication of your CIF in other journals**

Please refer to the *Notes for Authors* of the relevant journal for any special instructions relating to CIF submission.

---

**PLATON version of 28/11/2022; check.def file version of 28/11/2022**
